# Supplementary material for: Genome-wide meta-analysis identifies multiple novel associations and ethnic heterogeneity of psoriasis susceptibility
Source: PubMed Central journal article supplement (PMC4423213; doi:10.1038/ncomms7916), 2015-04-23
Supplement: ncomms7916-s1.pdf [file ncomms7916-s1.pdf]

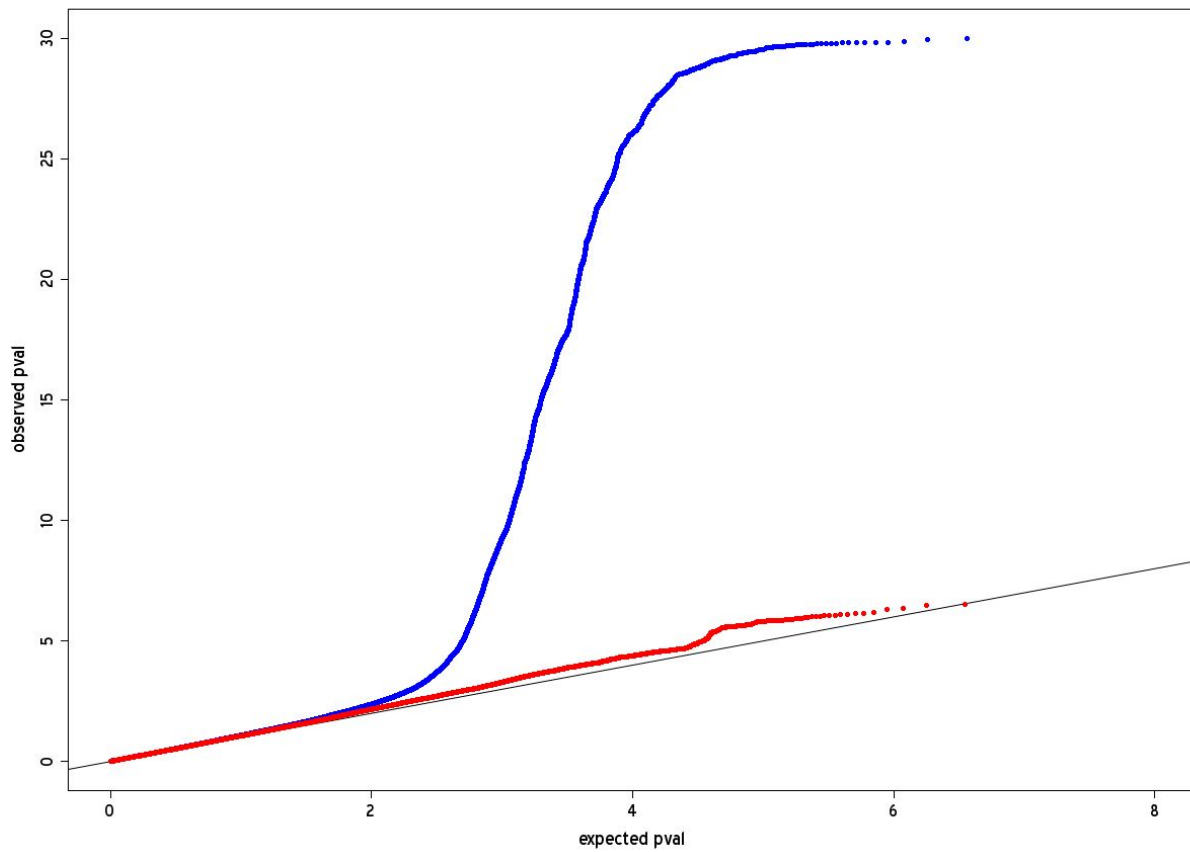

**a. trans-ethnic GWAS meta-analysis**

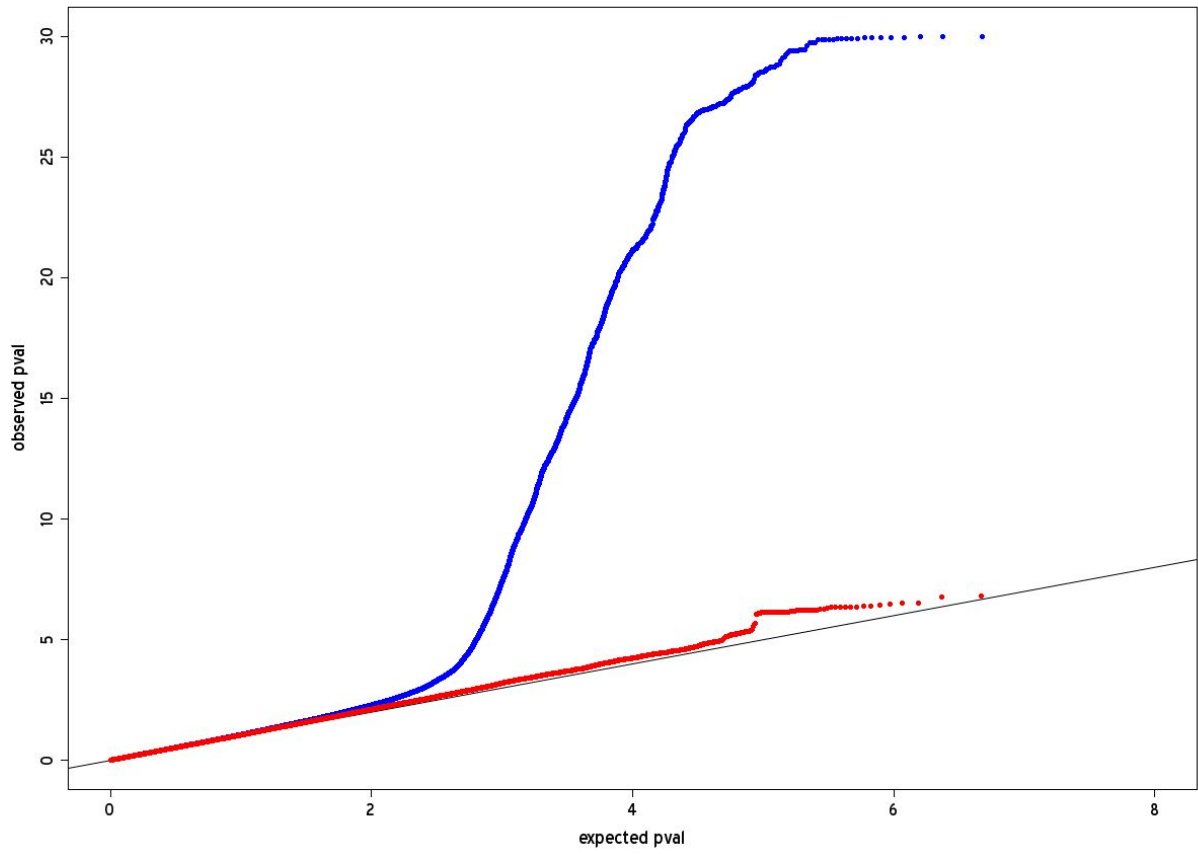

**b. Caucasian GWAS meta-analysis**

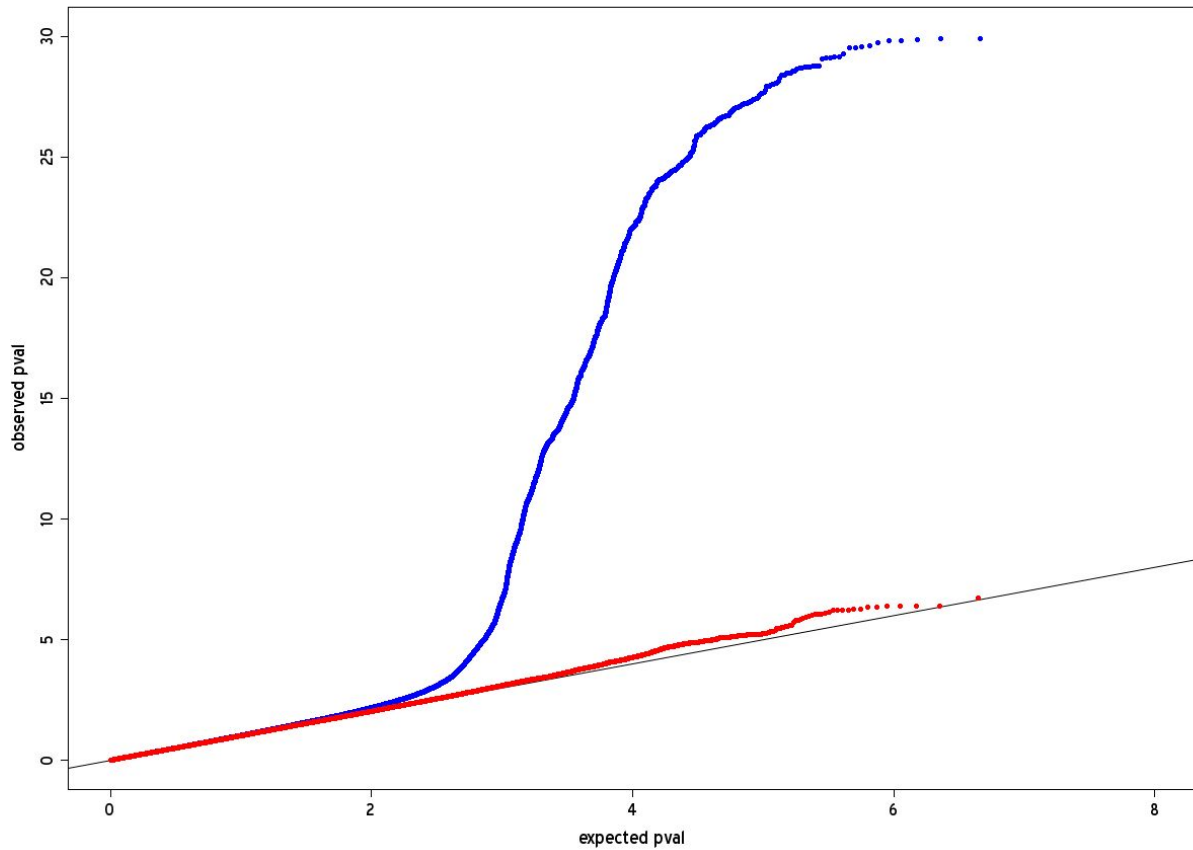

### c. Chinese GWAS meta-analysis

**Supplementary Figure 1: Quantile-quantile plot of single SNP test.** Quantile-quantile plots of P values in the (a) trans-ethnic GWAS meta-analysis; (b) Caucasian GWAS meta-analysis; (c) Chinese GWAS meta-analysis. Blue dots indicate whole genome wide statistic; red dots indicate SNPs outside the 41 known psoriasis risk loci; gray line represents expected under null hypothesis.

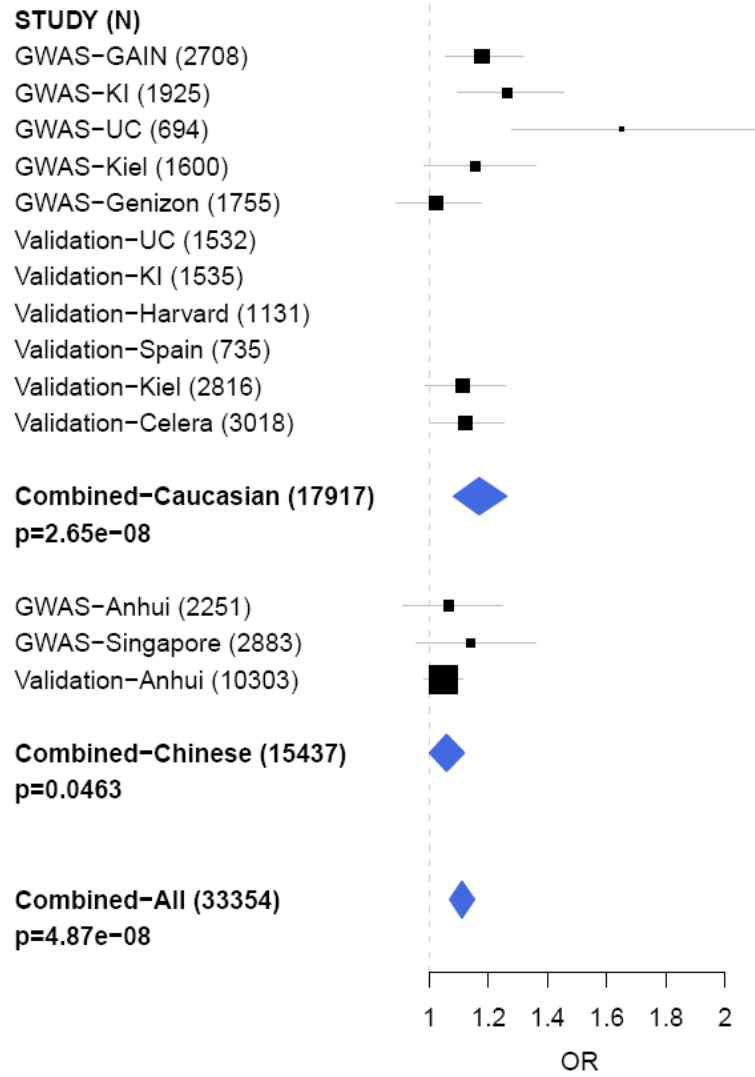

a. COG6

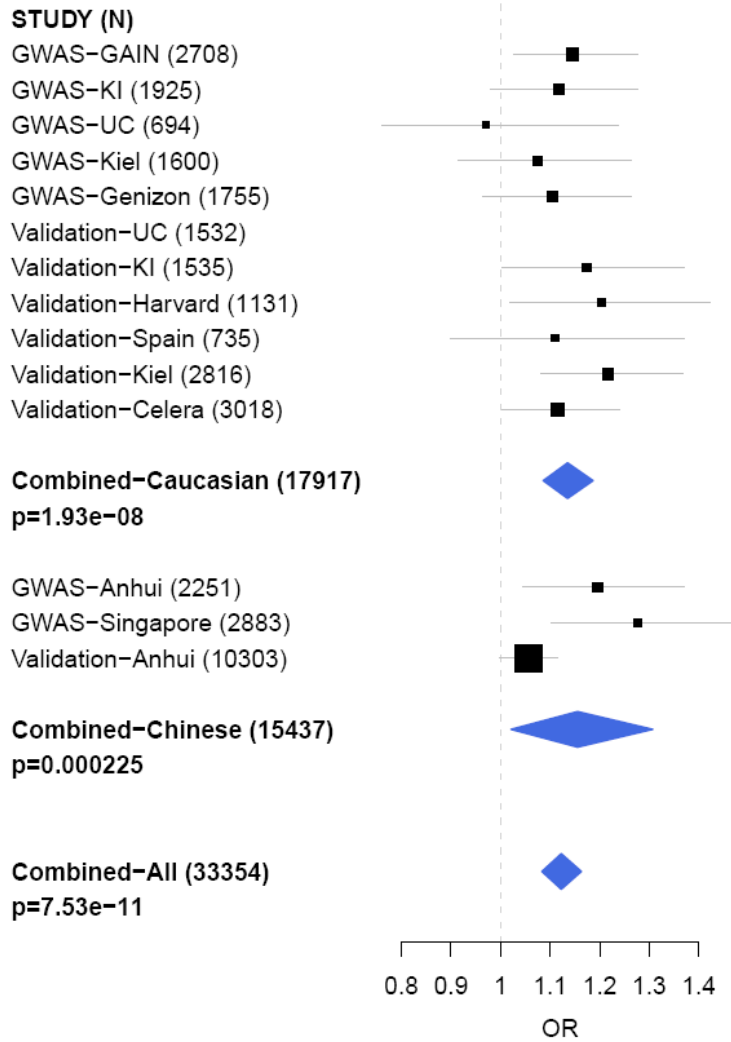

**b. LOC144817**

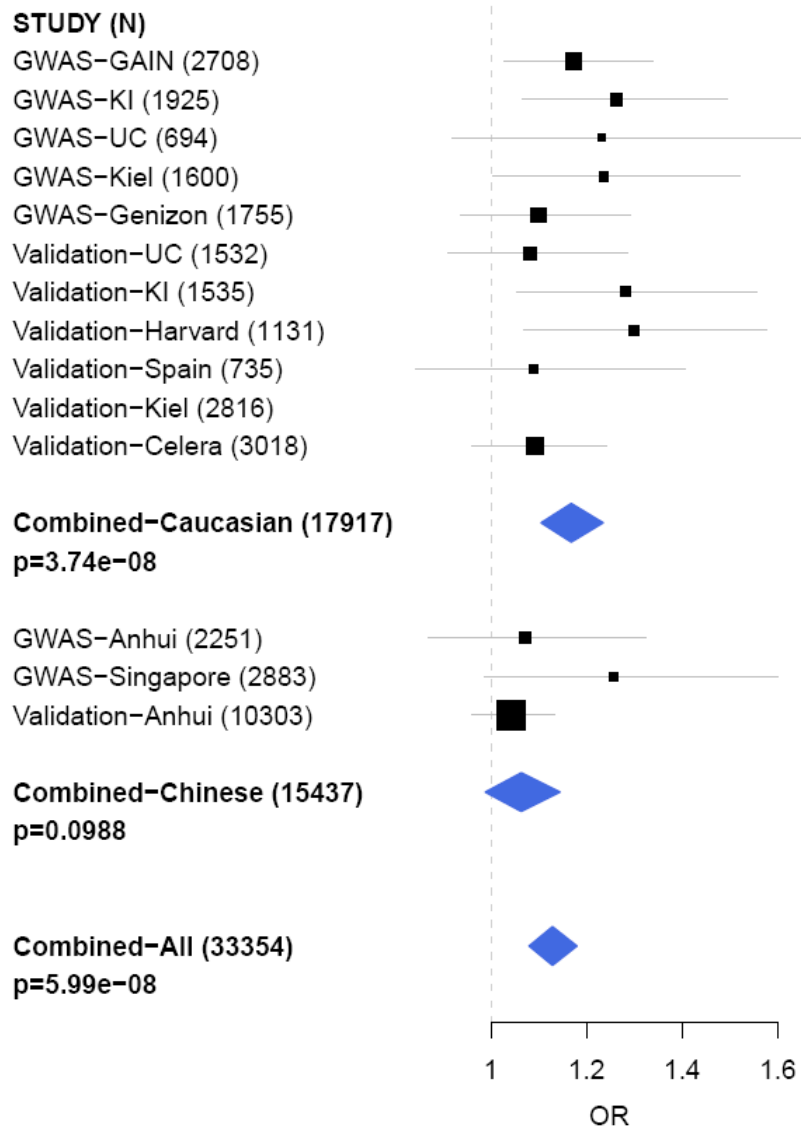

**c. RUNX1**

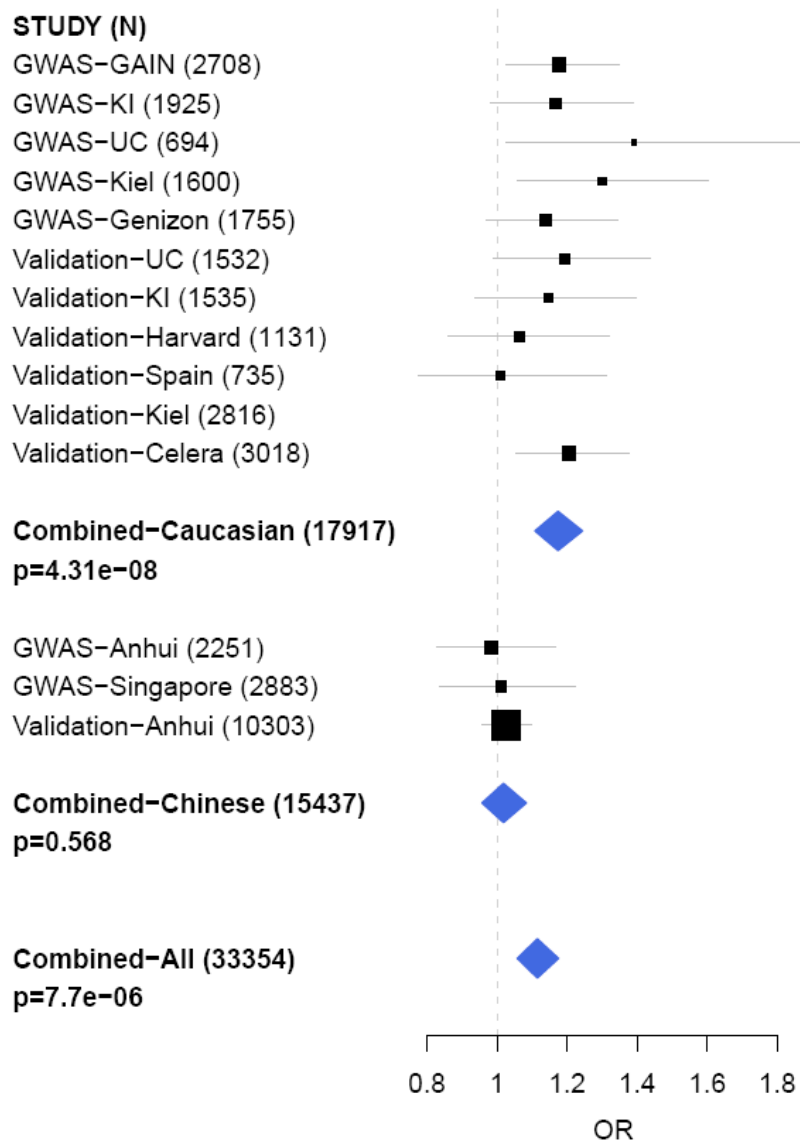

**d. TP63**

**Supplementary Figure 2: The forest plot of four novel psoriasis risk SNPs.** (a) rs34394770 in COG6 gene; (b) rs9533962 in LOC144817 gene; (c) rs8128234 in RUNX1 gene; (d) rs28512356 in TP63 gene. In the left, it indicates each study. The Plots show the study-specific association estimates (odds ratios) and 95% confidence intervals for the discovery and second-stage studies presented as bars. The association estimate and confidence interval for the meta-analysis combining the discovery and second-stage results are shown as a blue diamond. Blank spaces indicate occasions in which a particular study was not able to provide results for a given SNP.

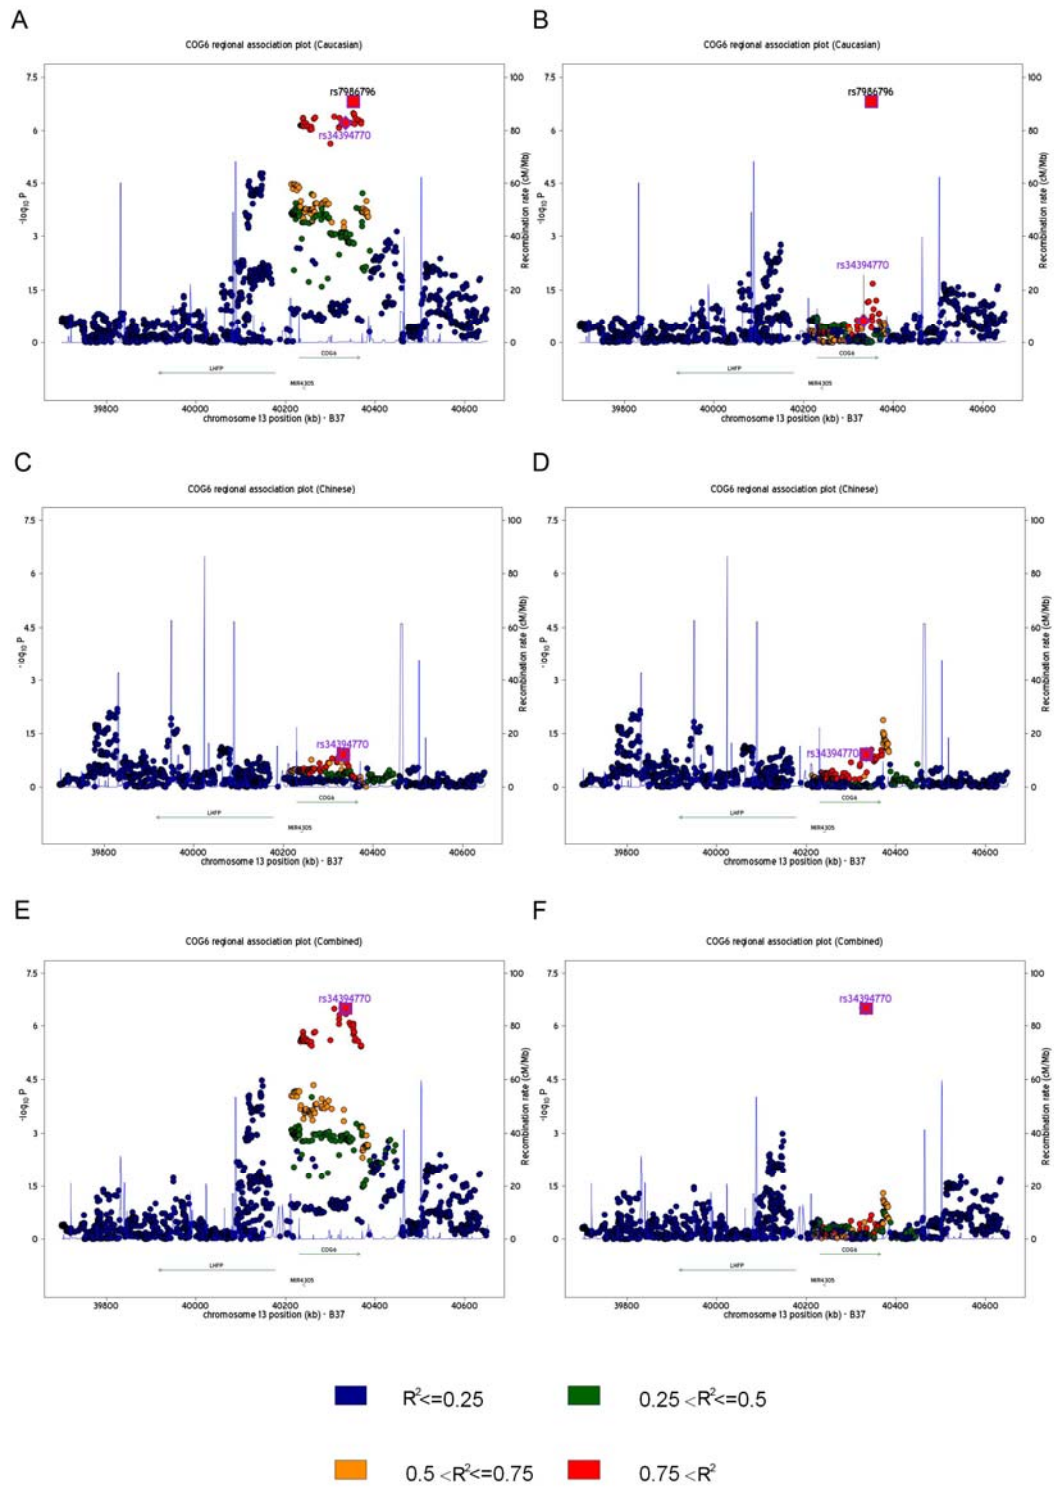

**a. COG6**



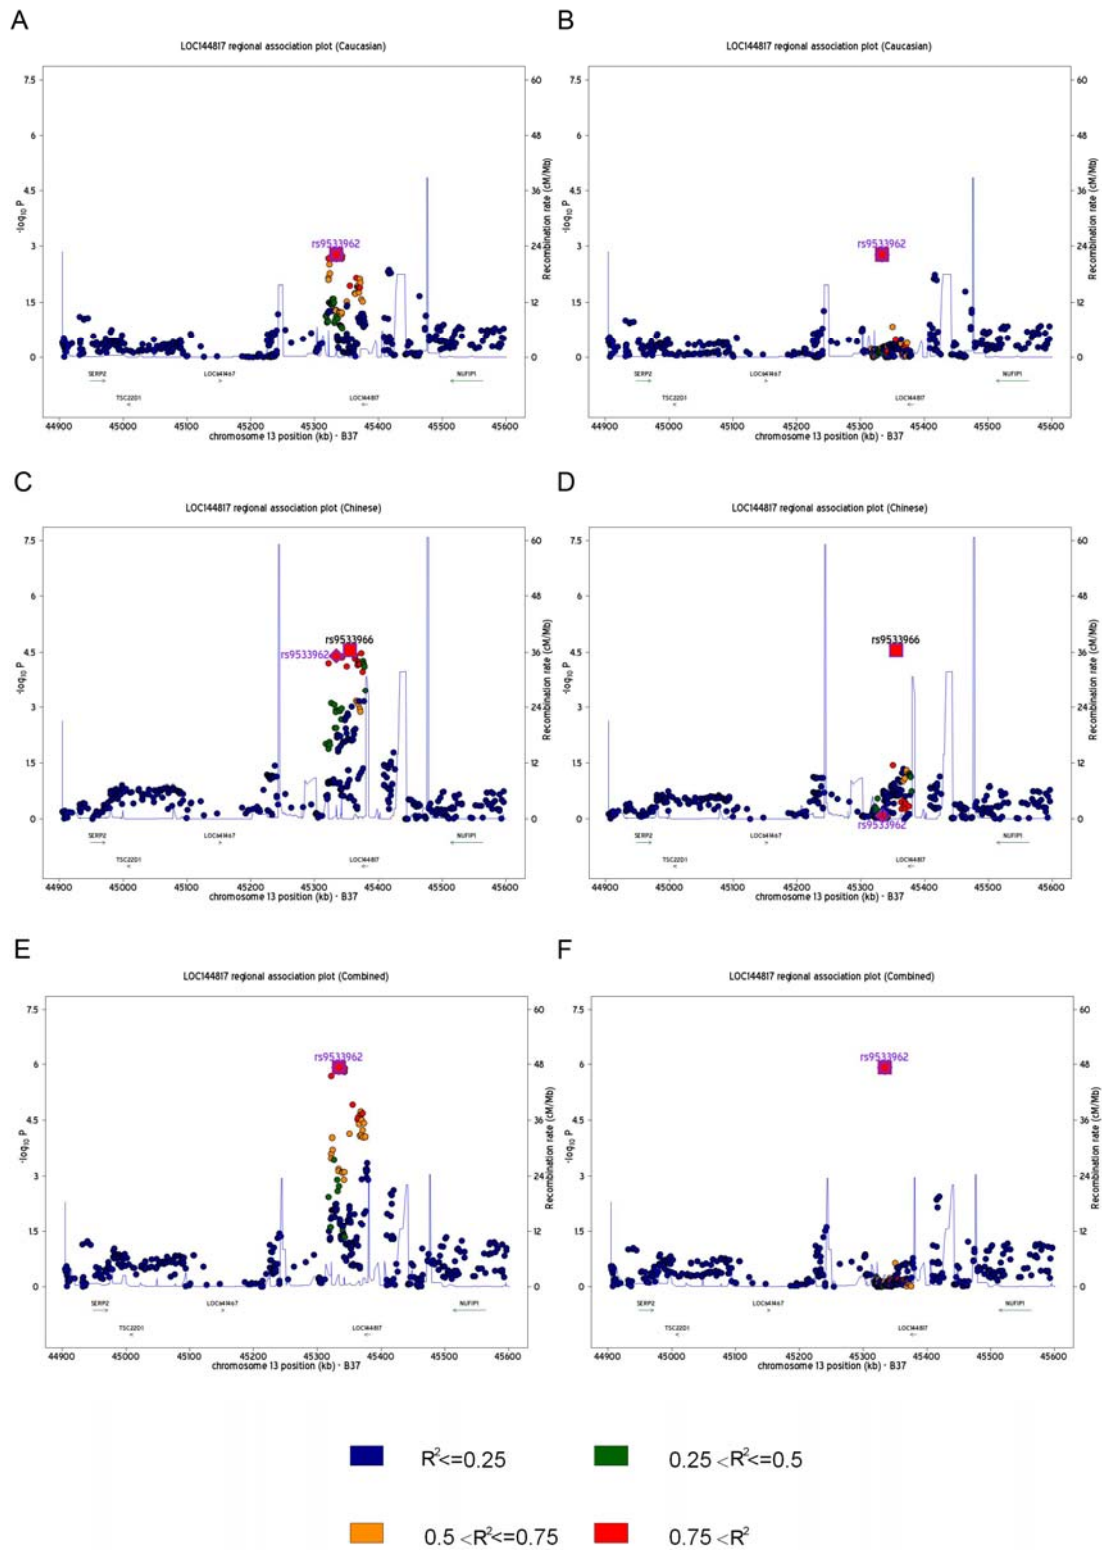

**b. LOC144817**

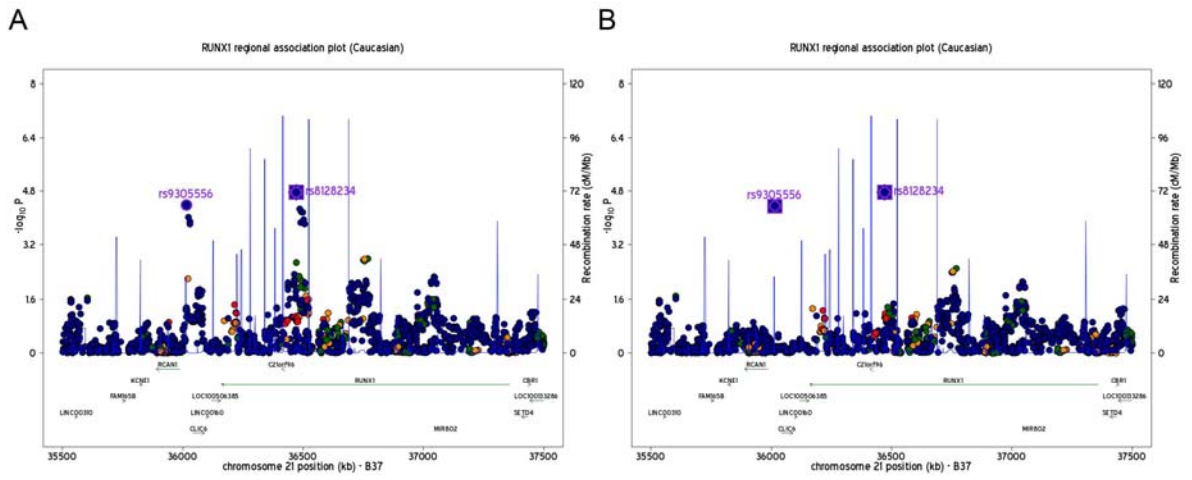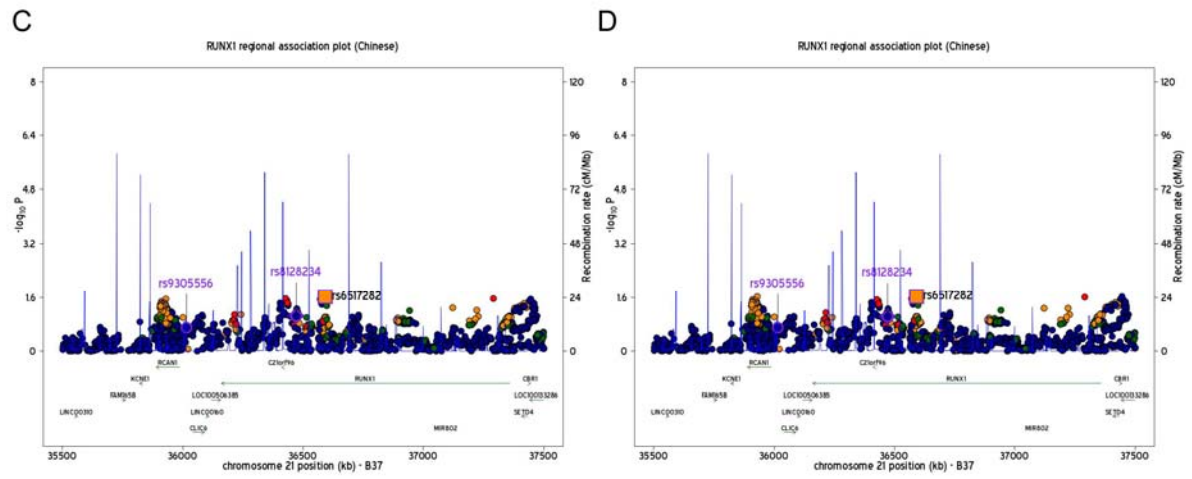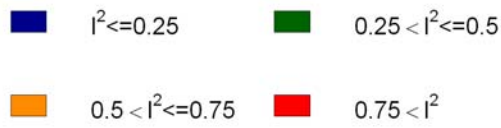

**c. RUNX1**

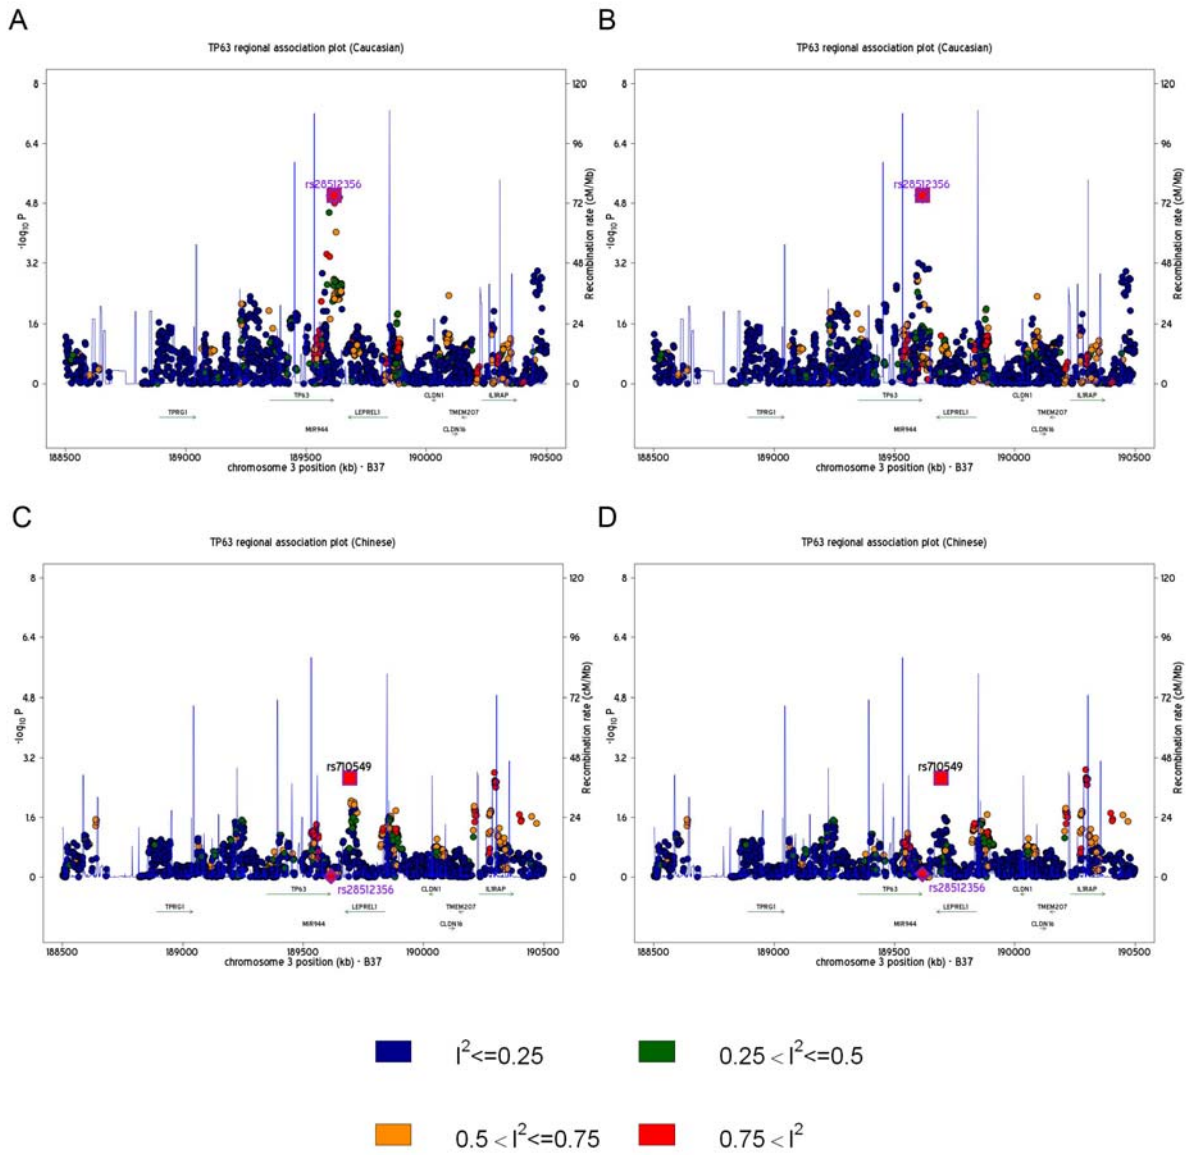

**d. TP63**

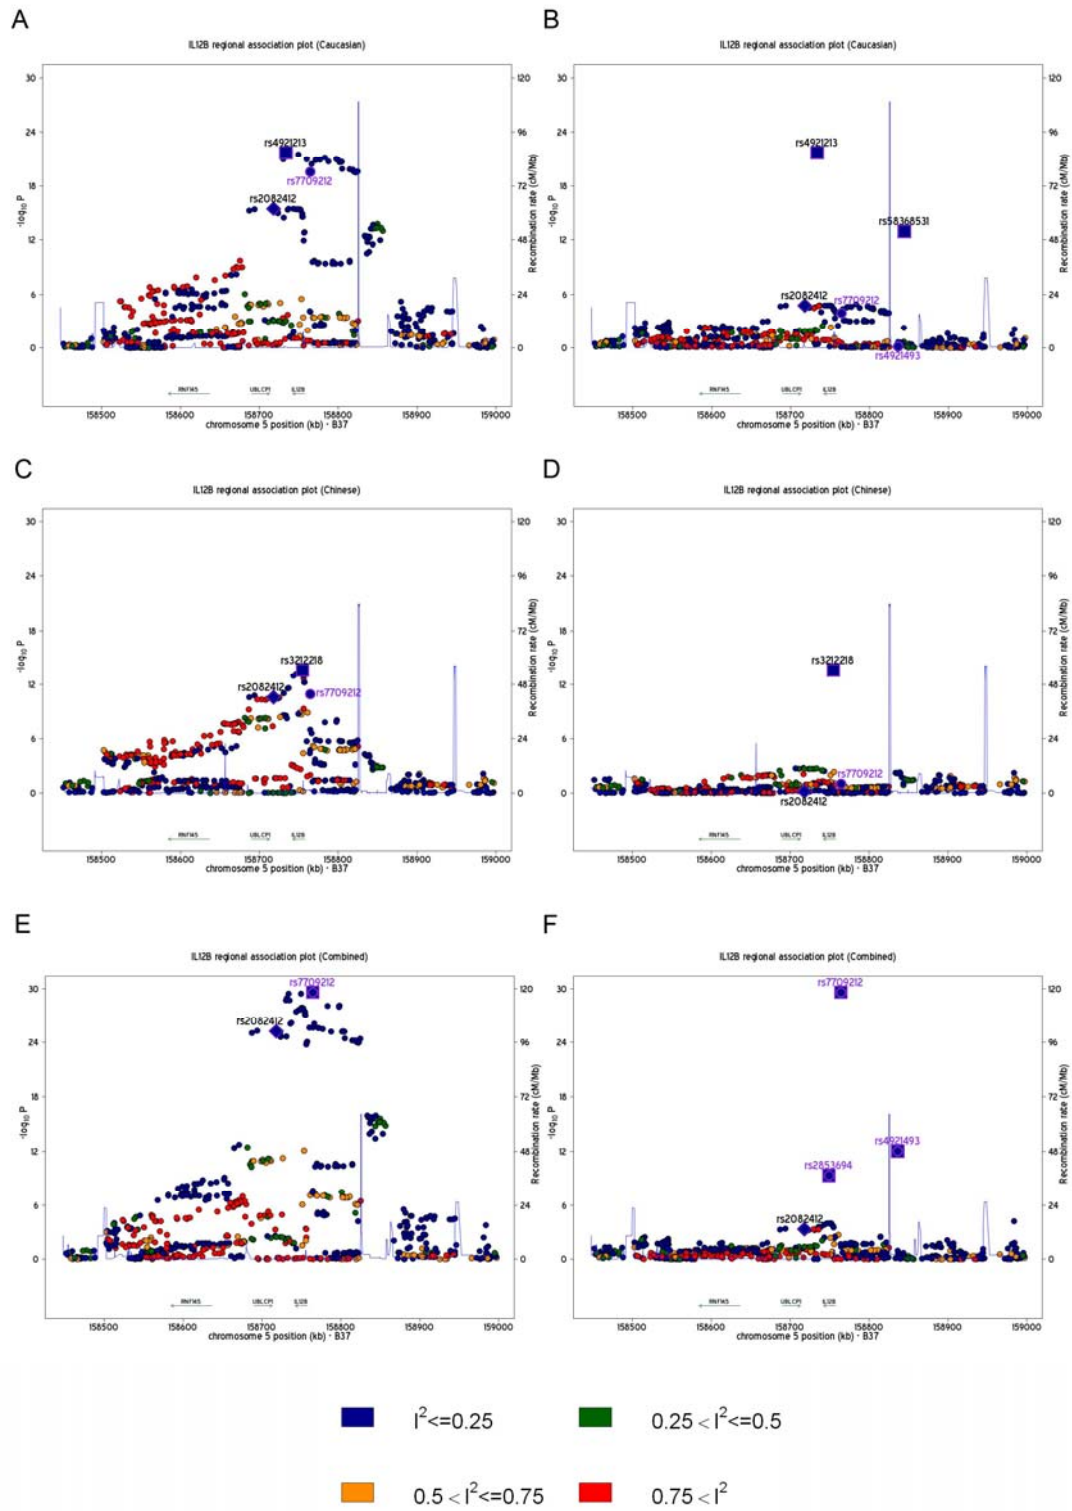

**e. IL12B**

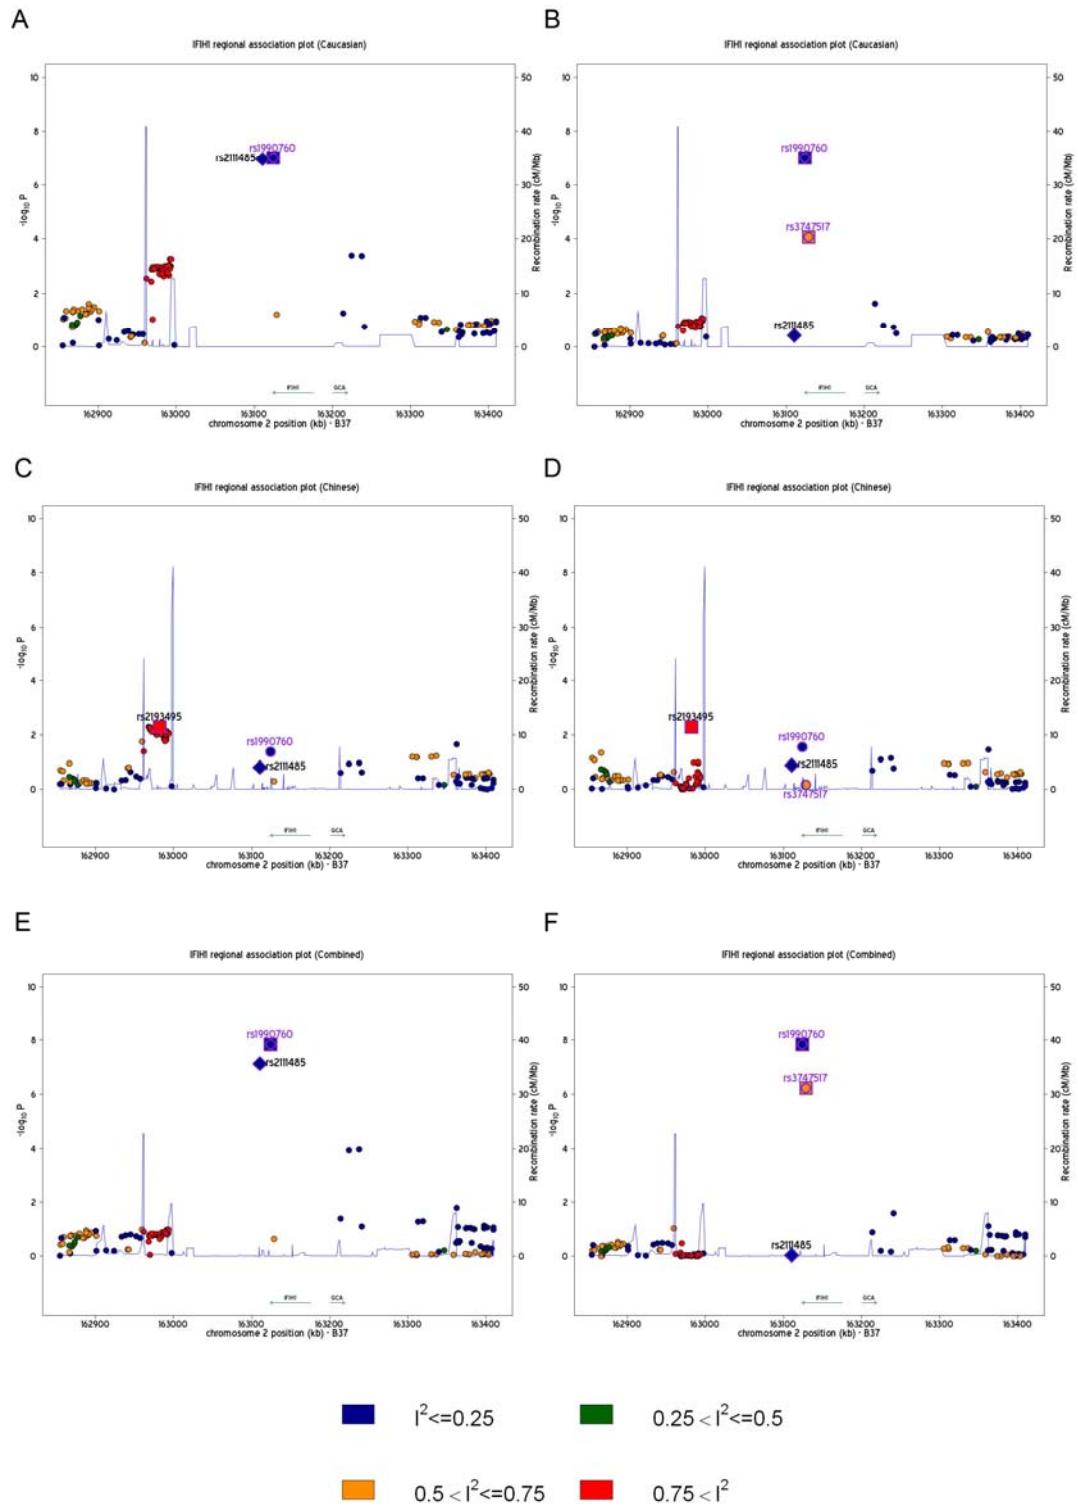

**f. IFIH1**

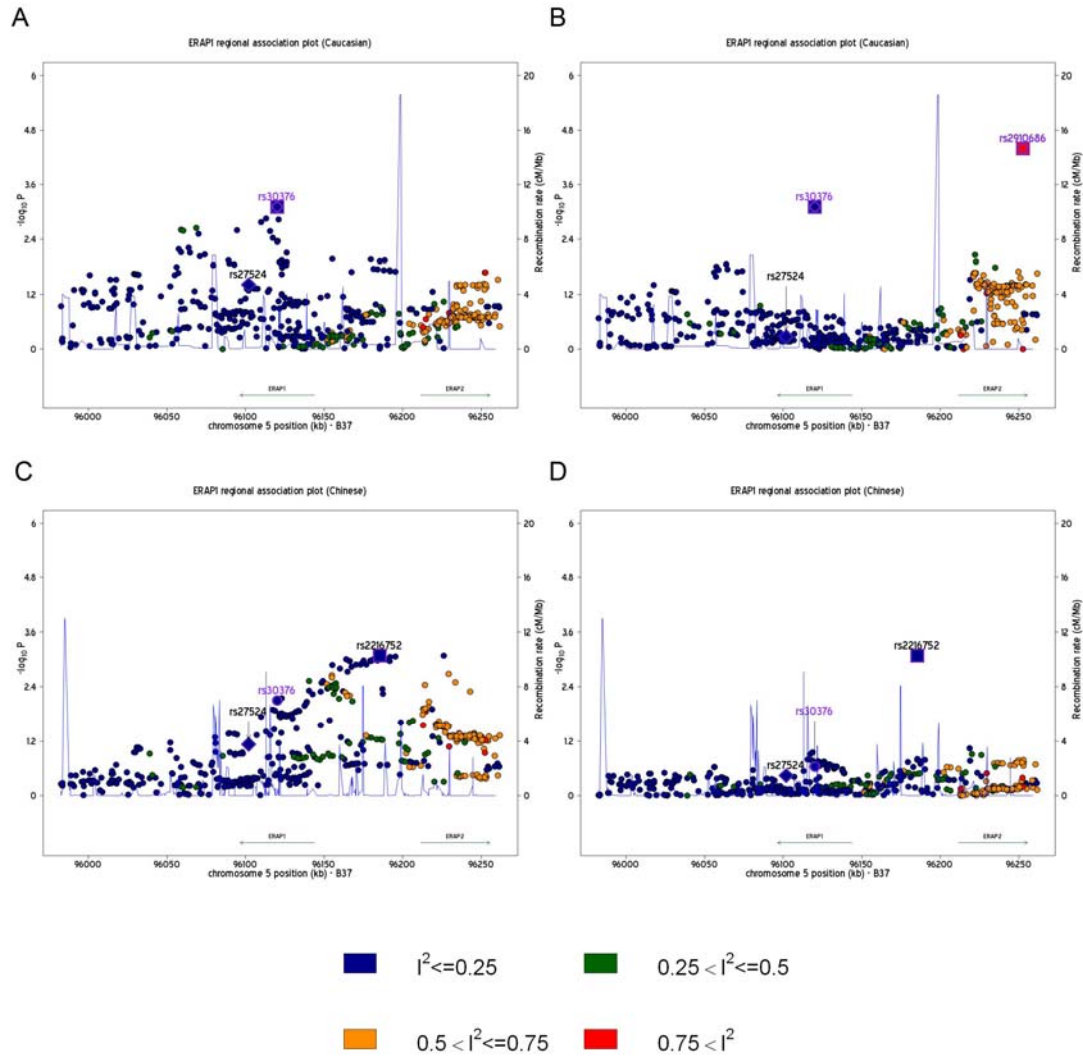

### g. ERAP1/ERAP2 locus

**Supplementary Figure 3: Regional association plot of four novel psoriasis risk loci and four independent secondary signals.** The relative location of annotated genes and the direction of transcription are shown in the lower portion of the figure, and the chromosomal position is shown on the  $x$  axis. The blue line shows the recombination rate (estimated from HapMap data of CEU, CHB and Combined population) across the region (right  $y$  axis), and the left  $y$  axis shows the significance of the associations. The  $\log_{10} P$  values from the log-additive genetic model for all SNPs in the region from the population meta analysis, trans-ethnic meta analysis or the conditional analysis. The square indicates the condition SNPs (these are the top or secondary SNPs); the circle labeled with rs IDs are reported psoriasis susceptibility SNPs, All circles and squares are color filled based on the heterogeneity results (such as  $I^2$ ) in the trans-ethnic meta analysis. A, C and E are unconditional association results of Caucasian, Chinese and combined GWAS meta-analysis respectively. B, D, F are conditional association results of Caucasian, Chinese and combined GWAS meta-analysis respectively.

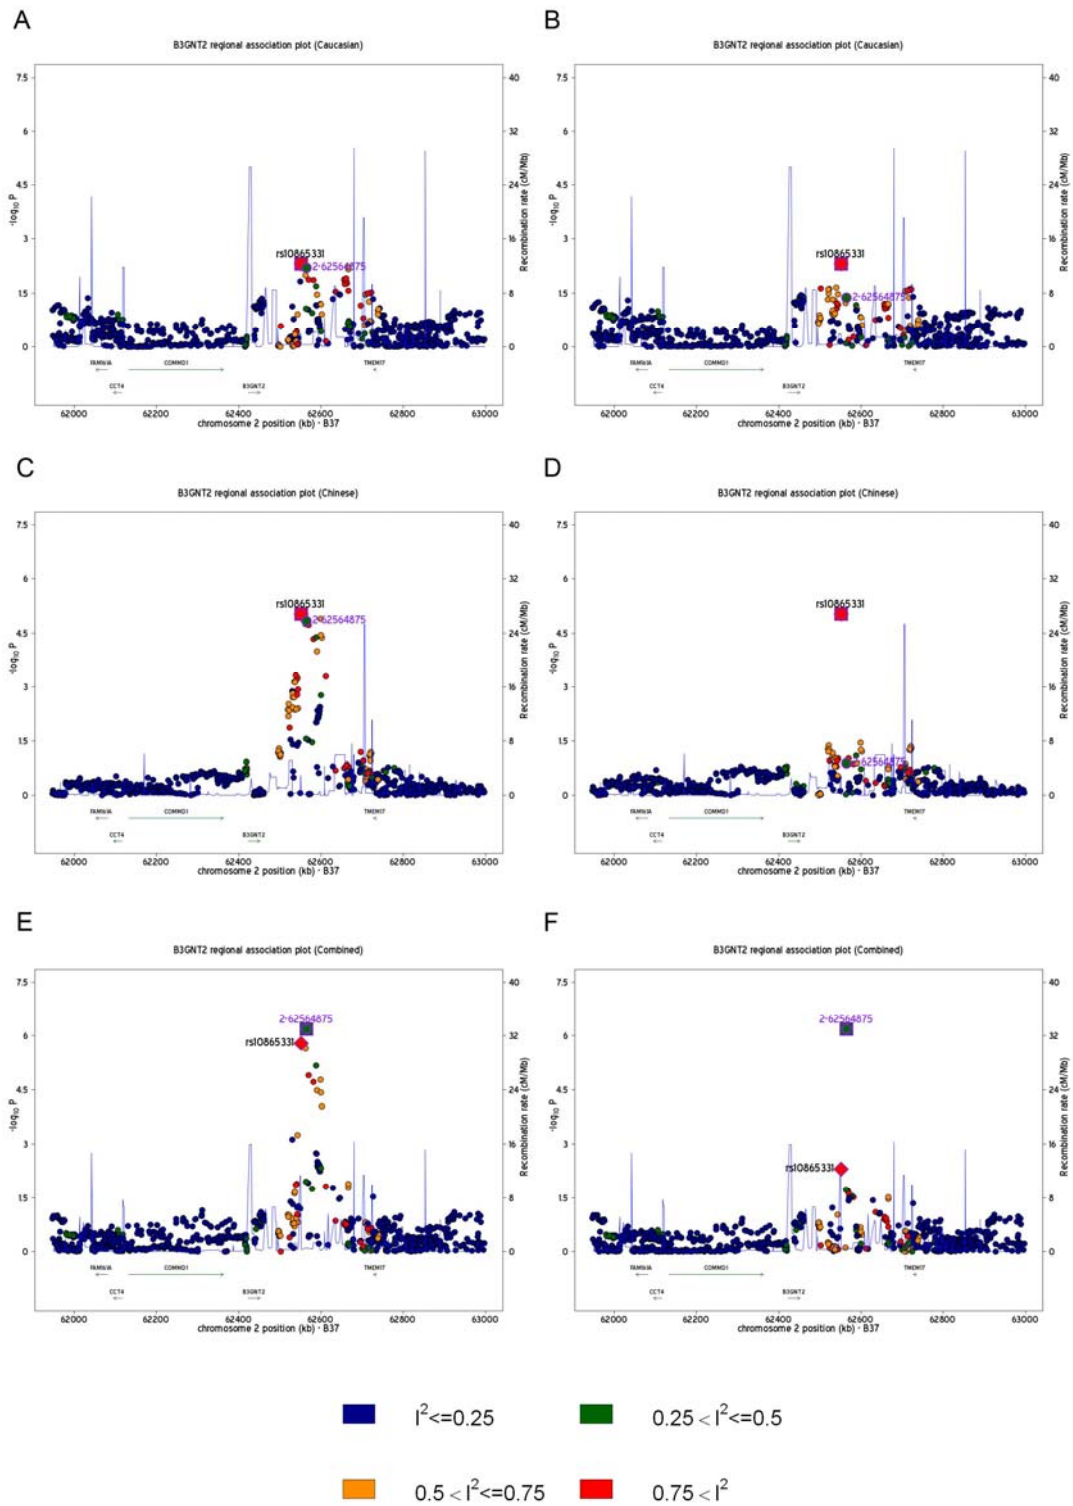

**a. B3GNT2**

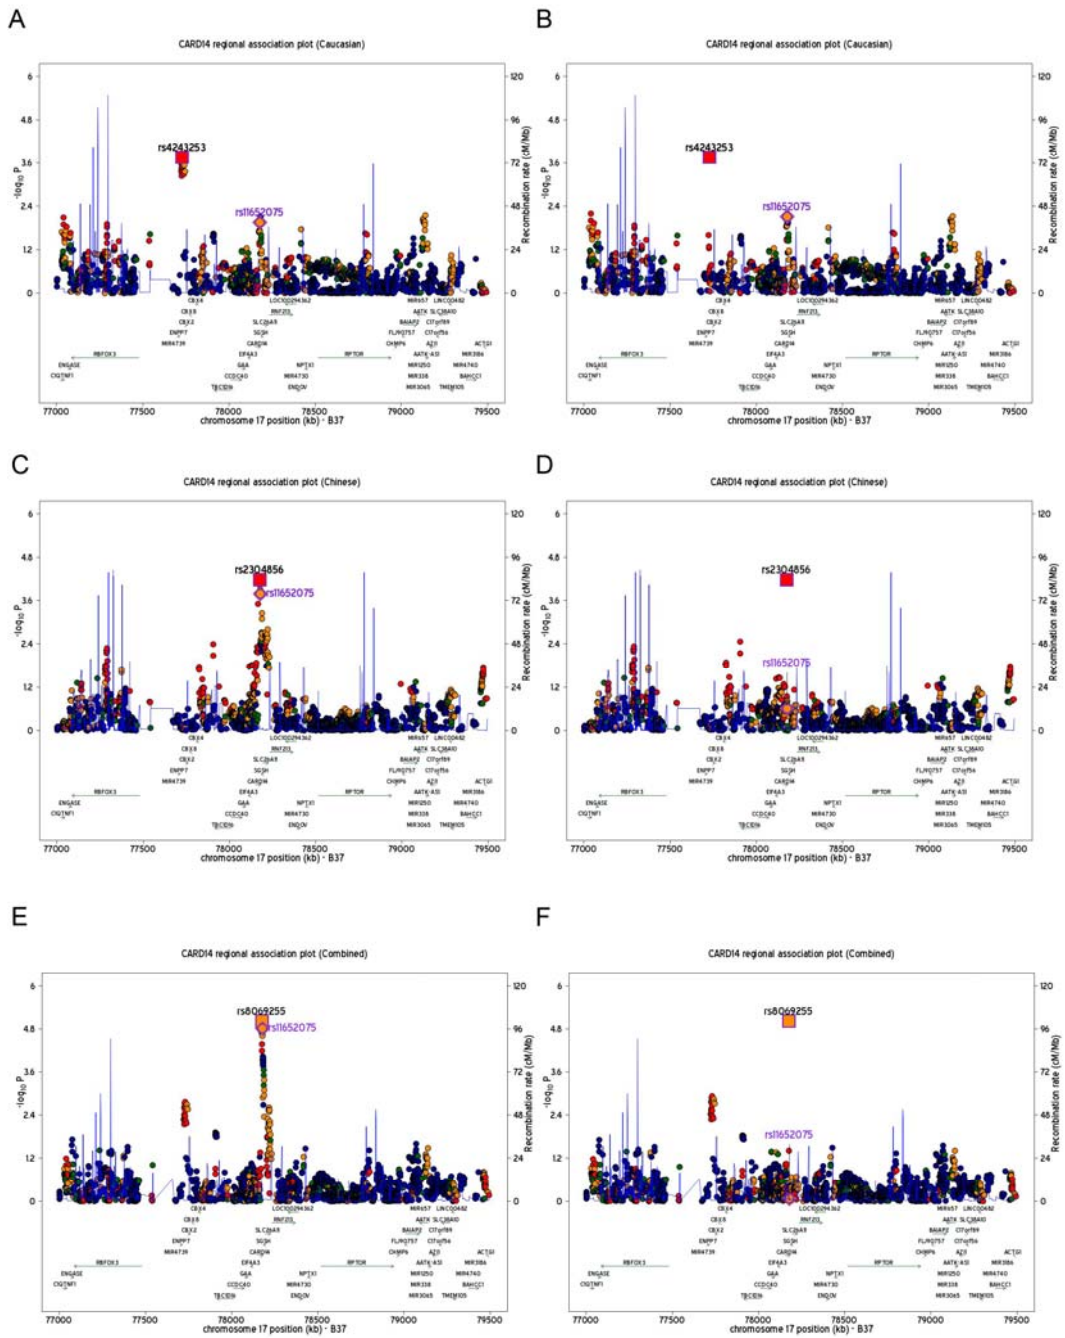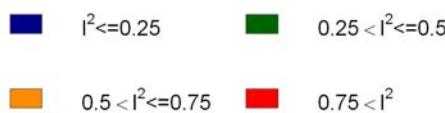

**b. CARD14**



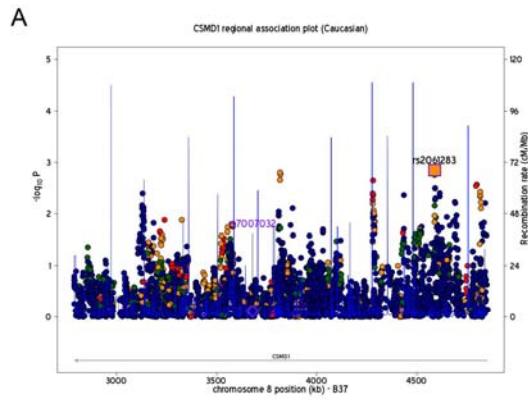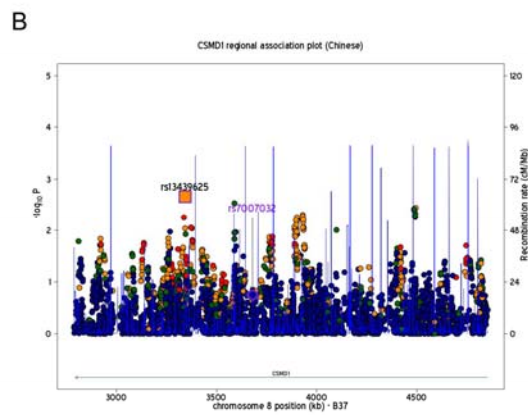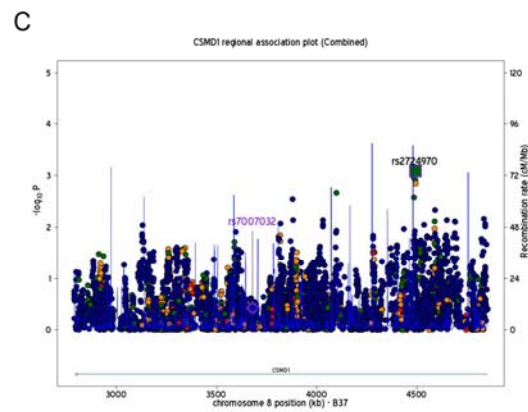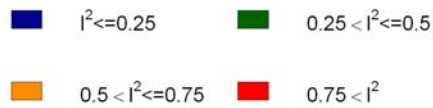

**c. CSMD1**

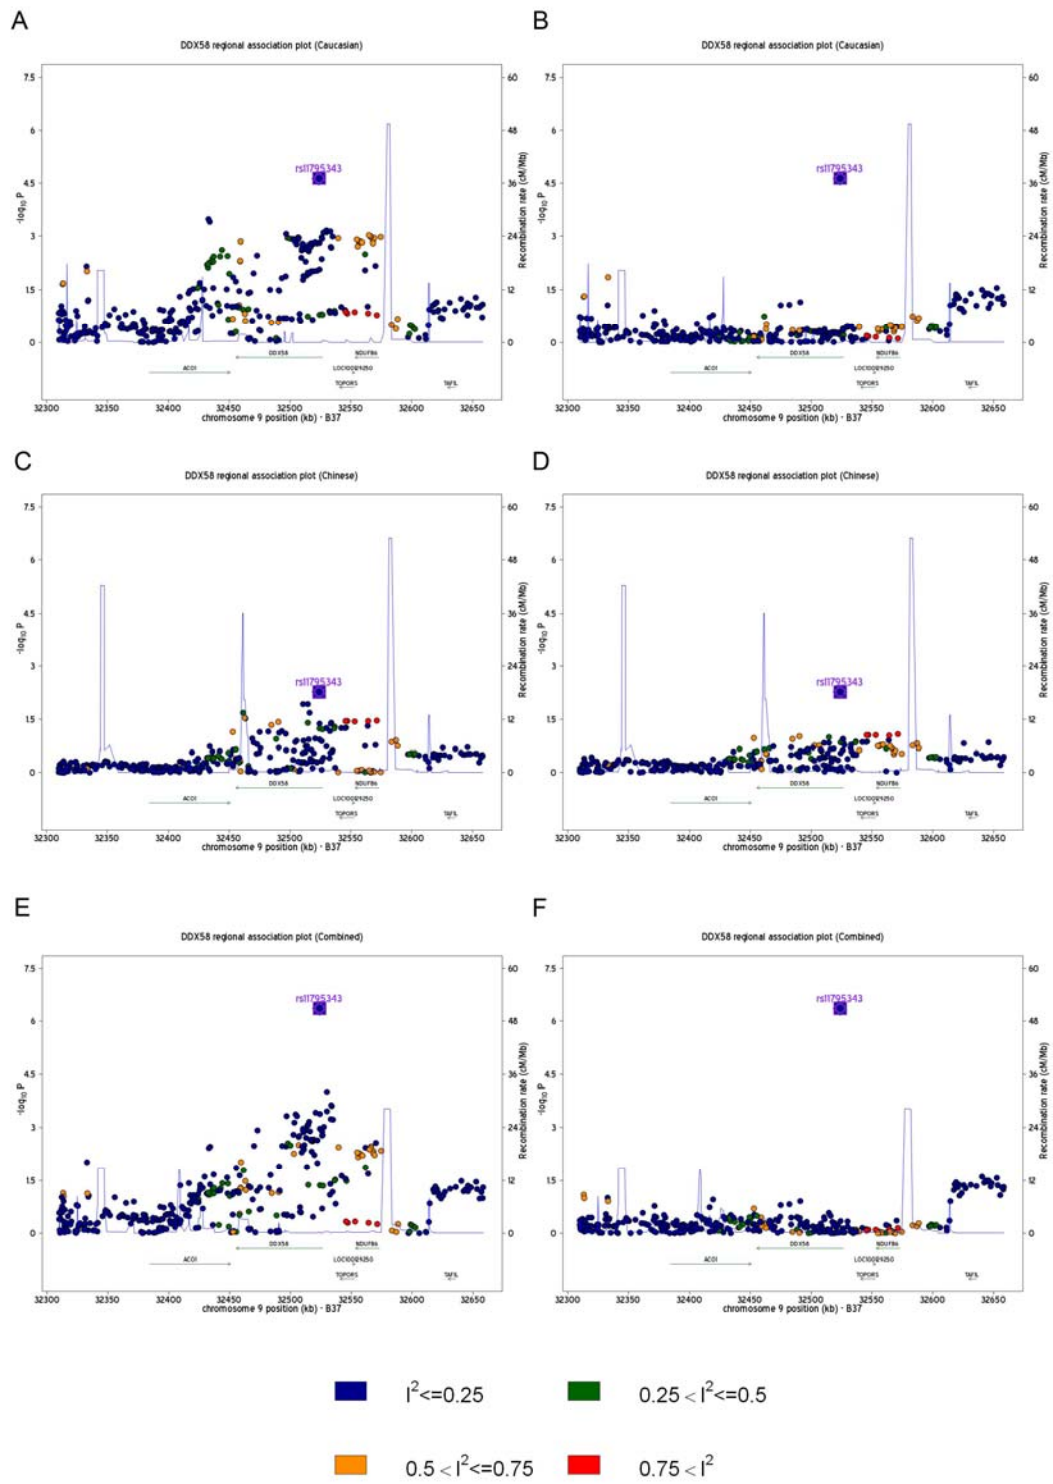

**d. DDX58**

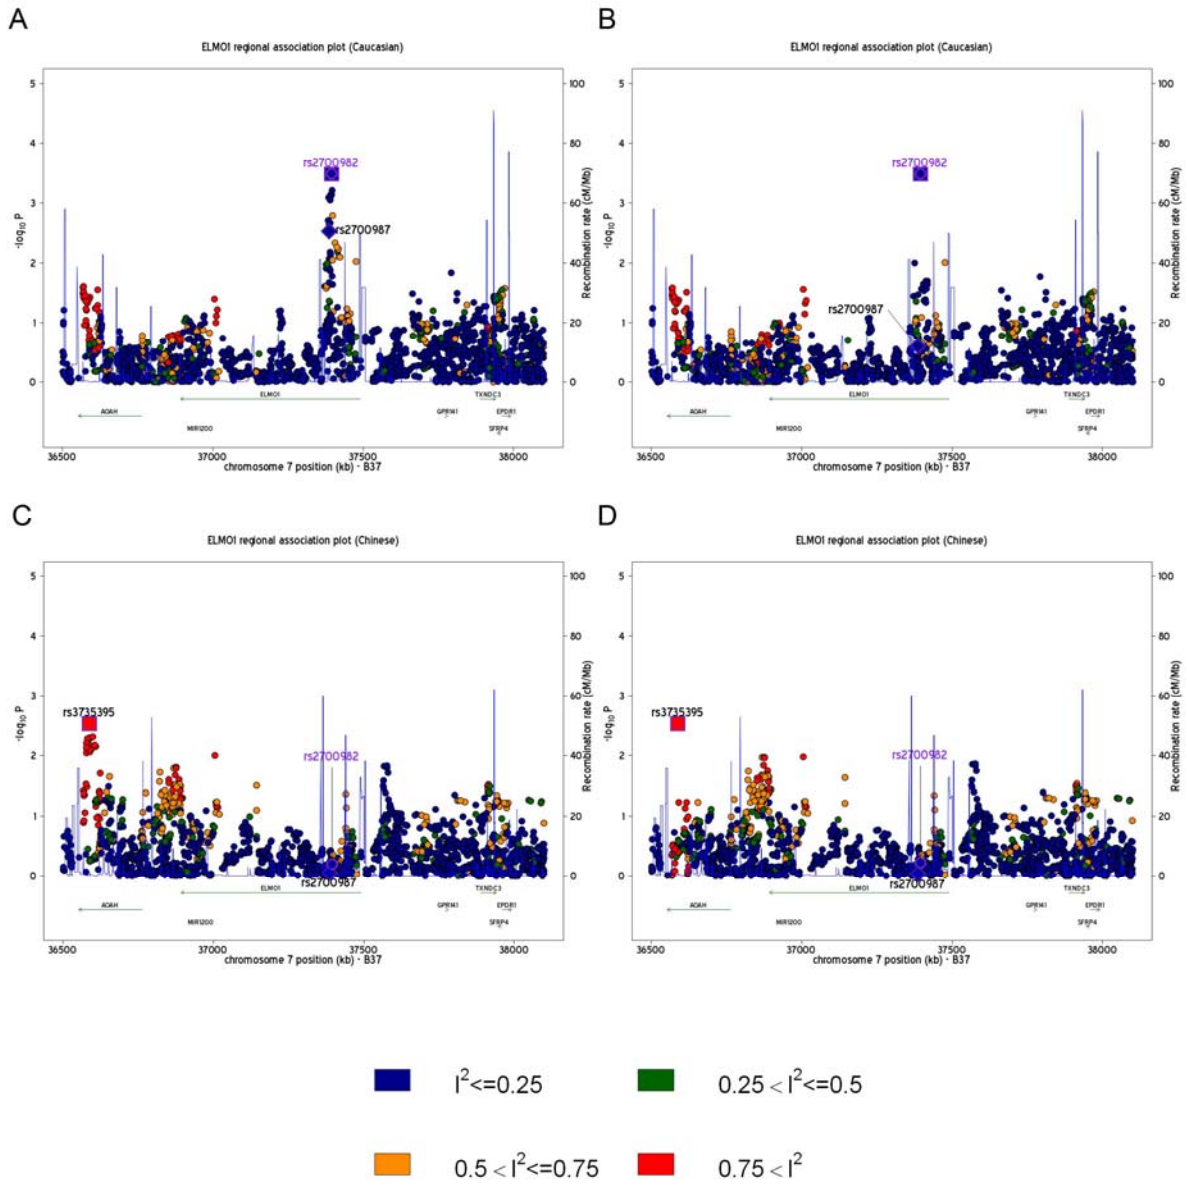

**e. ELMO1**

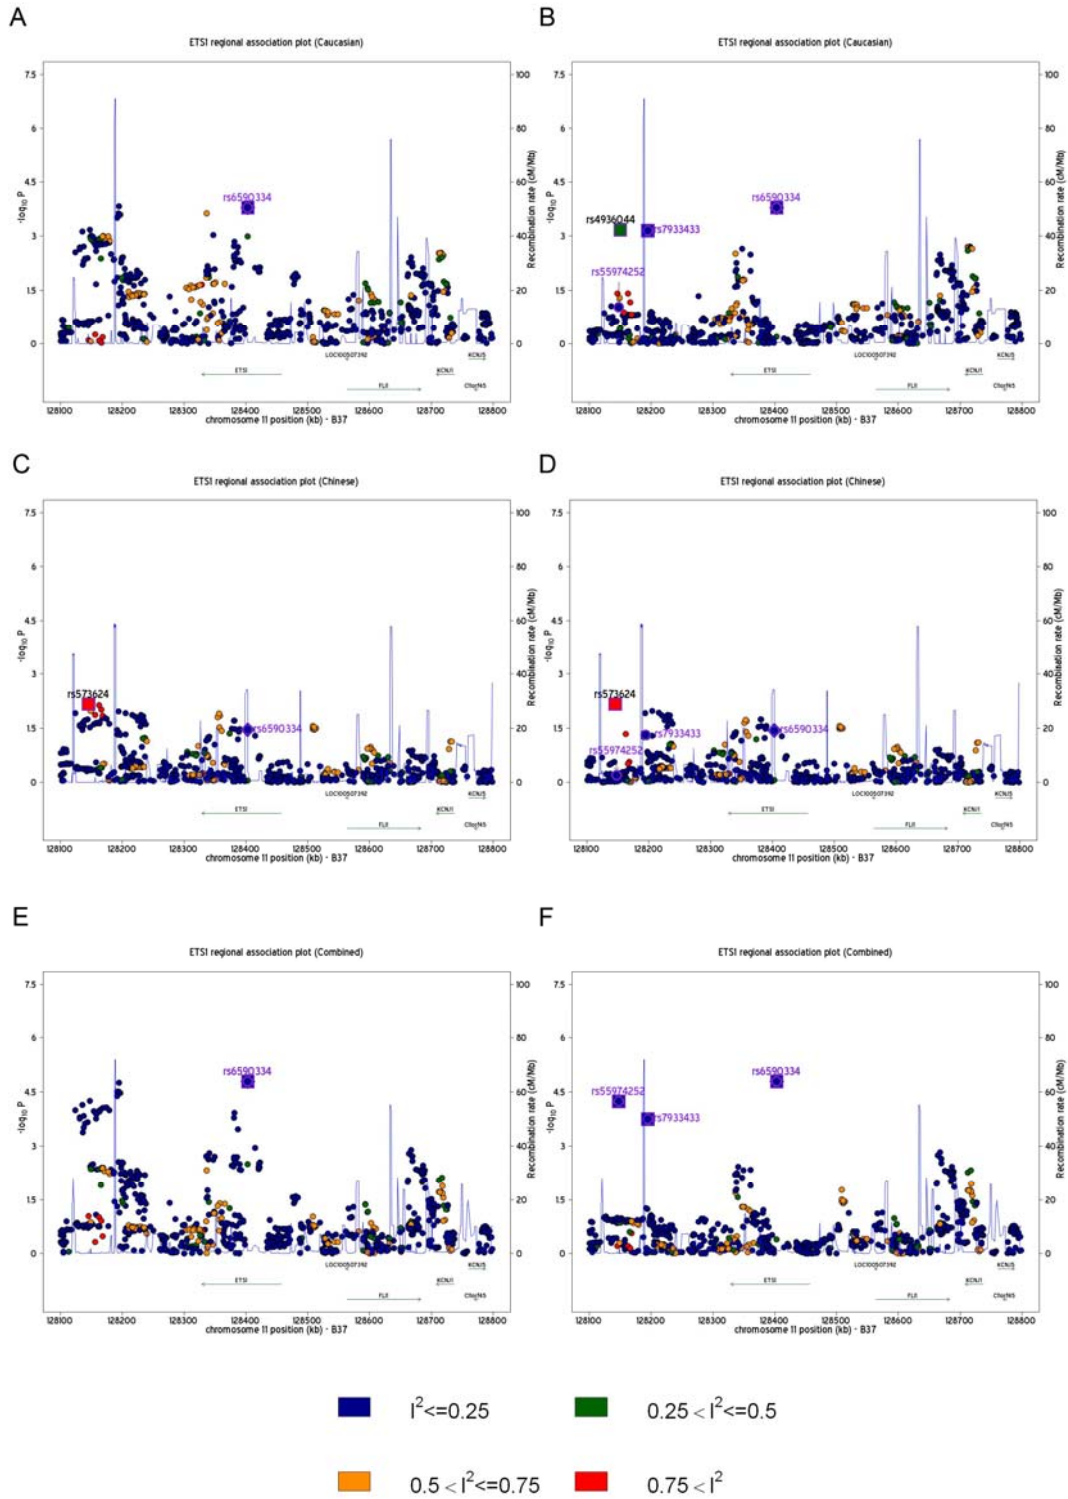

**f. ETS1**

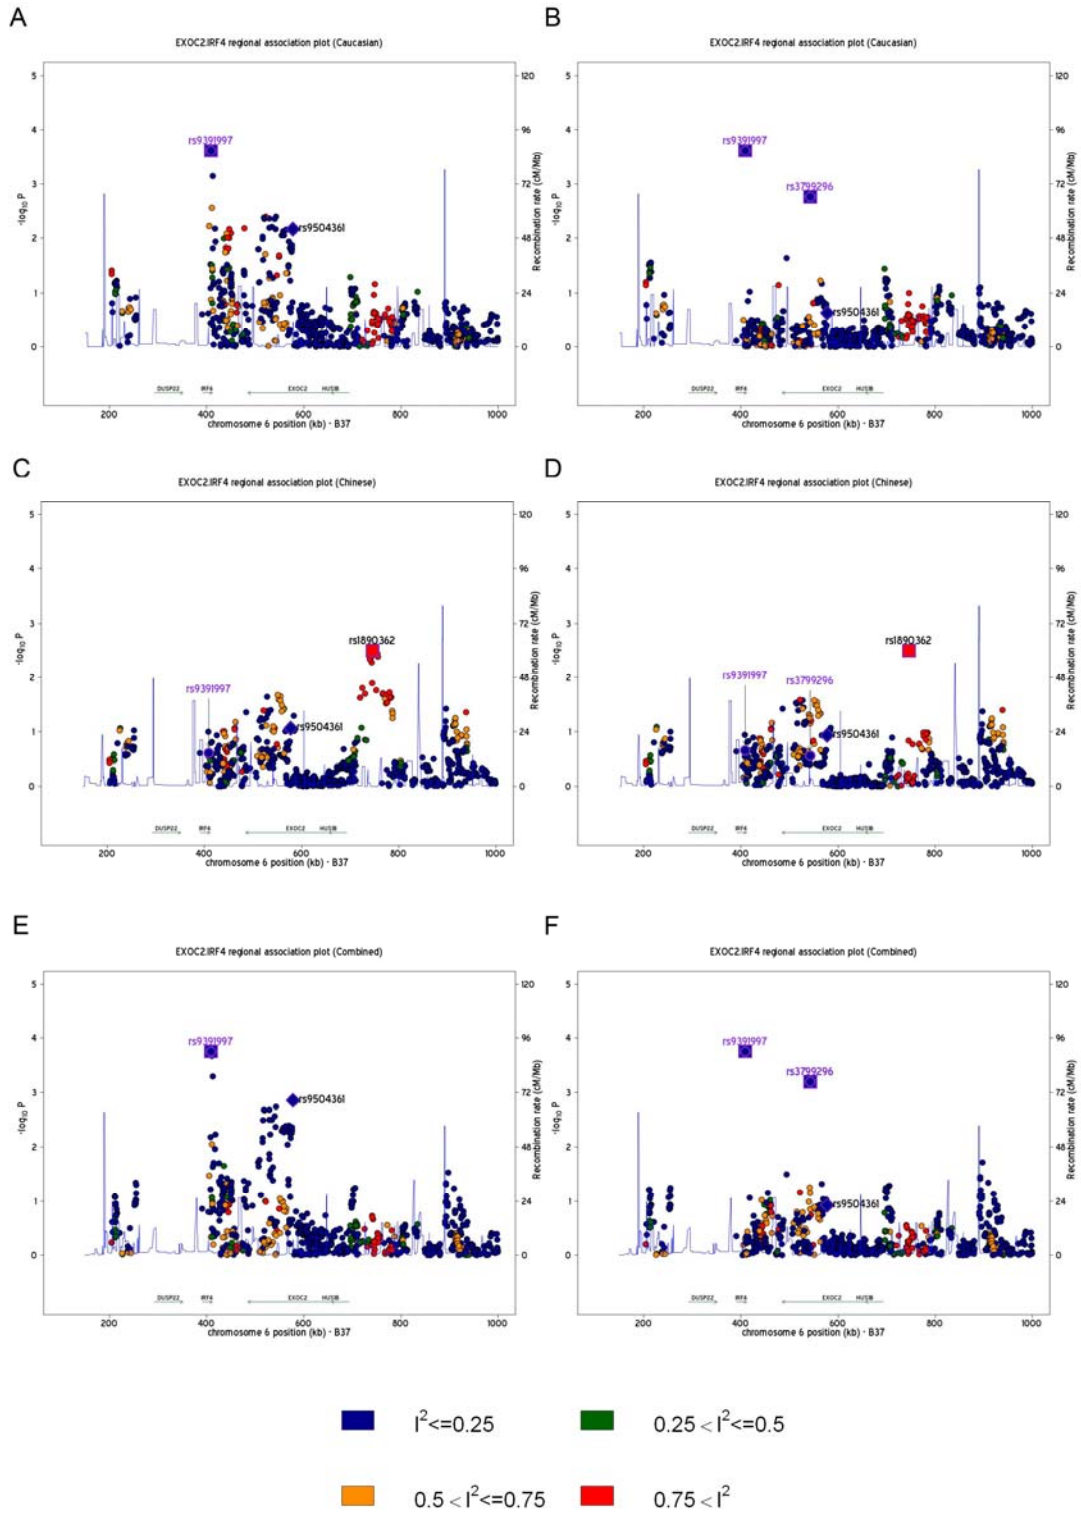

**g. EXOC2.IRF4**

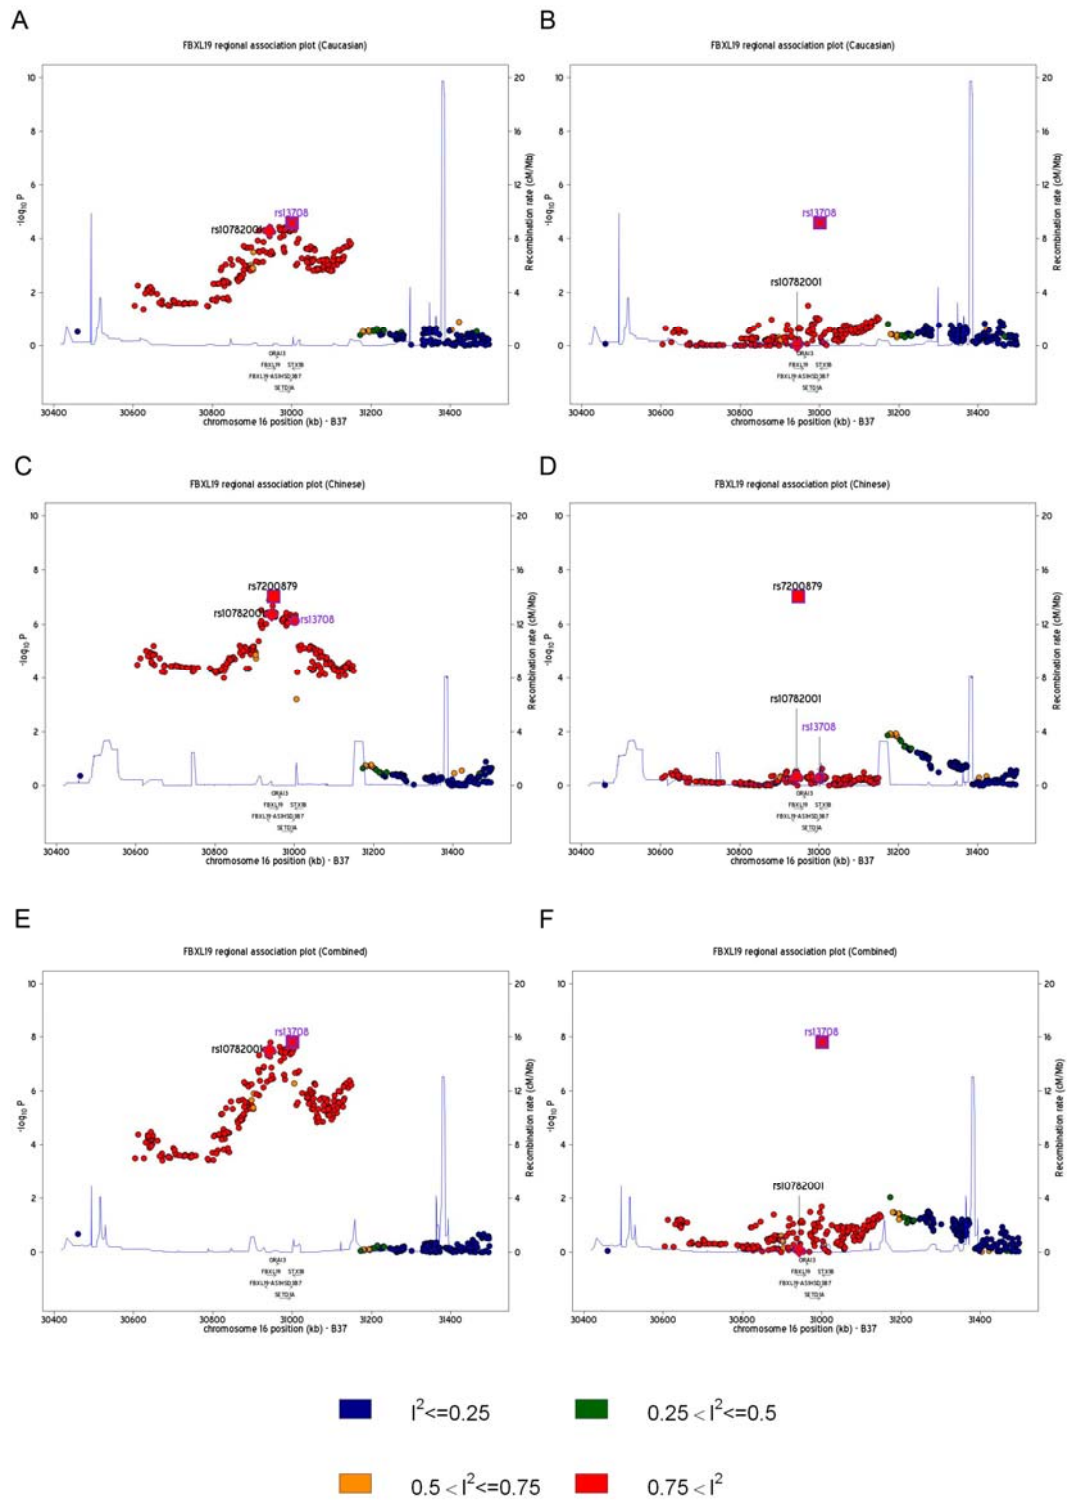

### h. FBXL19

A

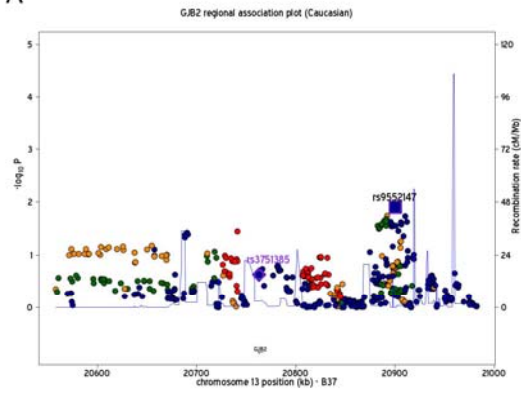

B

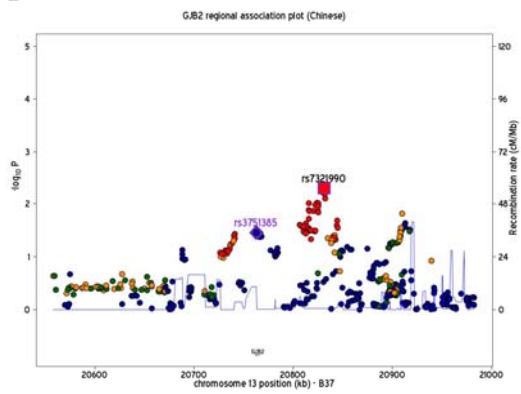

C

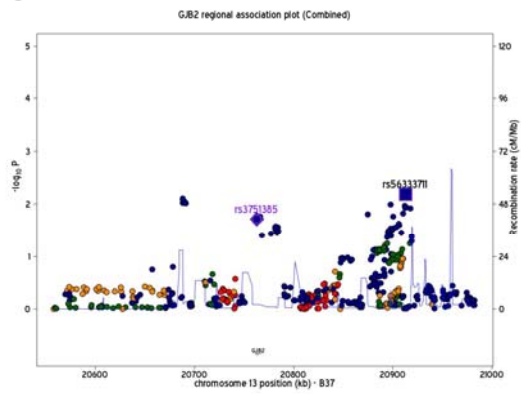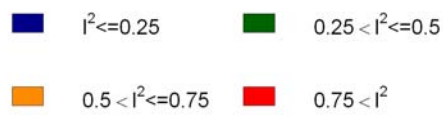

**i. GJB2**

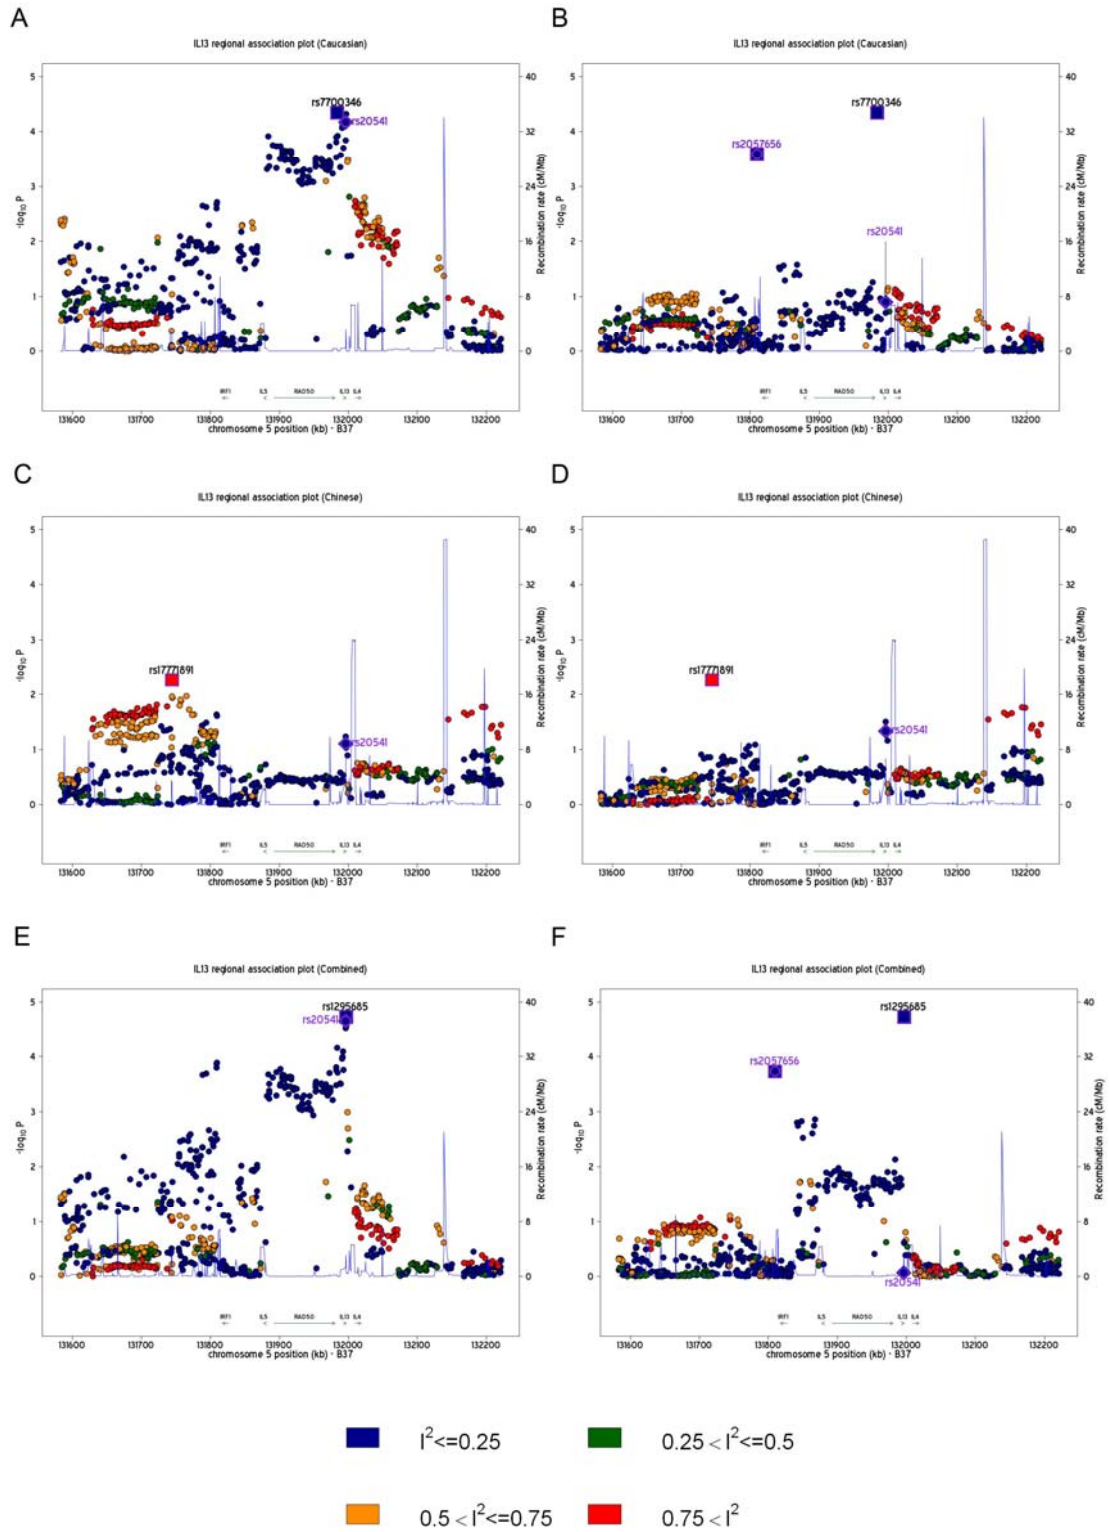

**j. IL13**



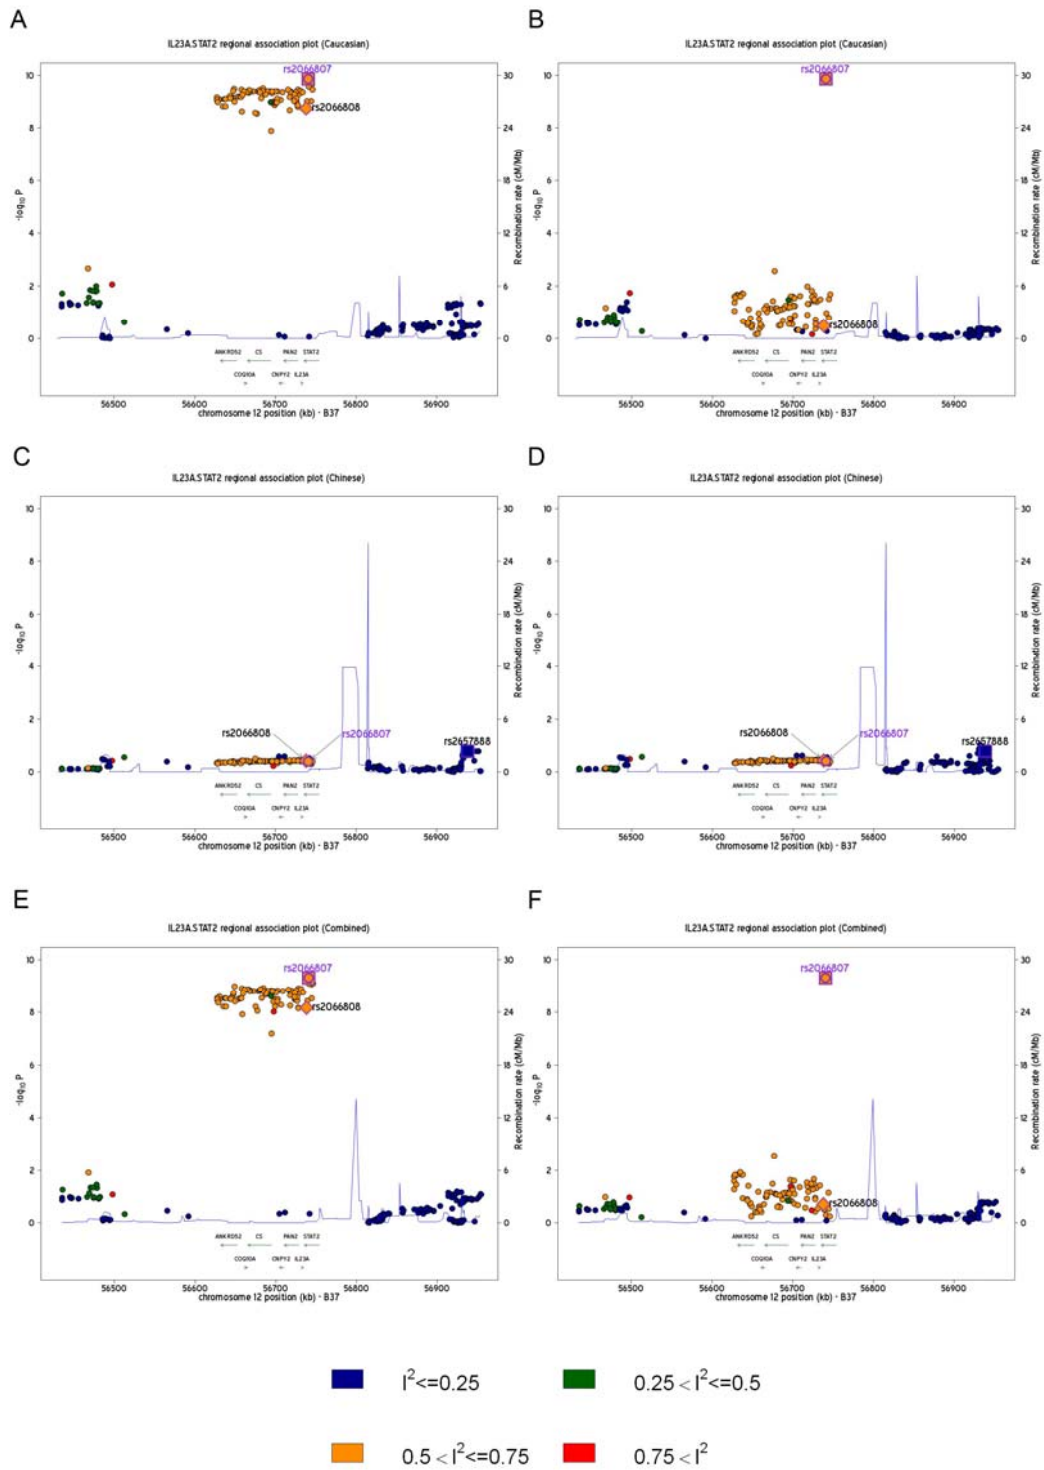

**k. IL23A.STAT2**

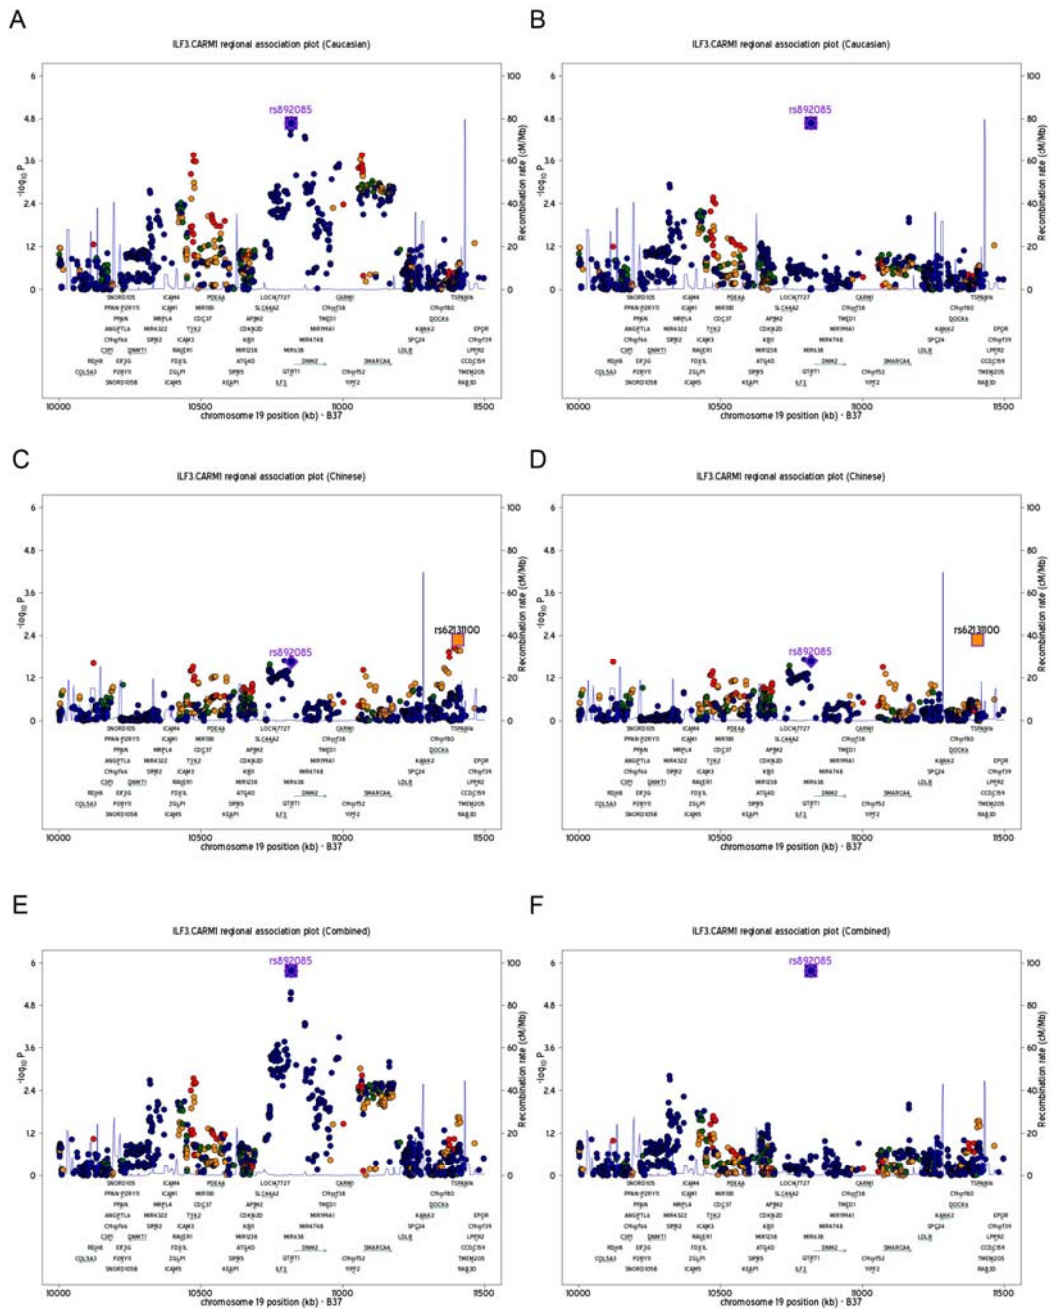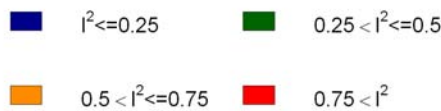

### 1. ILF3.CARM1

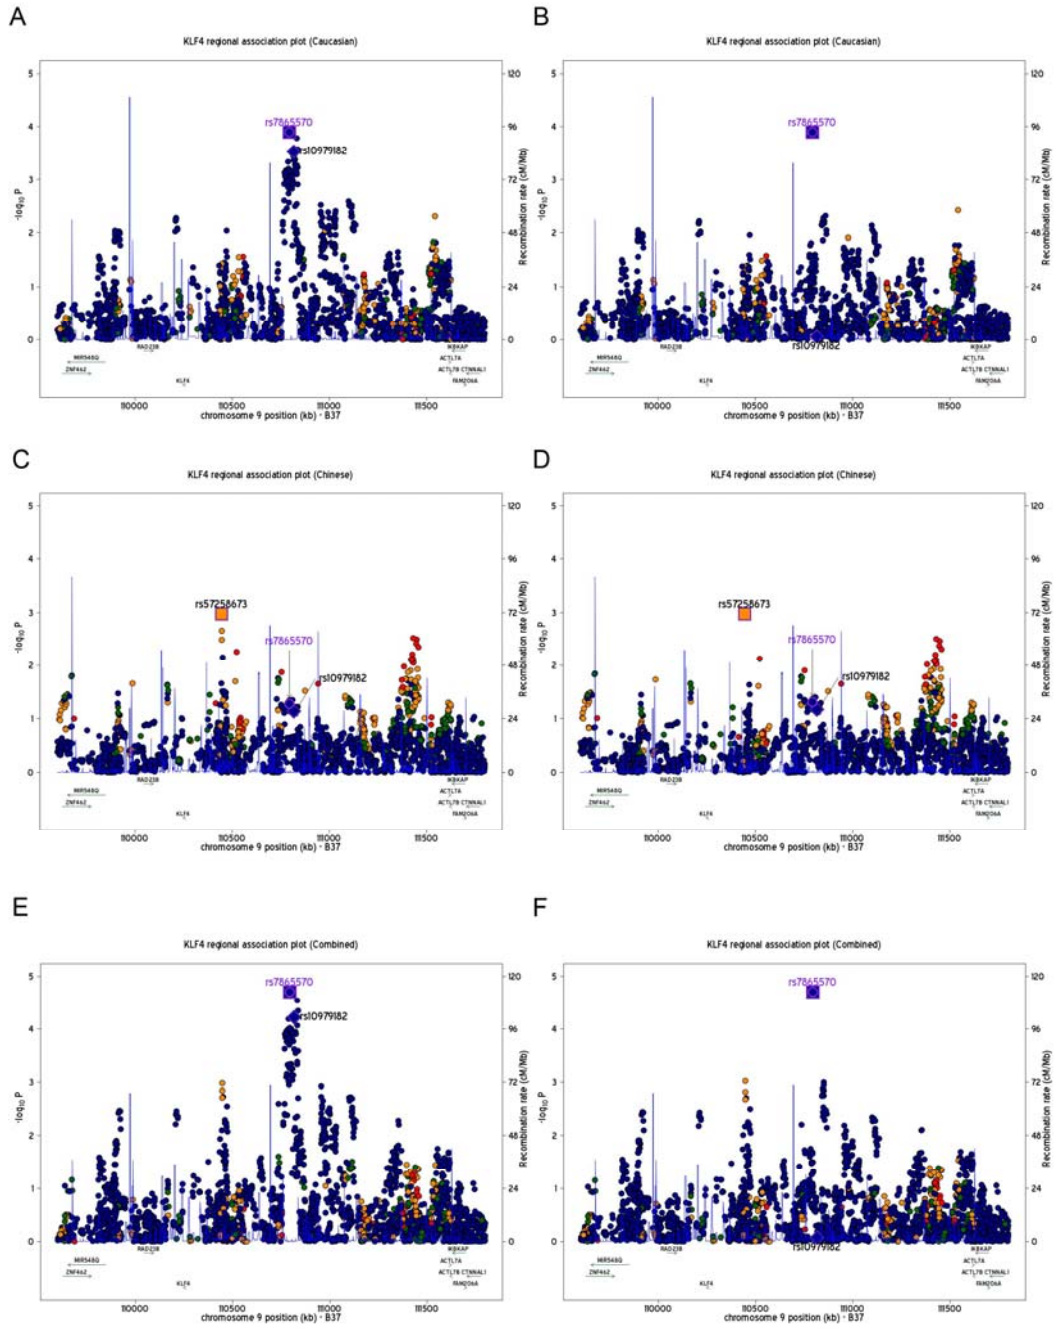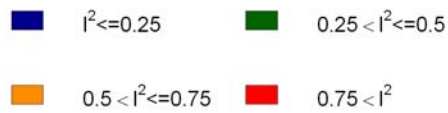

**m. KLF4**

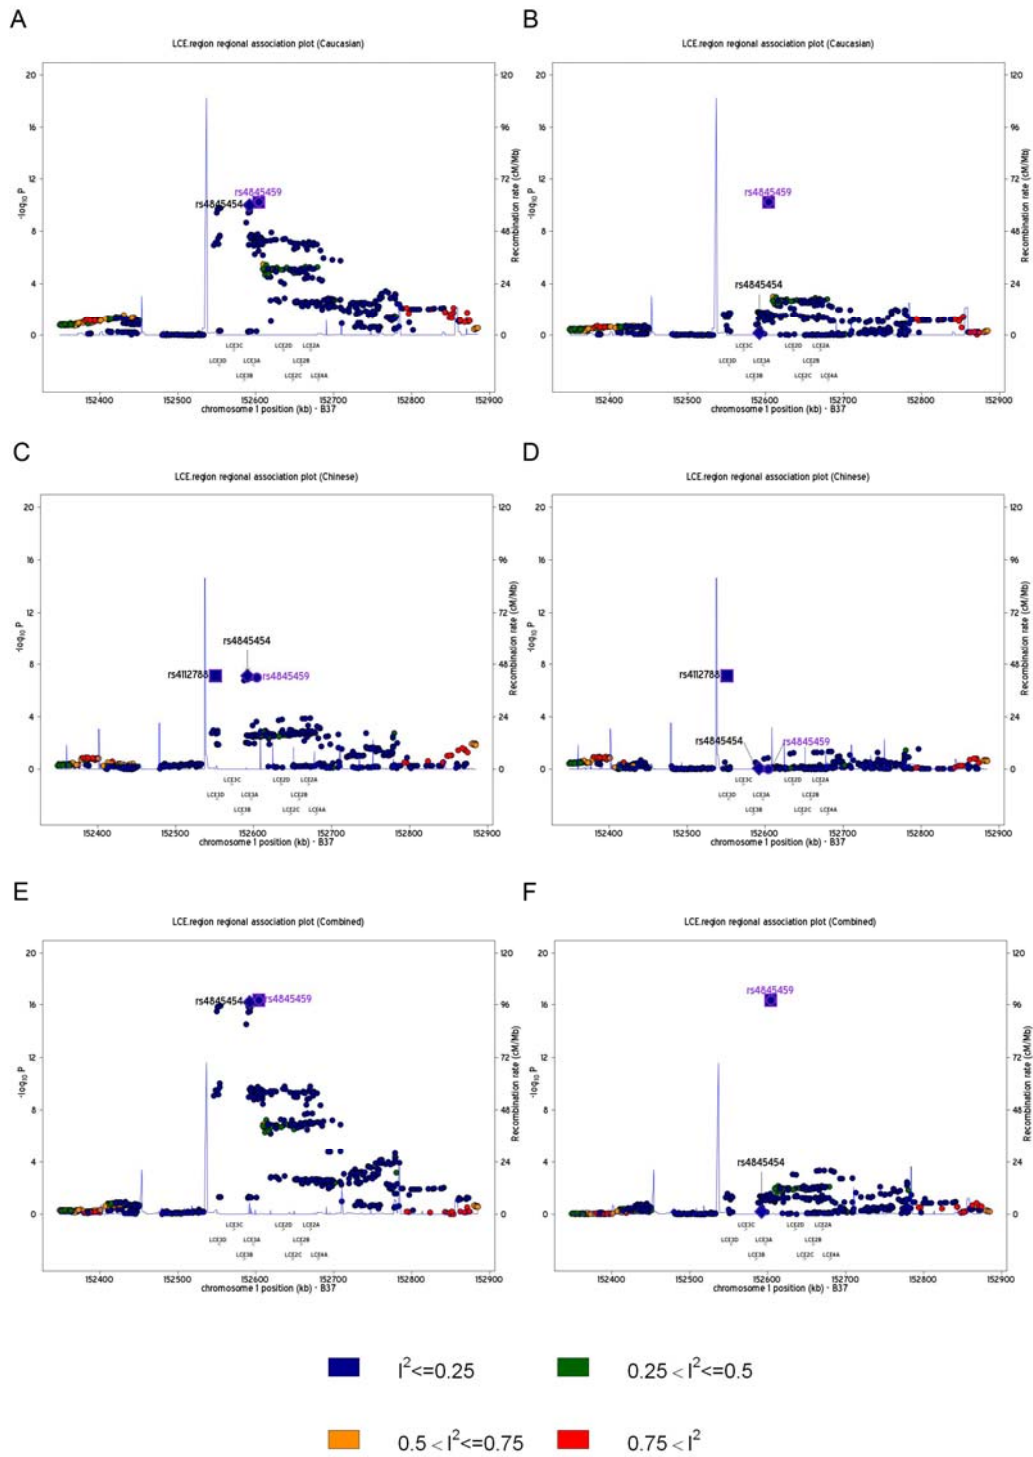

**n. LCE region**

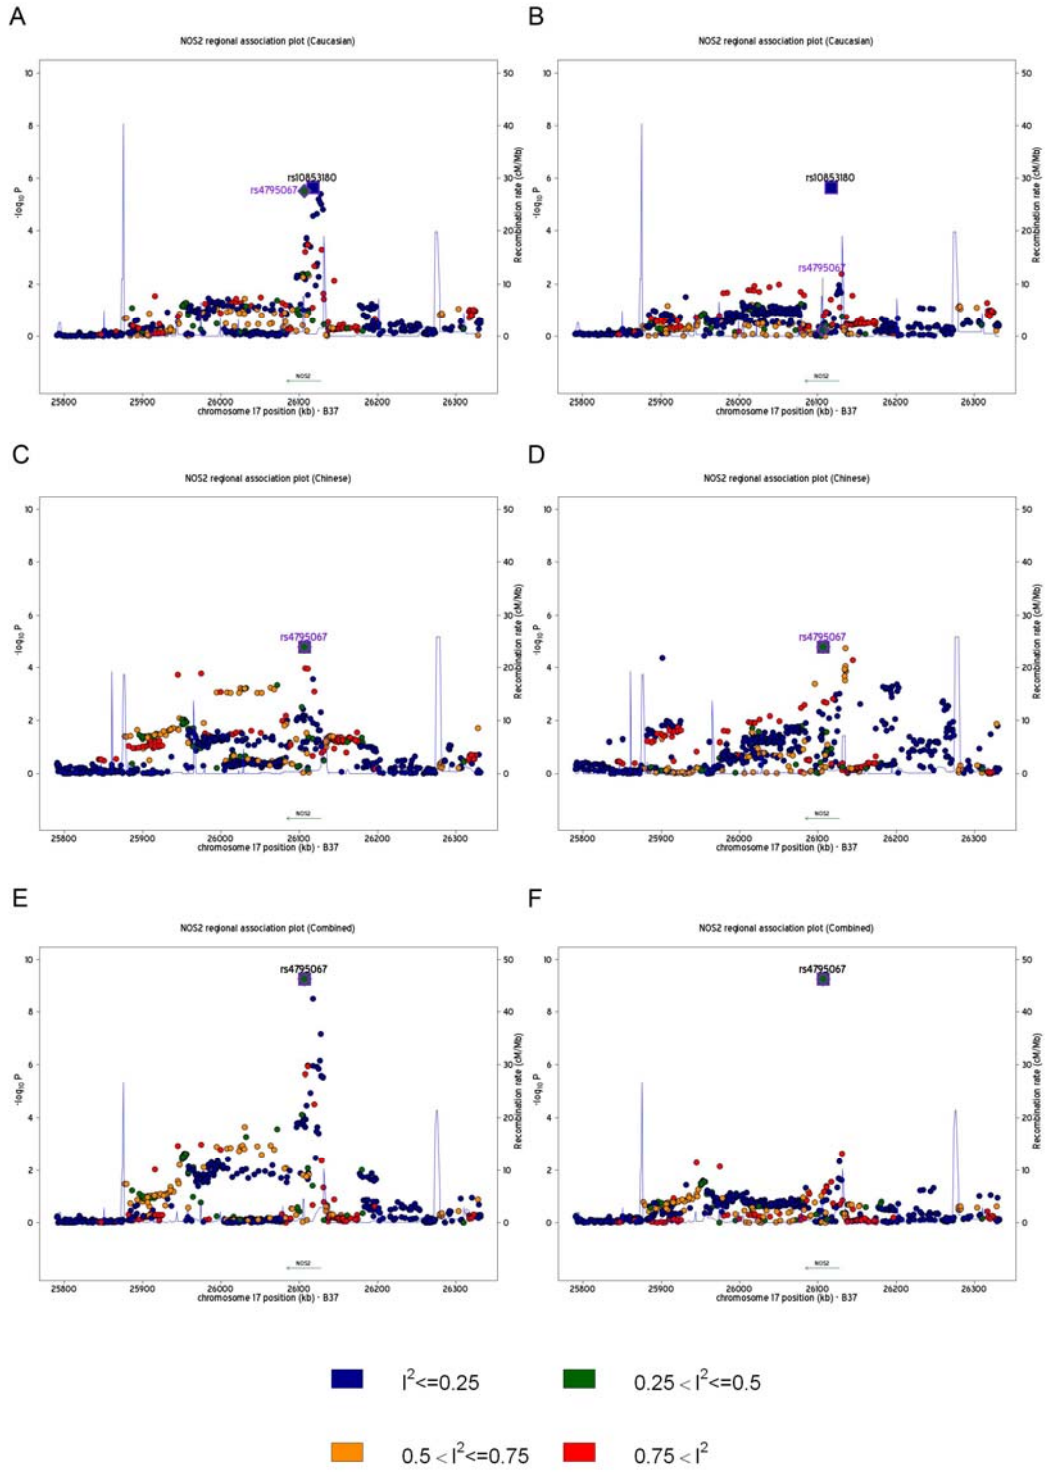

**o. NOS2**

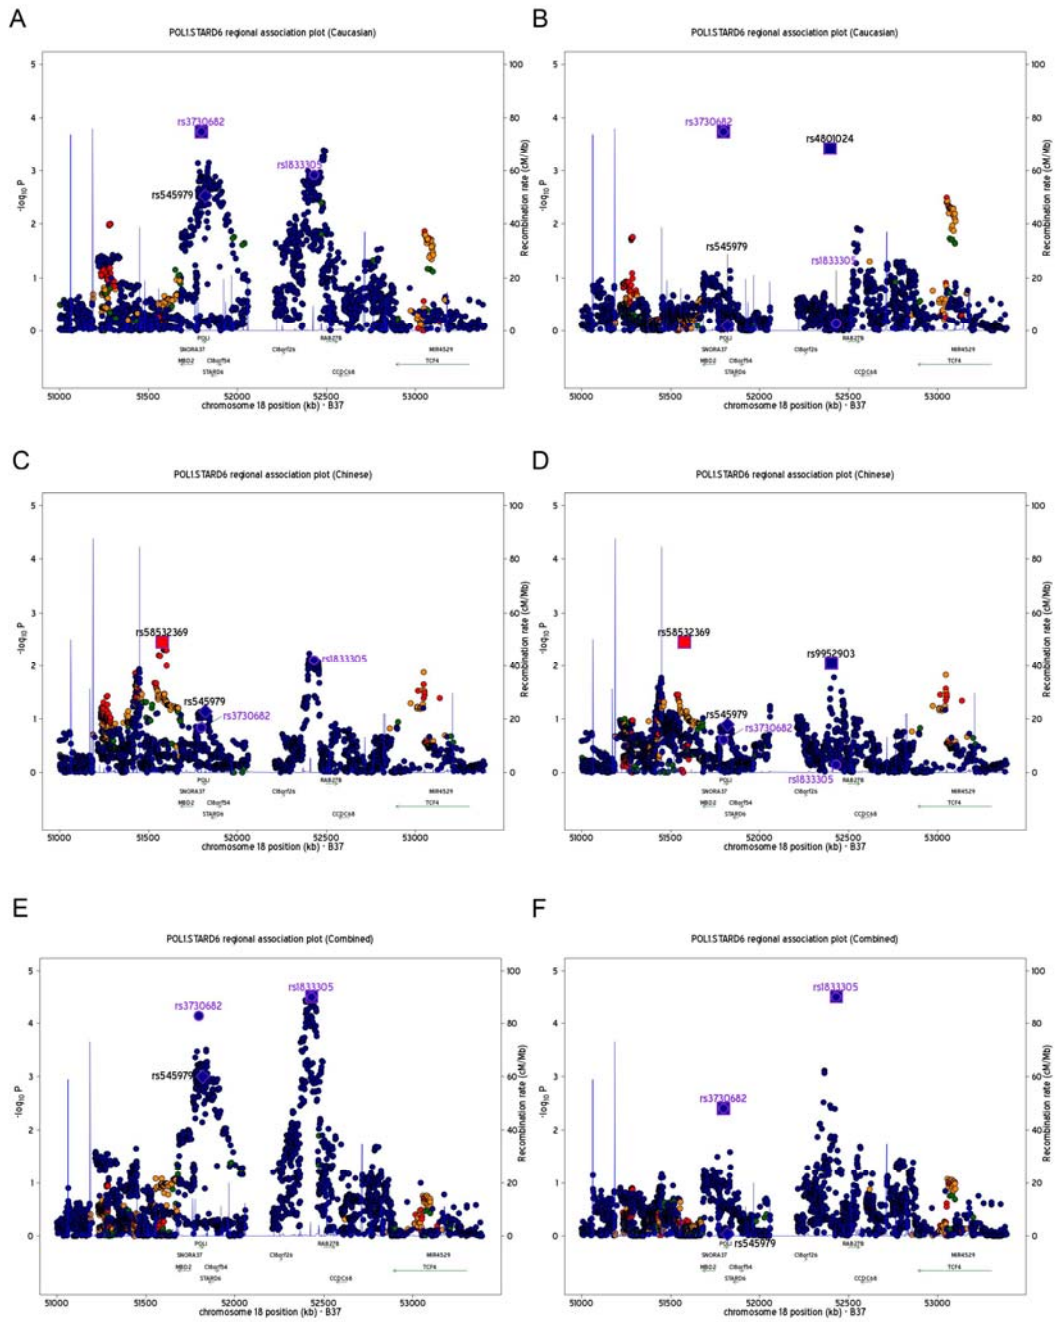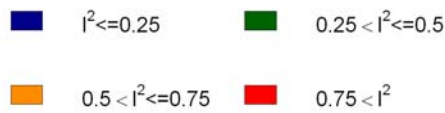

**p. POL1.STARD6**

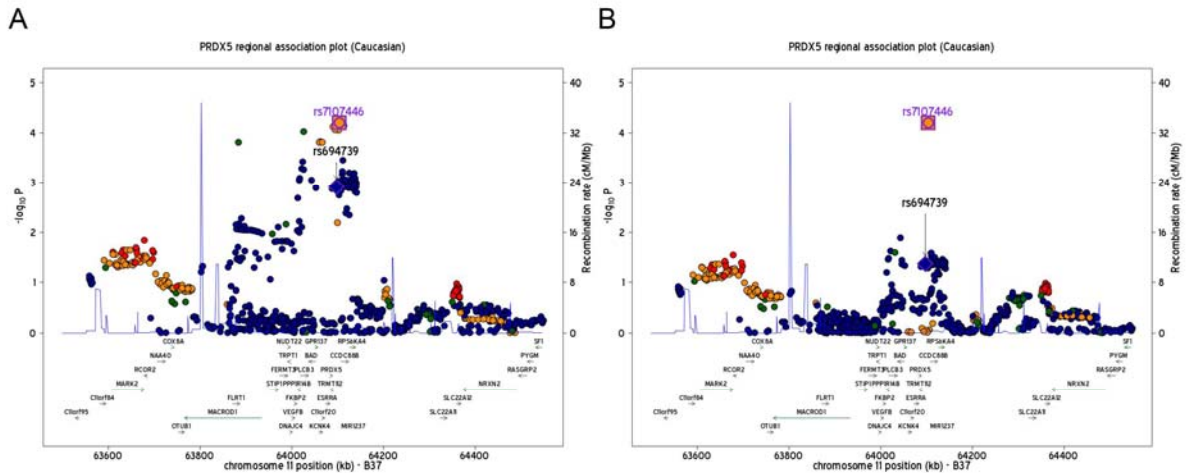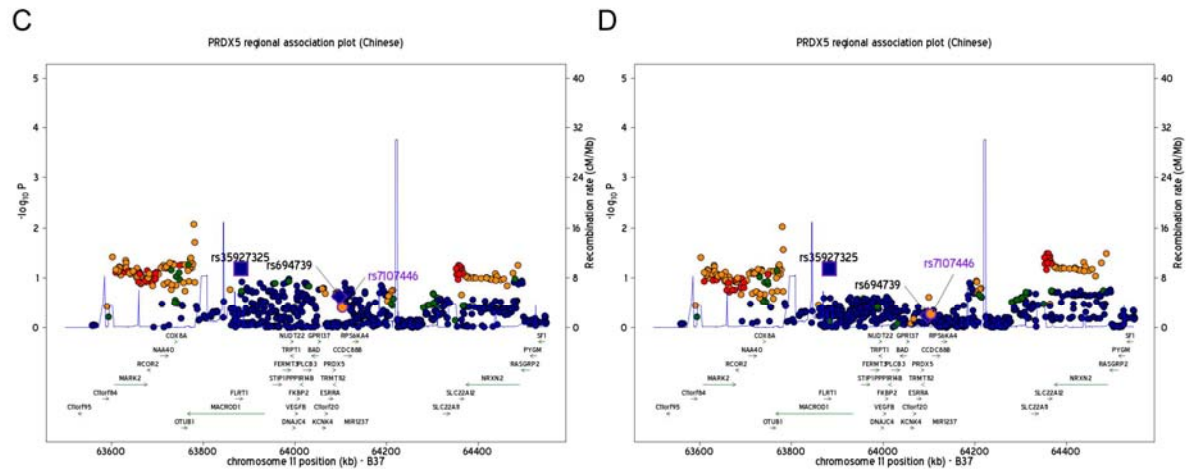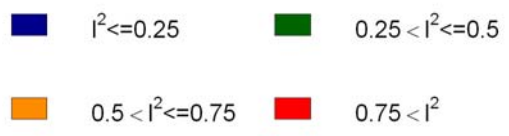

q. PRDX5





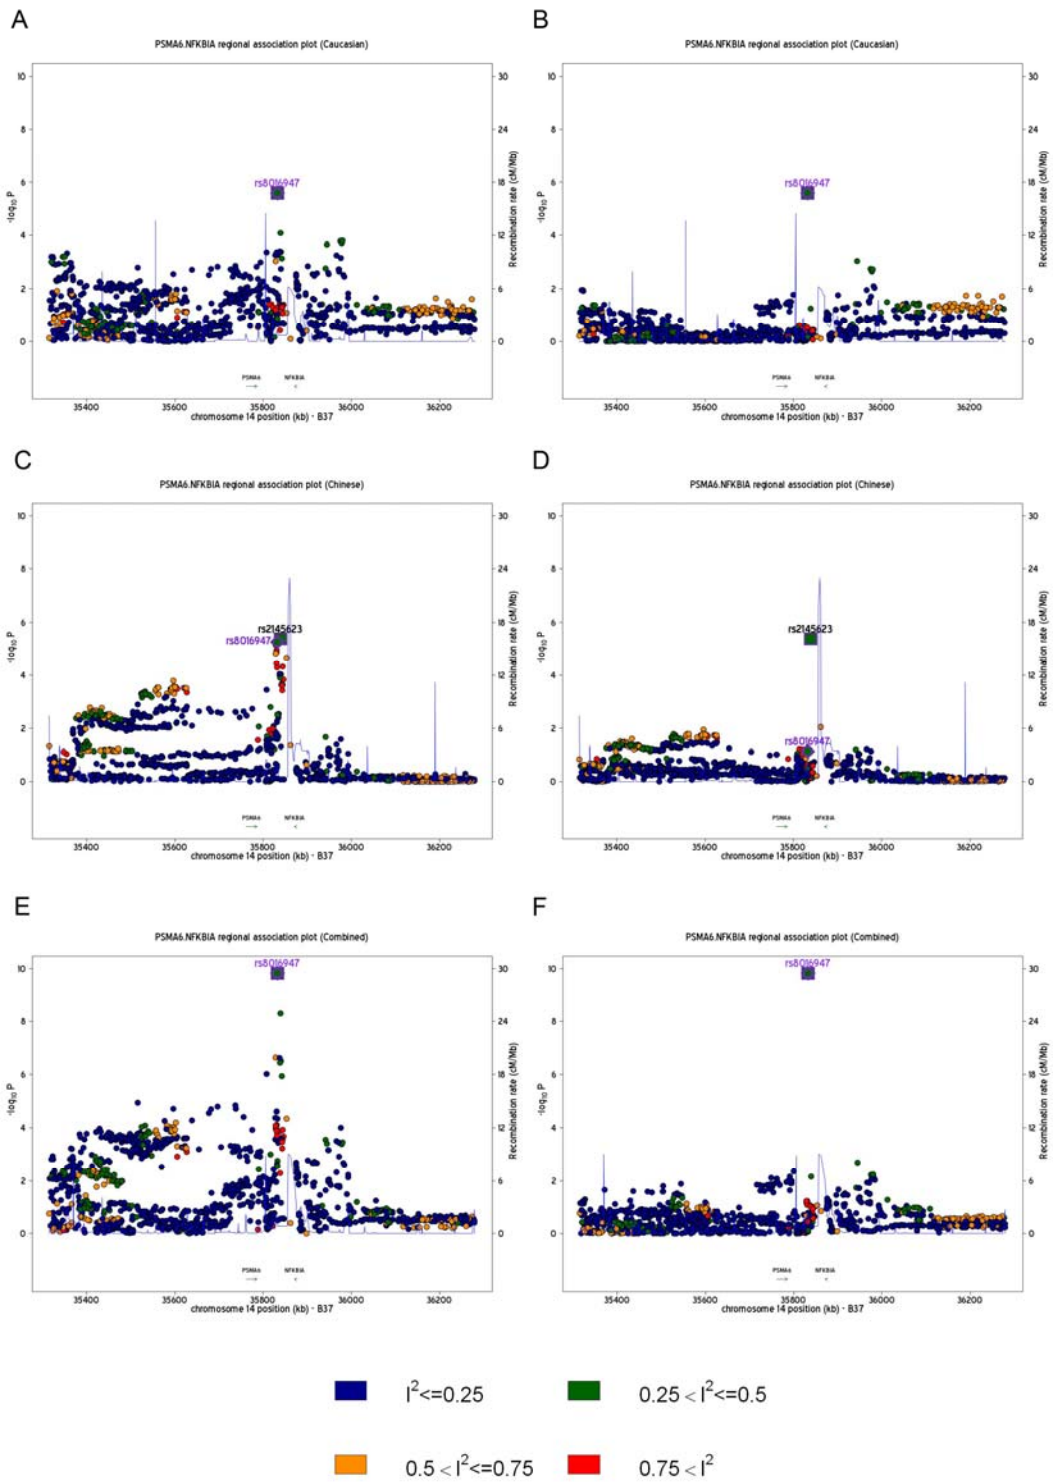

**s. PSMA6.NFKBIA**

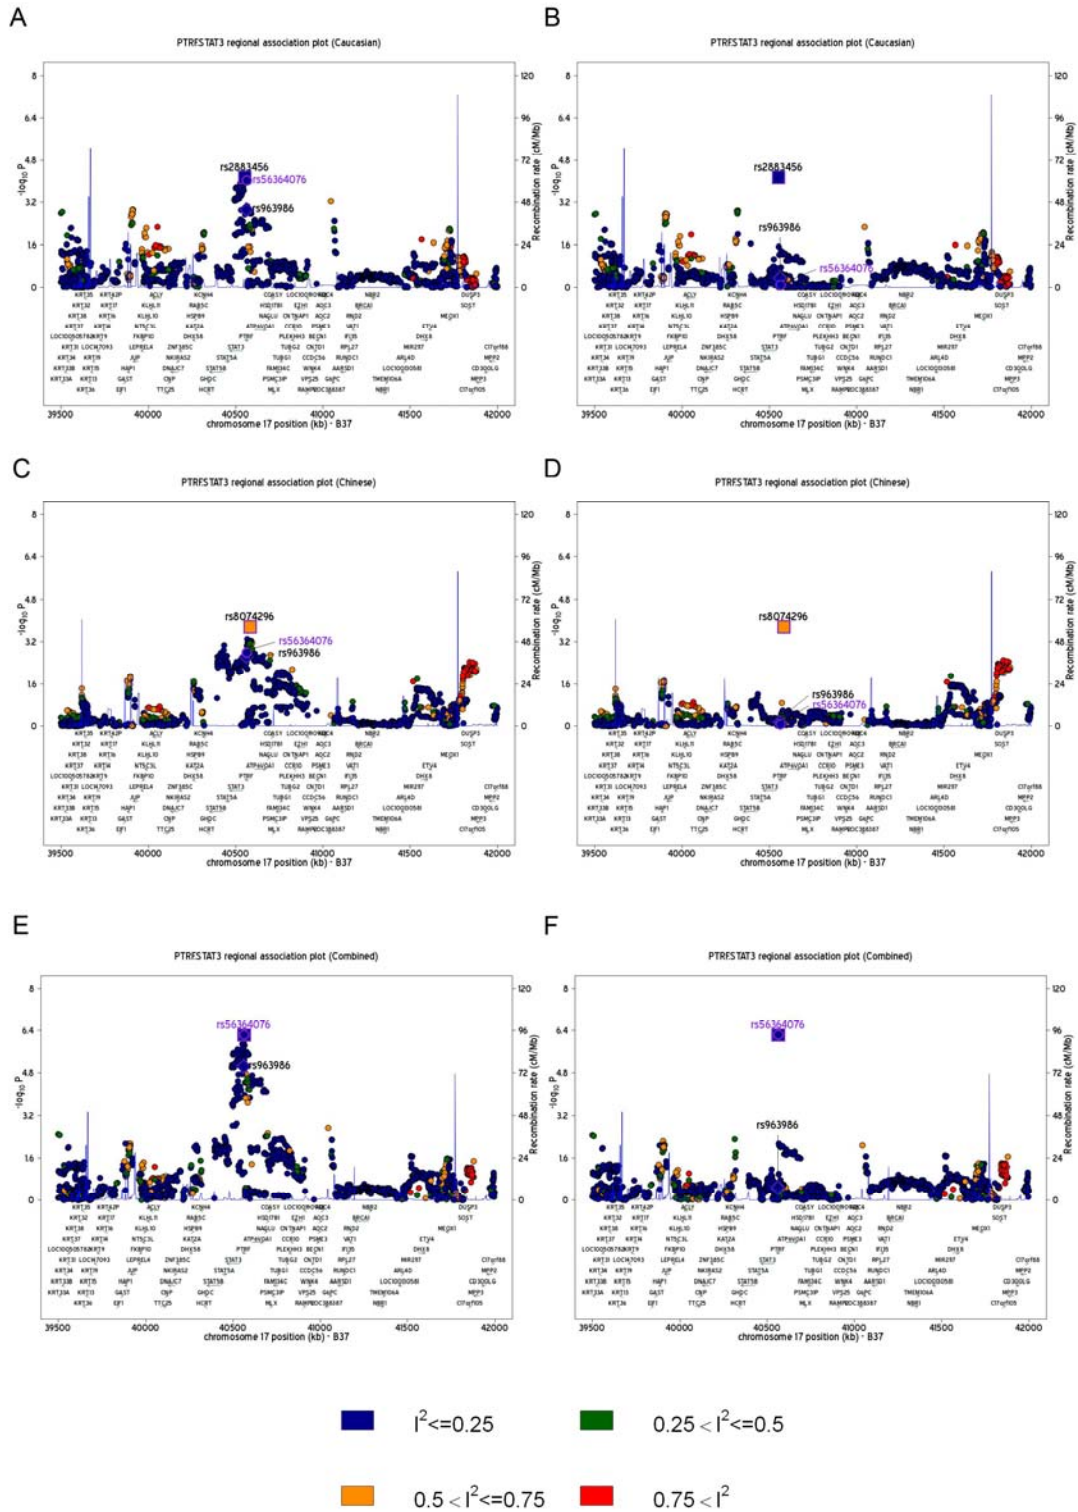

t. PTRF. STAT3

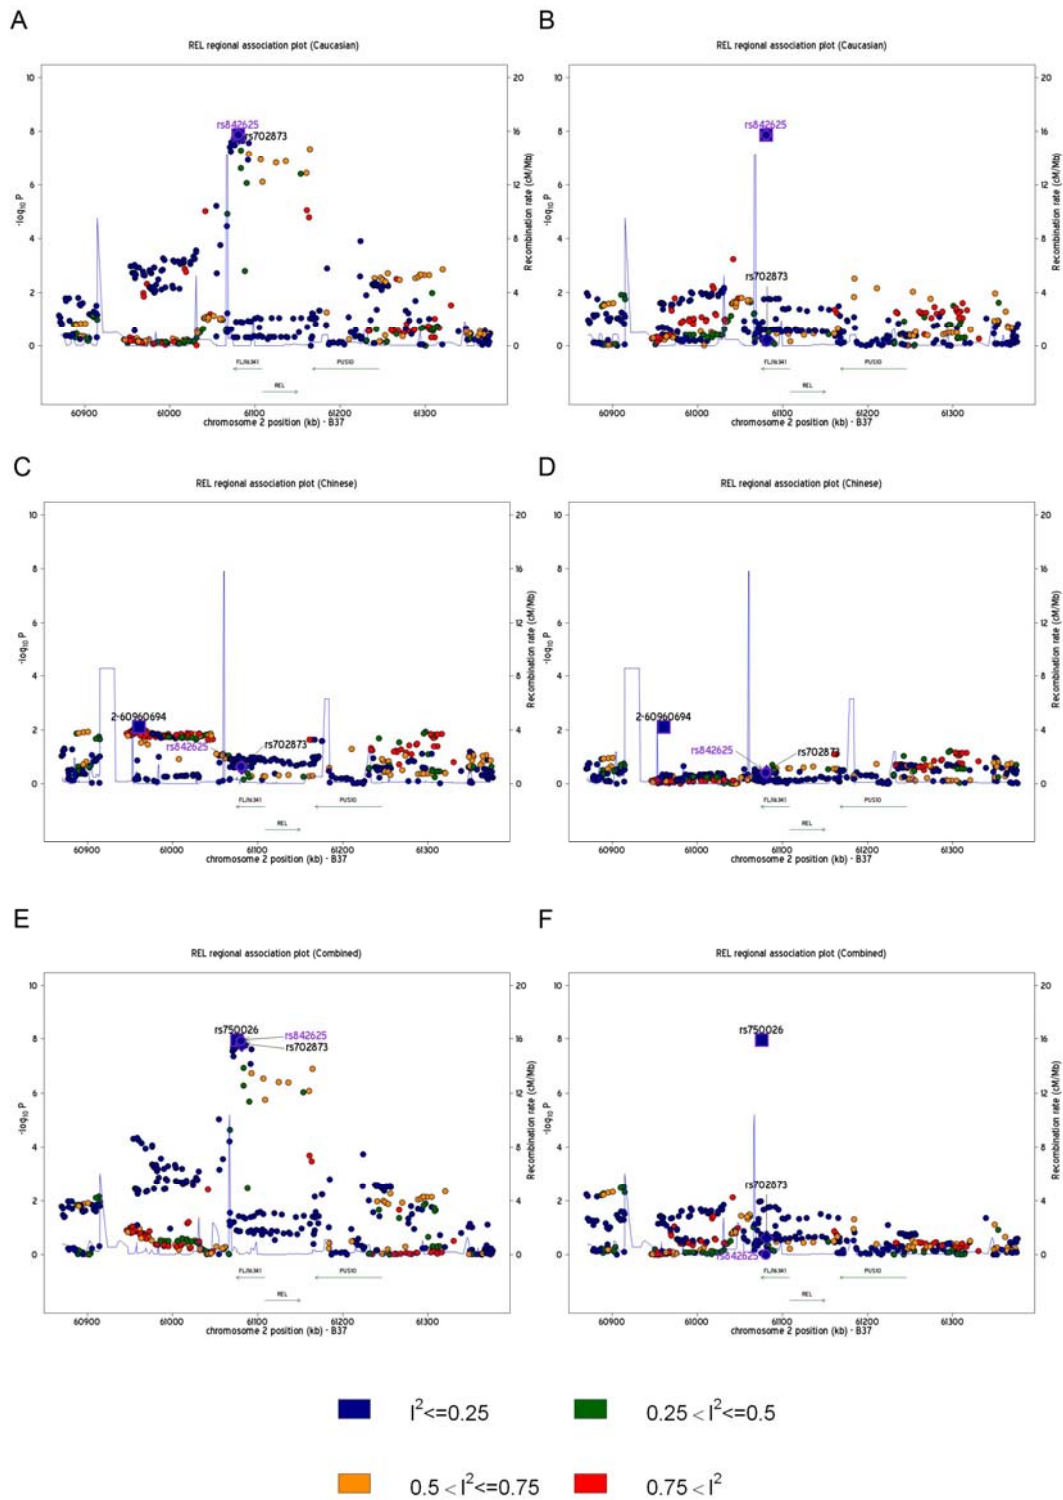

**u. REL**

A

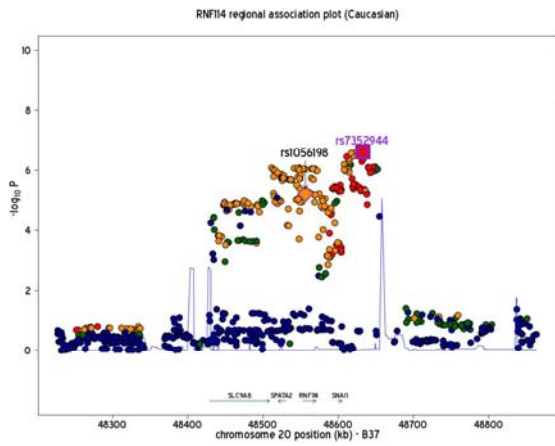

B

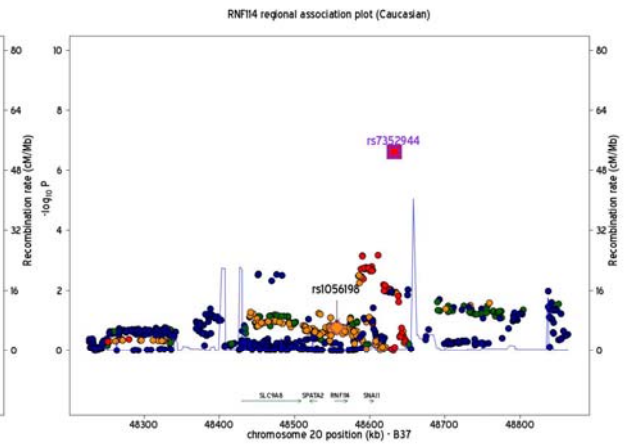

C

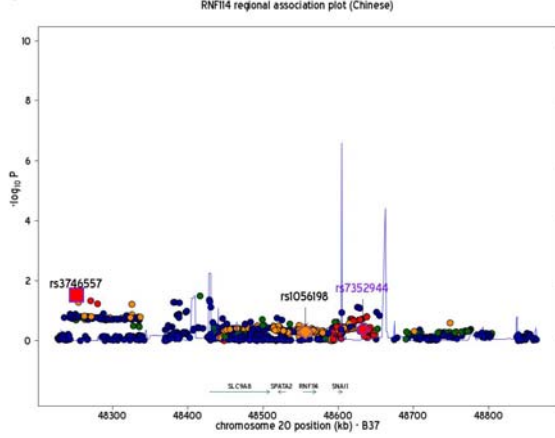

D

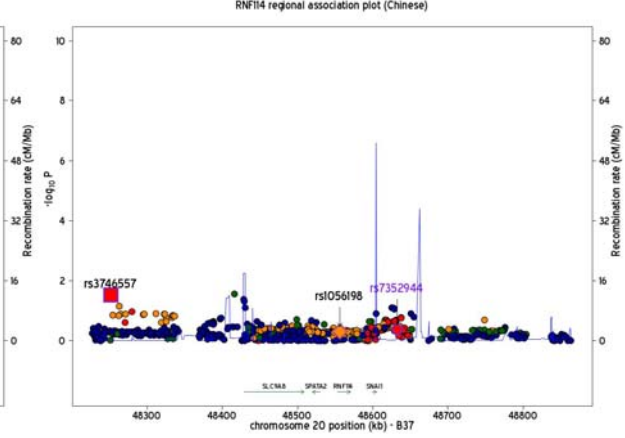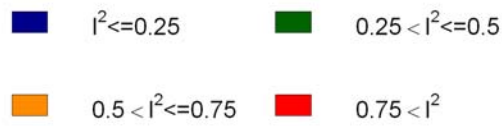

v. RNF114

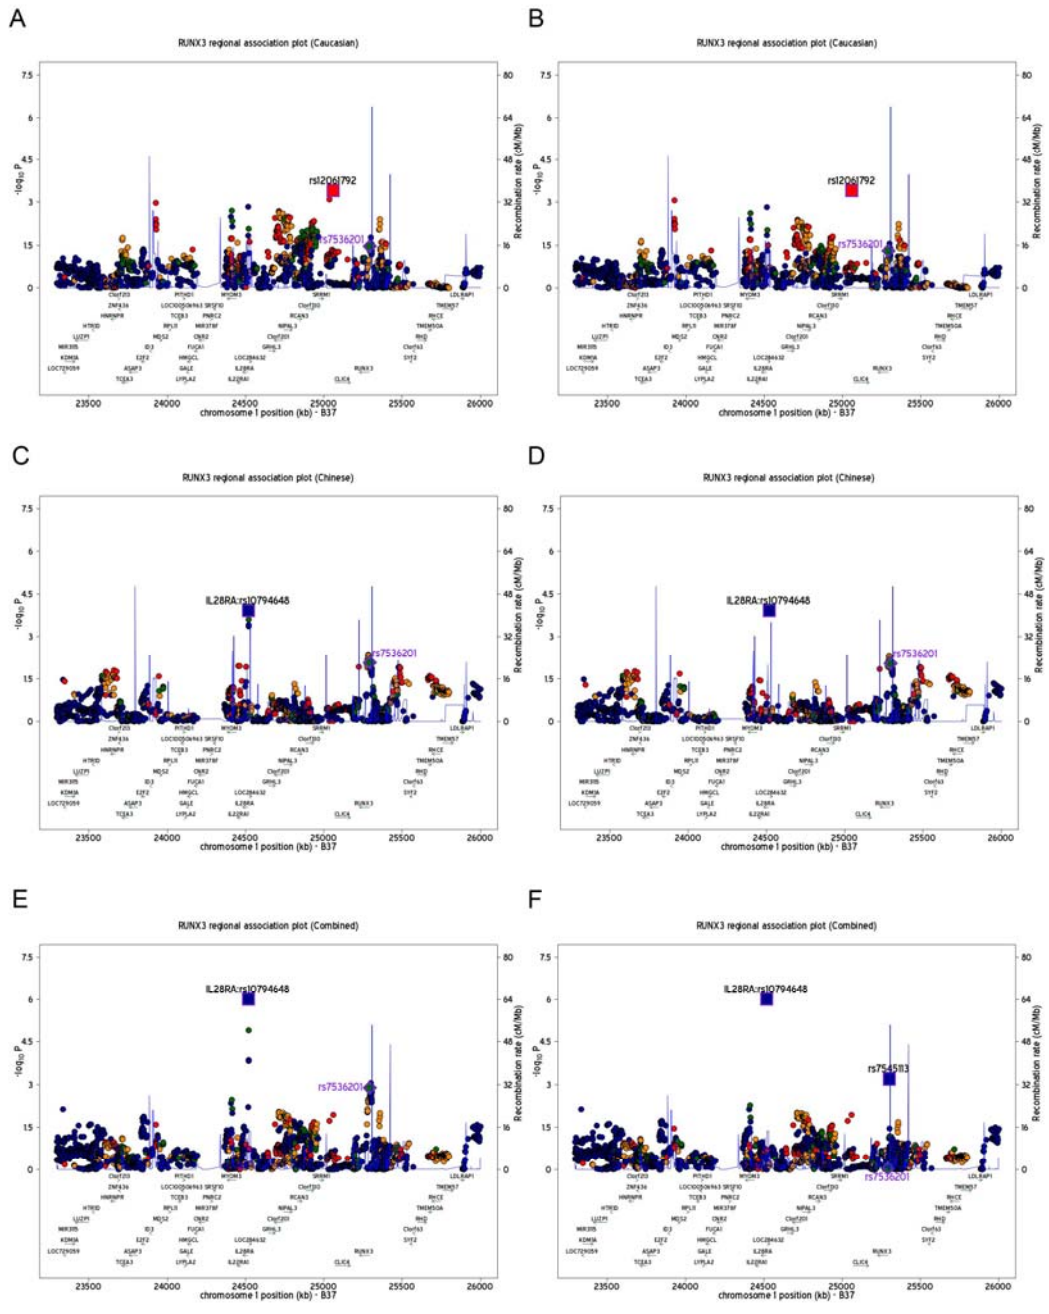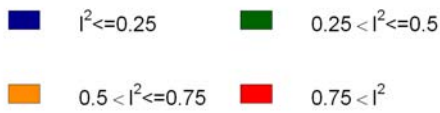

w. RUNX3

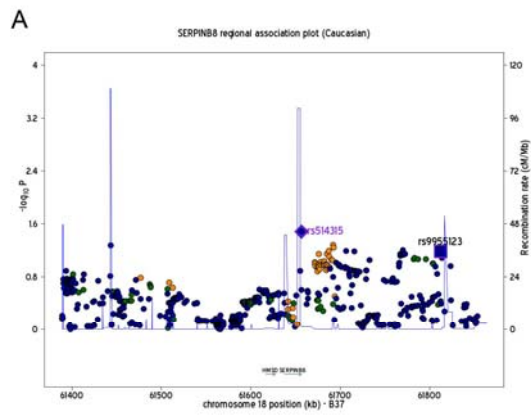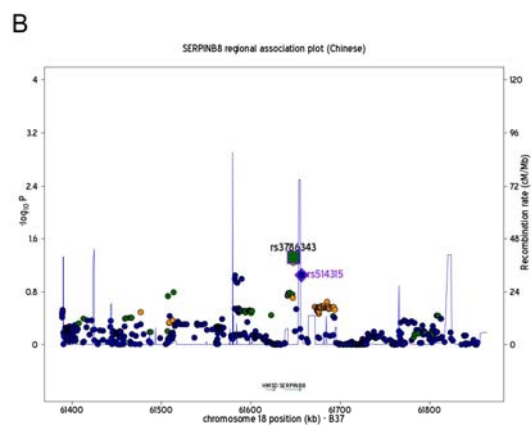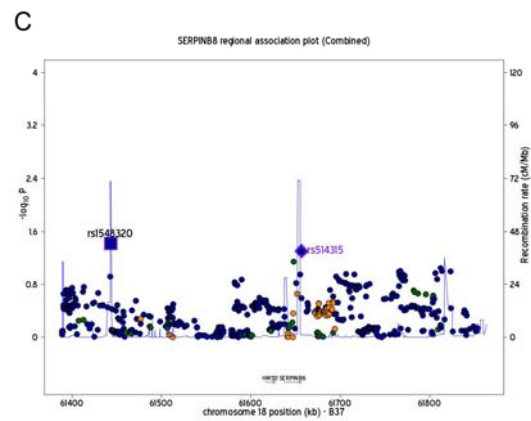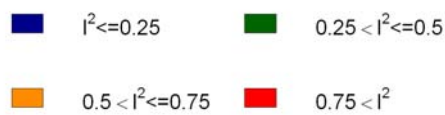

**x. SERPINB8**

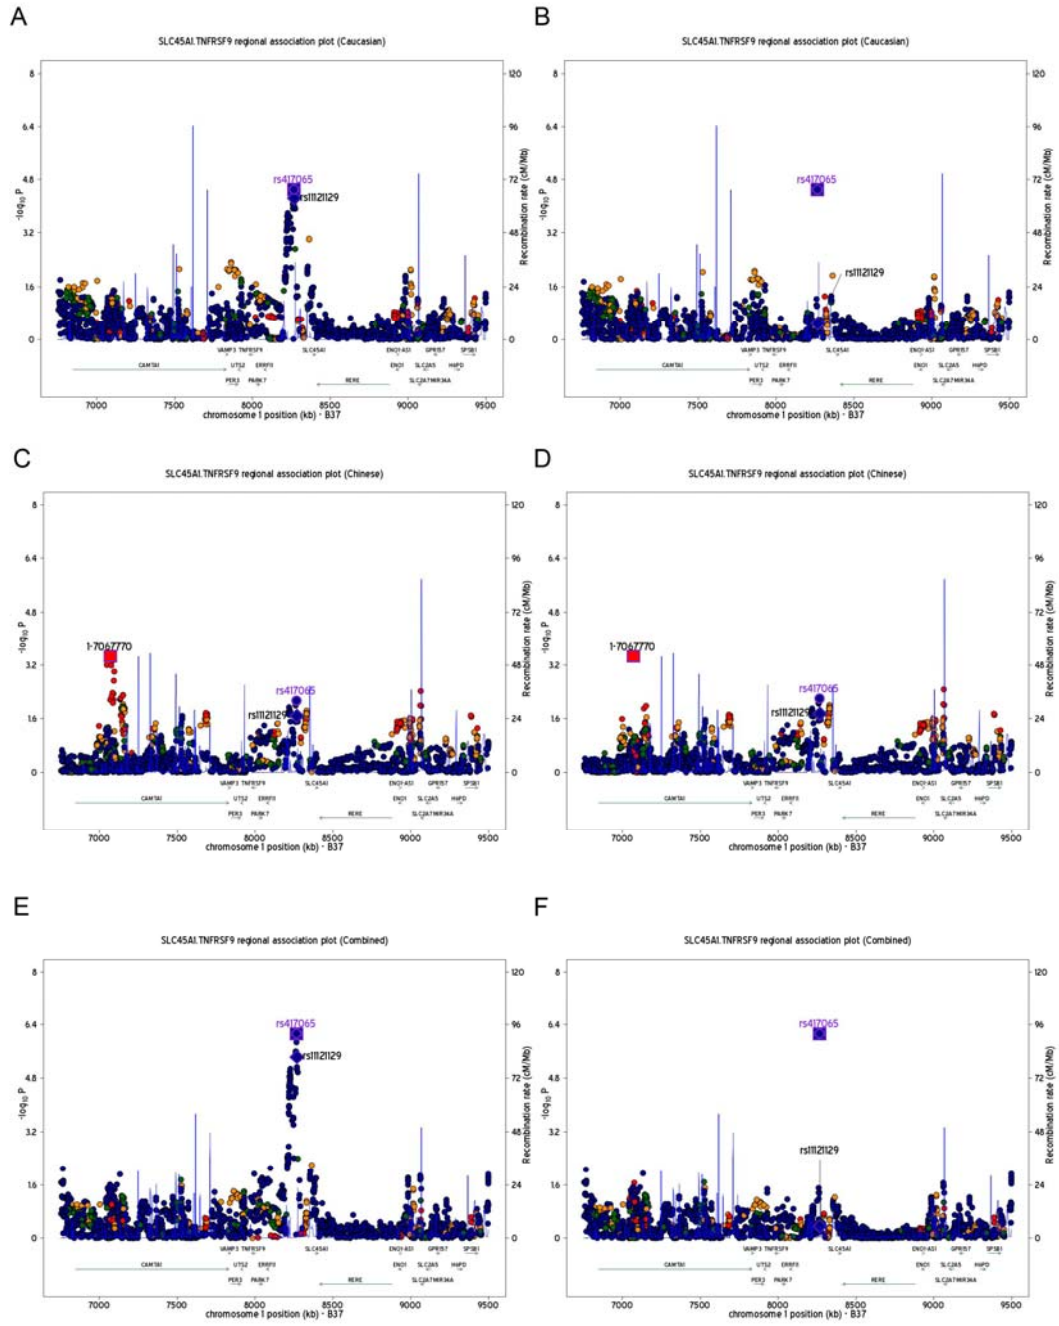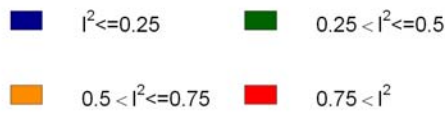

y. SLC45A1.TNFRSF9

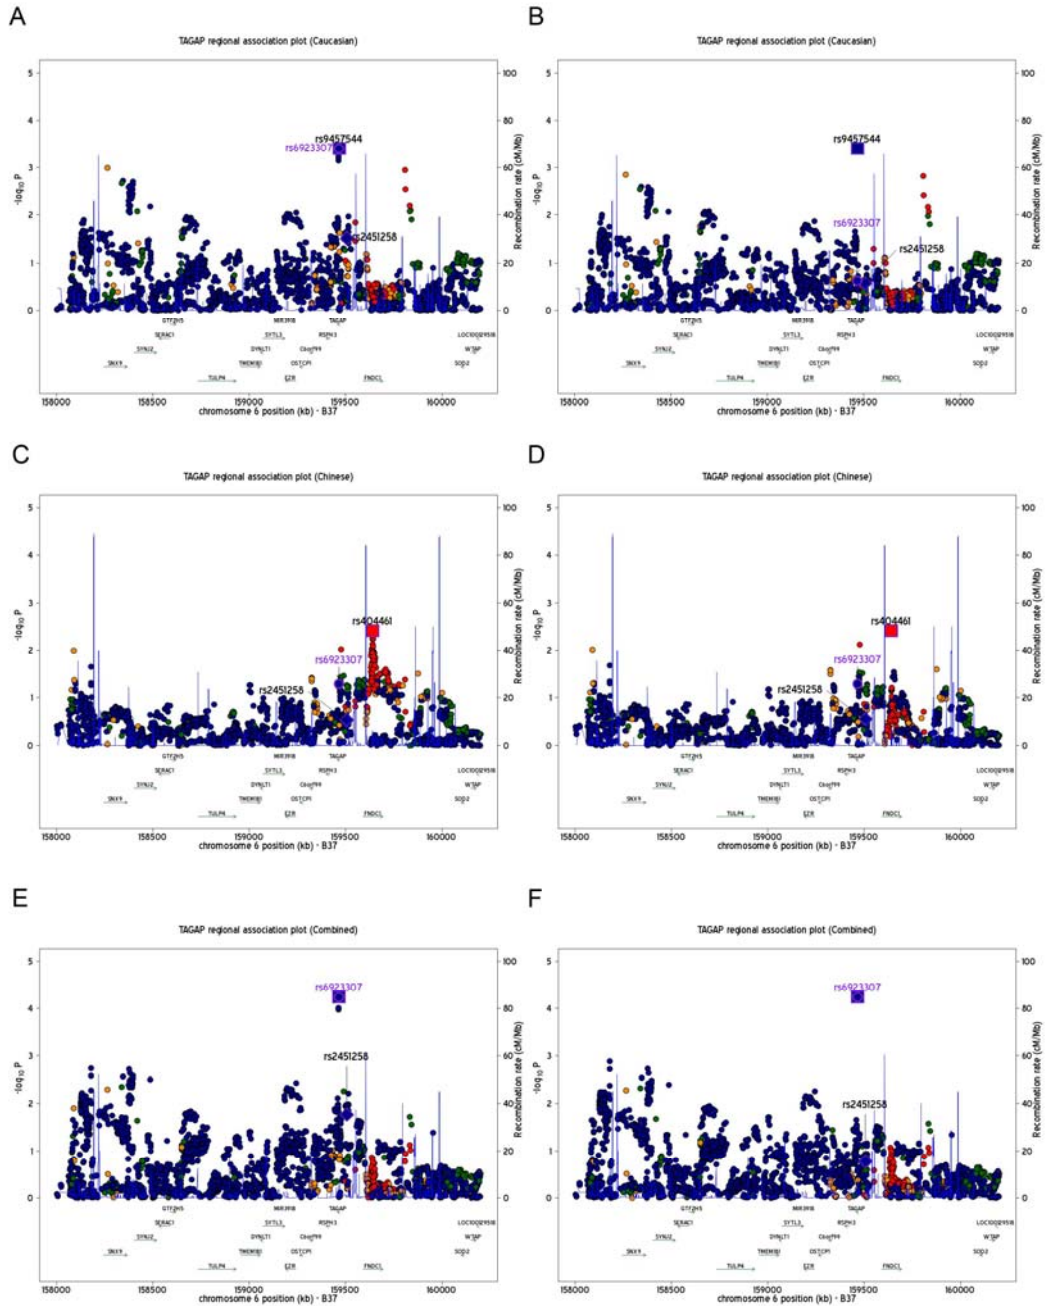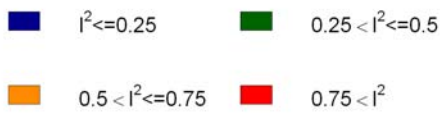

**z. TAGAP**



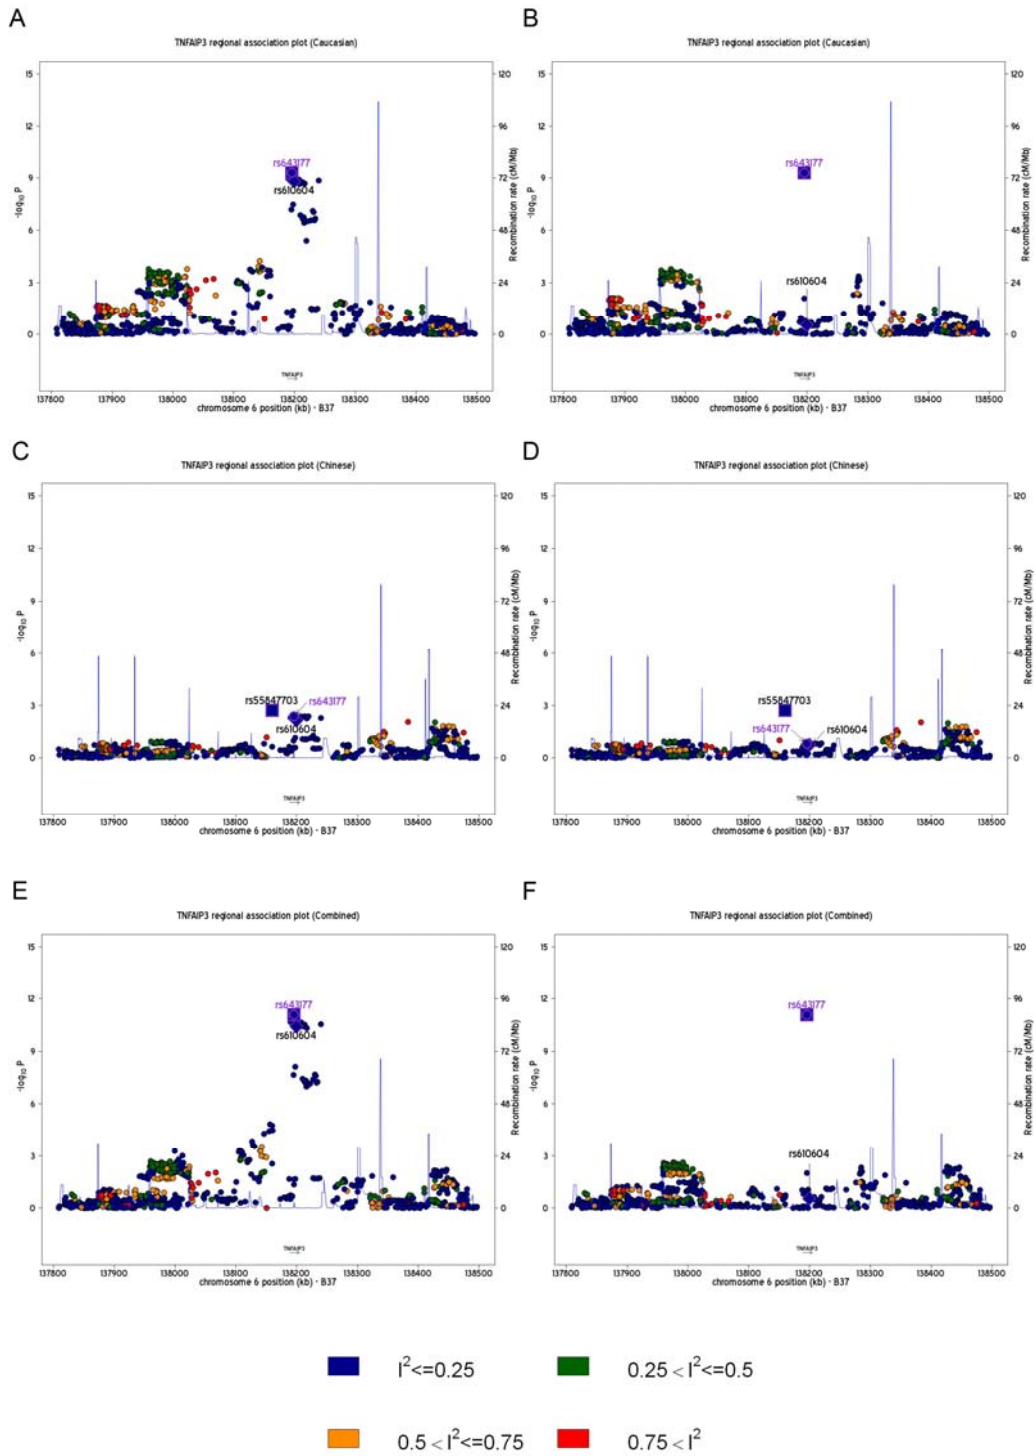

**aa. TNFAIP3**

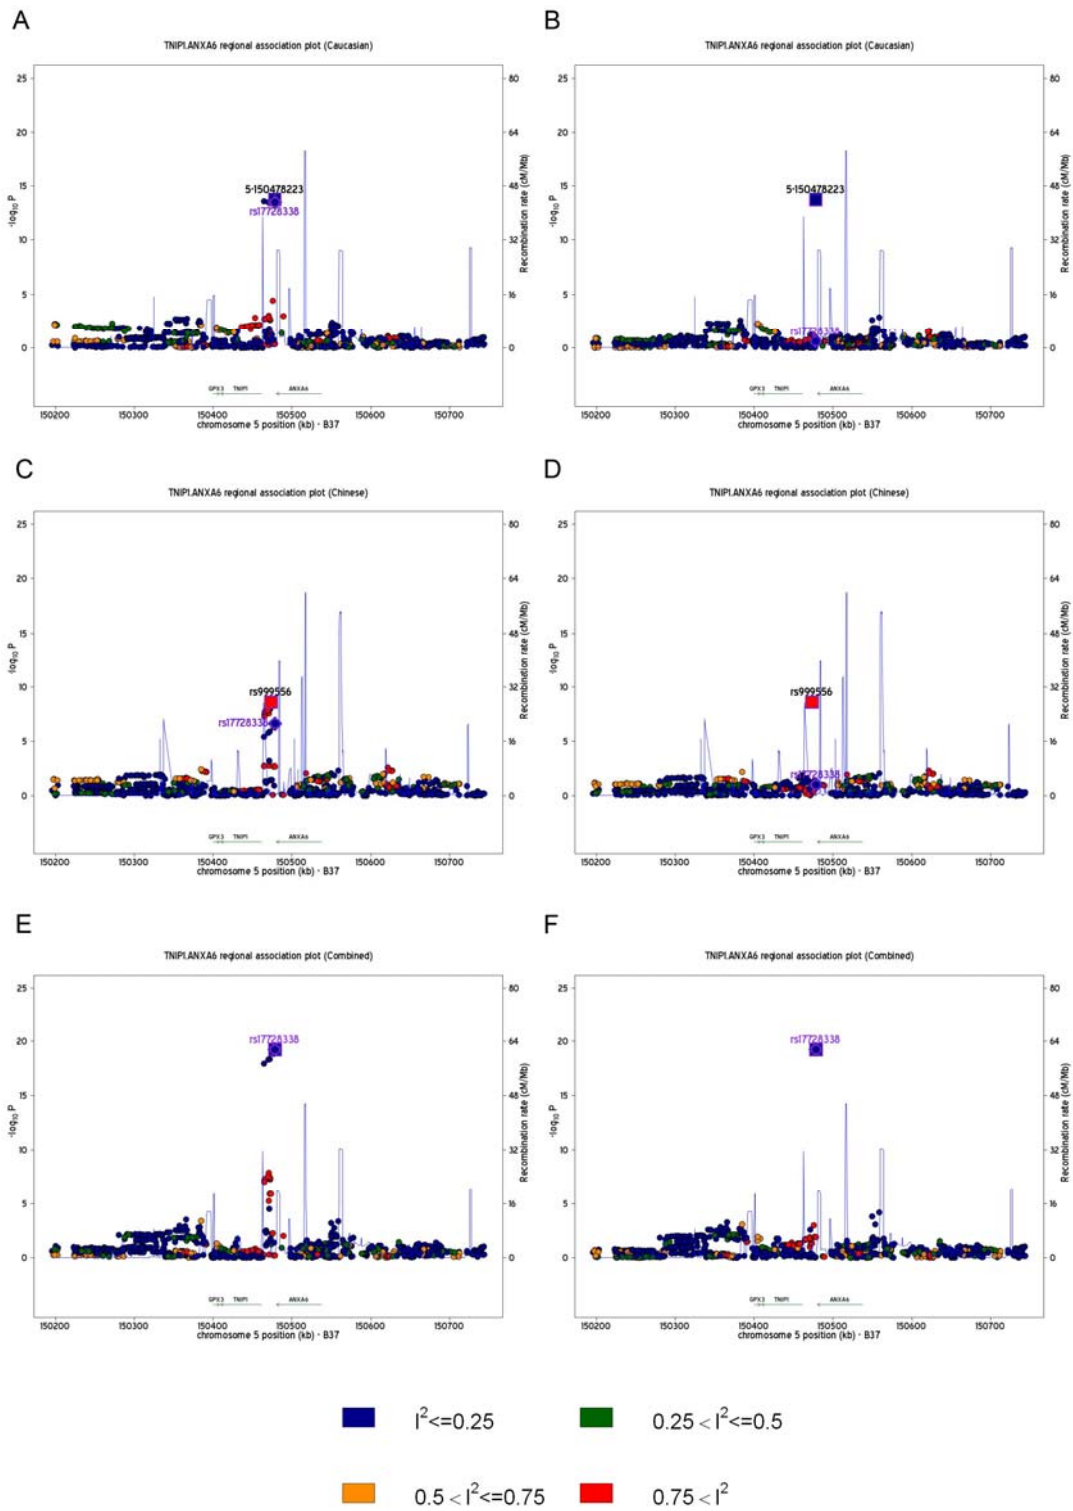

**ab. TNIP1.ANXA6**

A

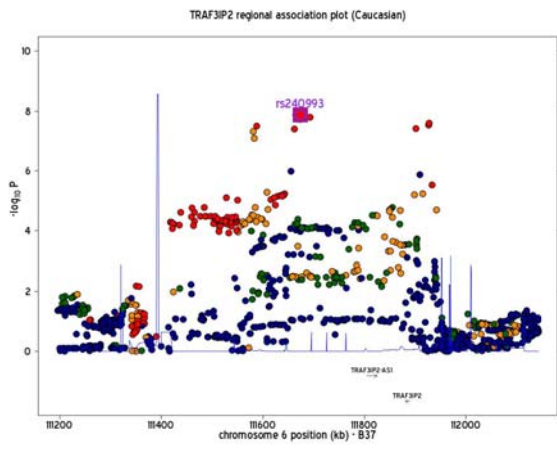

B

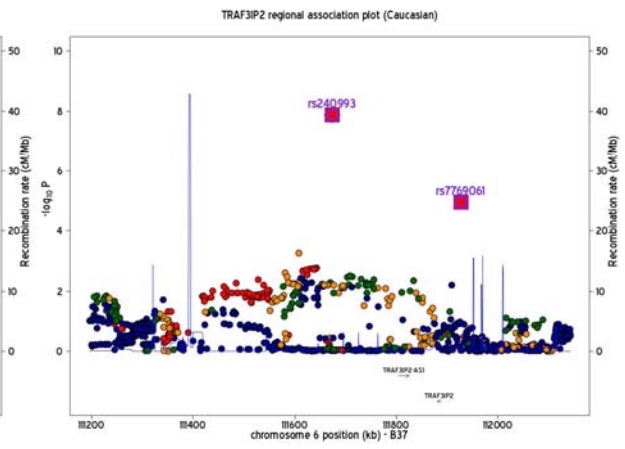

C

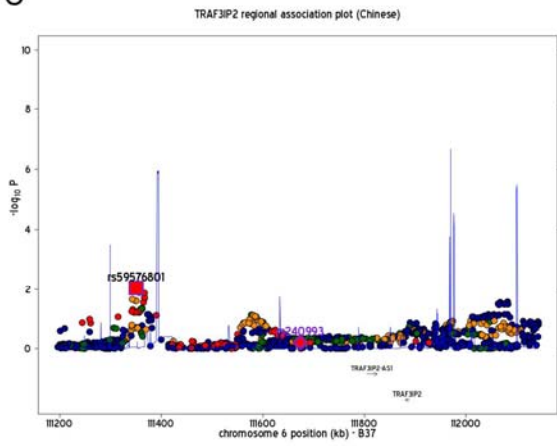

D

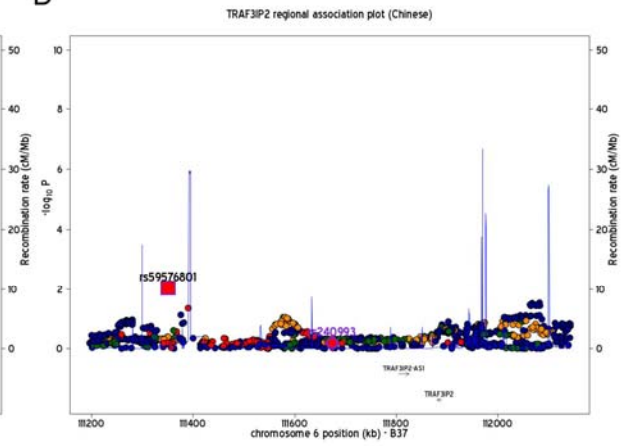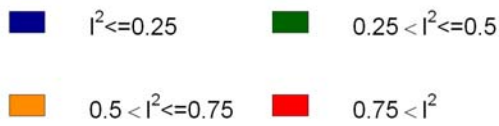

ac. TRAF3IP2

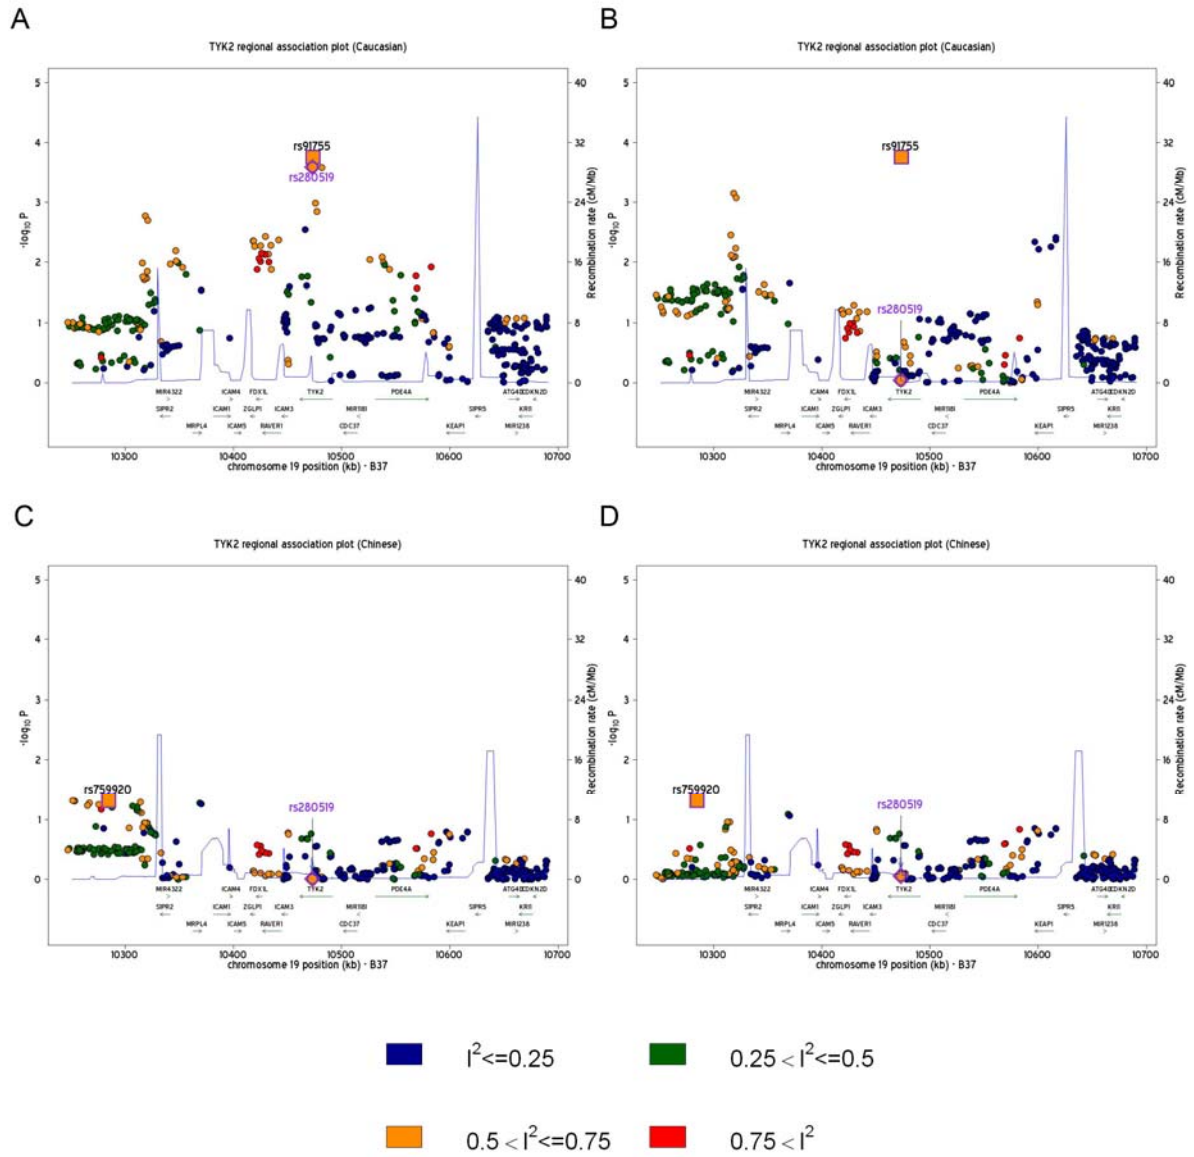

ad.TYK2

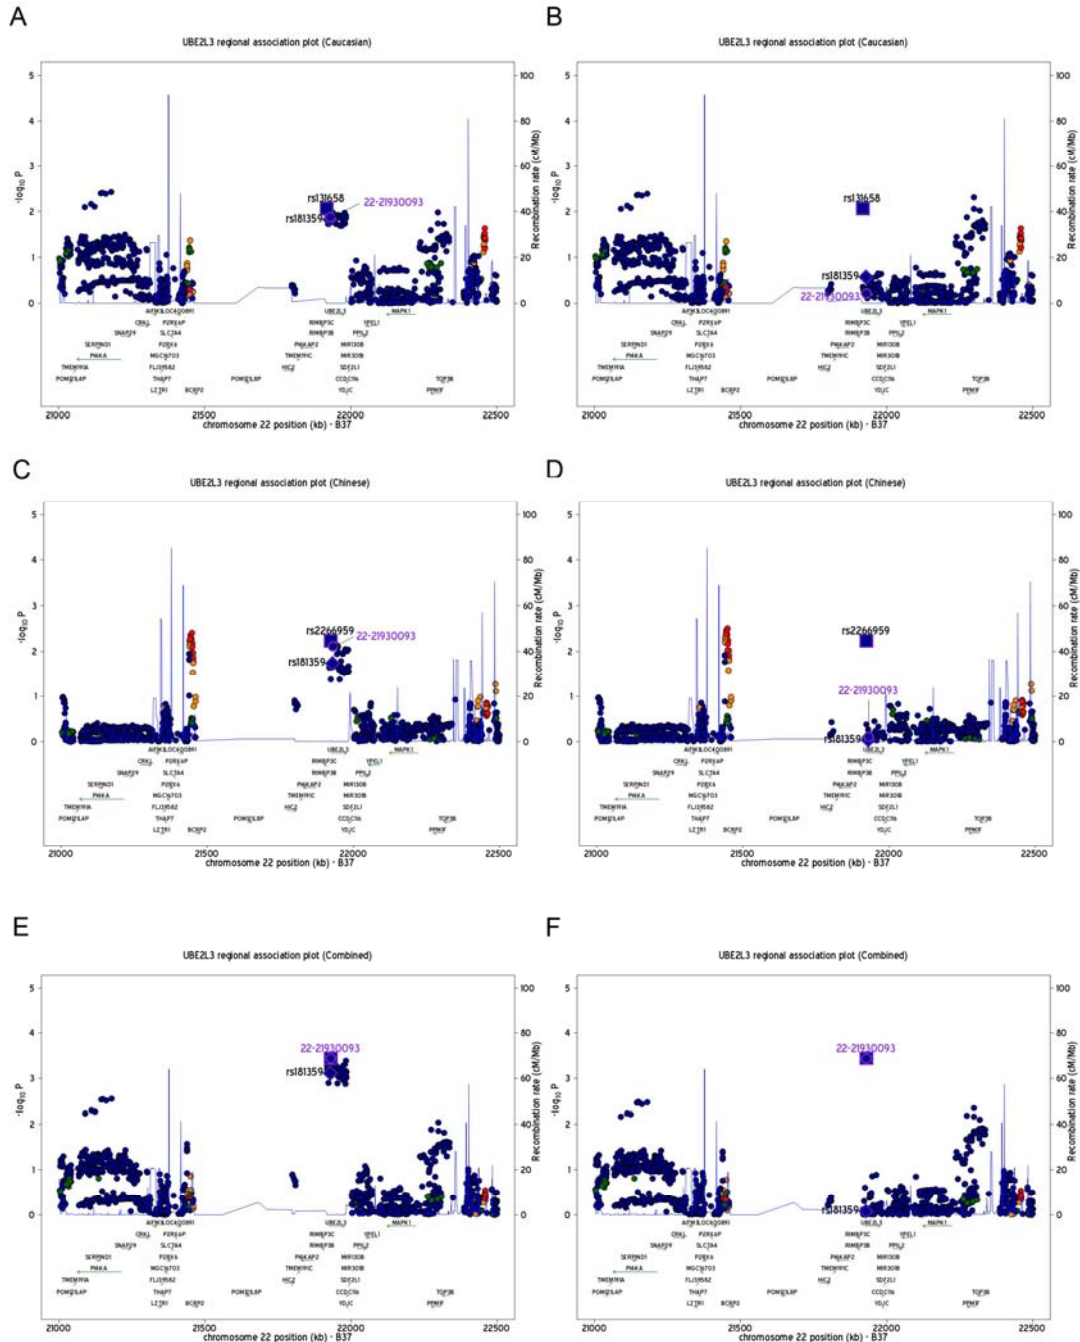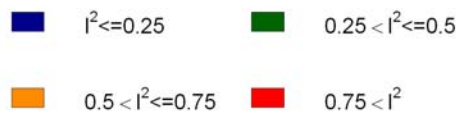

ae. UBE2L3

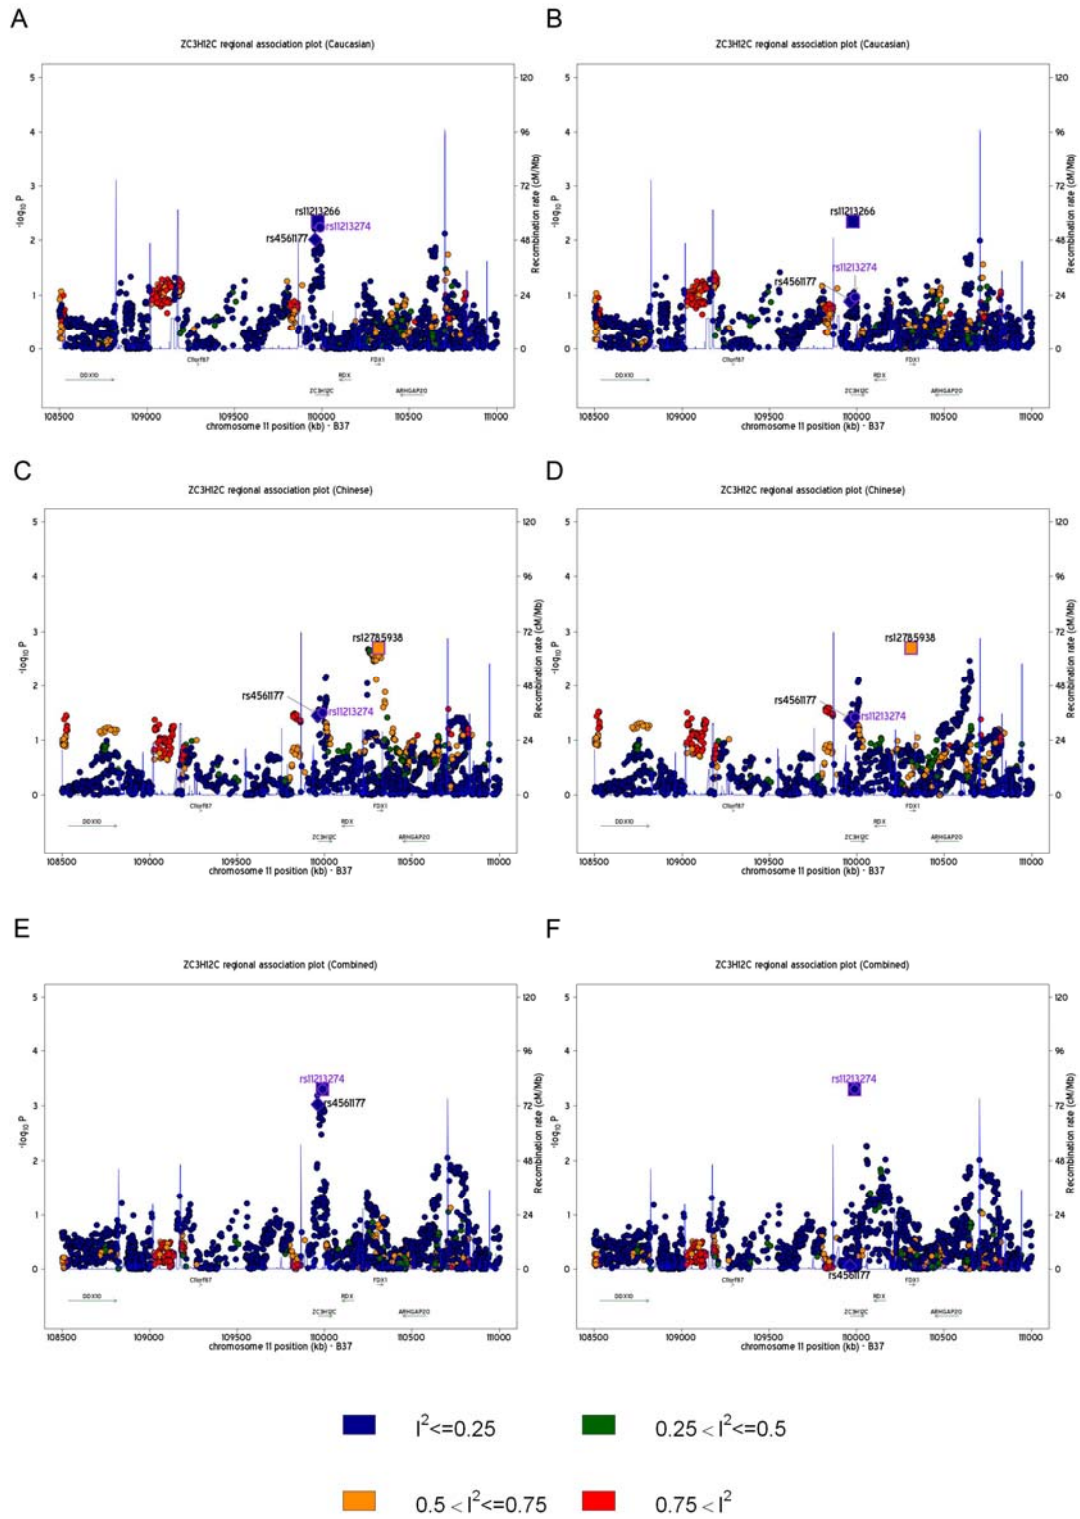

af. ZC3H12C

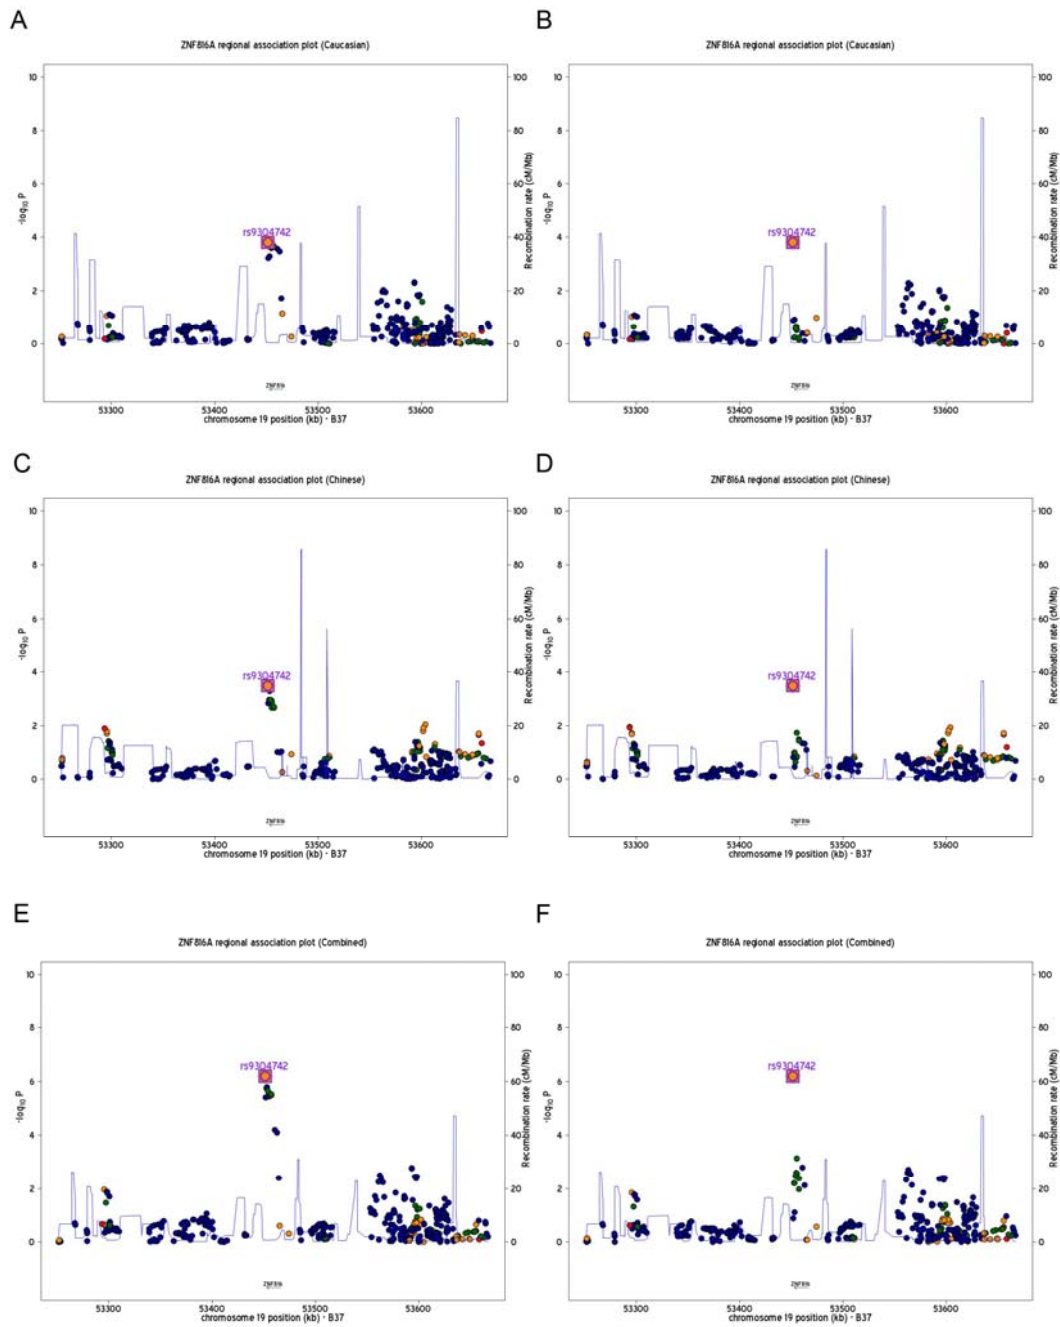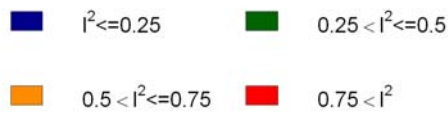

ag. ZNF816A

**Supplementary Figure 4: Regional association plot of 33 psoriasis risk loci.** The relative location of annotated genes and the direction of transcription are shown in the lower portion of the figure, and the chromosomal position is shown on the  $x$  axis. The blue line shows the recombination rate (estimated from HapMap data of CEU, CHB+JPT and Combined population) across the region (right  $y$  axis), and the left  $y$  axis shows the significance of the associations. The  $\log_{10} P$  values from the log-additive genetic model for all SNPs in the region from the population meta analysis, trans-ethnic meta analysis or the conditional analysis. A, C and E are unconditional association results of Caucasian, Chinese and combined GWAS meta-analysis respectively. B, D, F are conditional association results of Caucasian, Chinese and combined GWAS meta-analysis respectively. The purple diamond indicates the  $P$  value for the reported SNP; the purple square indicates the condition SNPs (these are the top or secondary SNPs), their unconditional  $P$  values are shown; the purple circle labeled with rs IDs in purple font are psoriasis susceptibility SNPs with statistics presented in the tables, they are in the same LD block with reported or condition SNPs which are in black font rs IDs; grey font rs IDs are secondary SNPs which were not validated in our studies. All circles, squares and diamonds are color filled according to the level of heterogeneity among the 2 populations (such as  $I^2$ ).







**Supplementary Figure 5: Regional association plot of *HLA* region.** The relative location of annotated genes and the direction of transcription are shown in the lower portion of the figure, and the chromosomal position is shown on the *x* axis. The green line shows the recombination rate (estimated from HapMap data of CEU, CHB+JPT and Combined population) across the region (right *y* axis), and the left *y* axis shows the significance of the associations. The log<sub>10</sub> *P* values from the log-additive genetic model for all SNPs in the region from the population meta analysis or the conditional analysis. The horizontal red line indicates the genome-wide association significance criteria ( $P=5 \times 10^{-8}$ ), a Bonferroni corrected type I error rate based on the analysis in the whole genome common markers. A is unconditional association results of Caucasian, Chinese respectively. B, C, D, E are conditional association results of Caucasian, Chinese respectively. The Yellow diamond indicates the *P* value for the reported classical alleles; The blue circle indicates the reported SNPs in the paper; rs IDs in black or purple font are psoriasis susceptibility SNPs with statistics presented in the tables. (a) In the Caucasian GWAS cohort. (b) In the Chinese GWAS cohort.



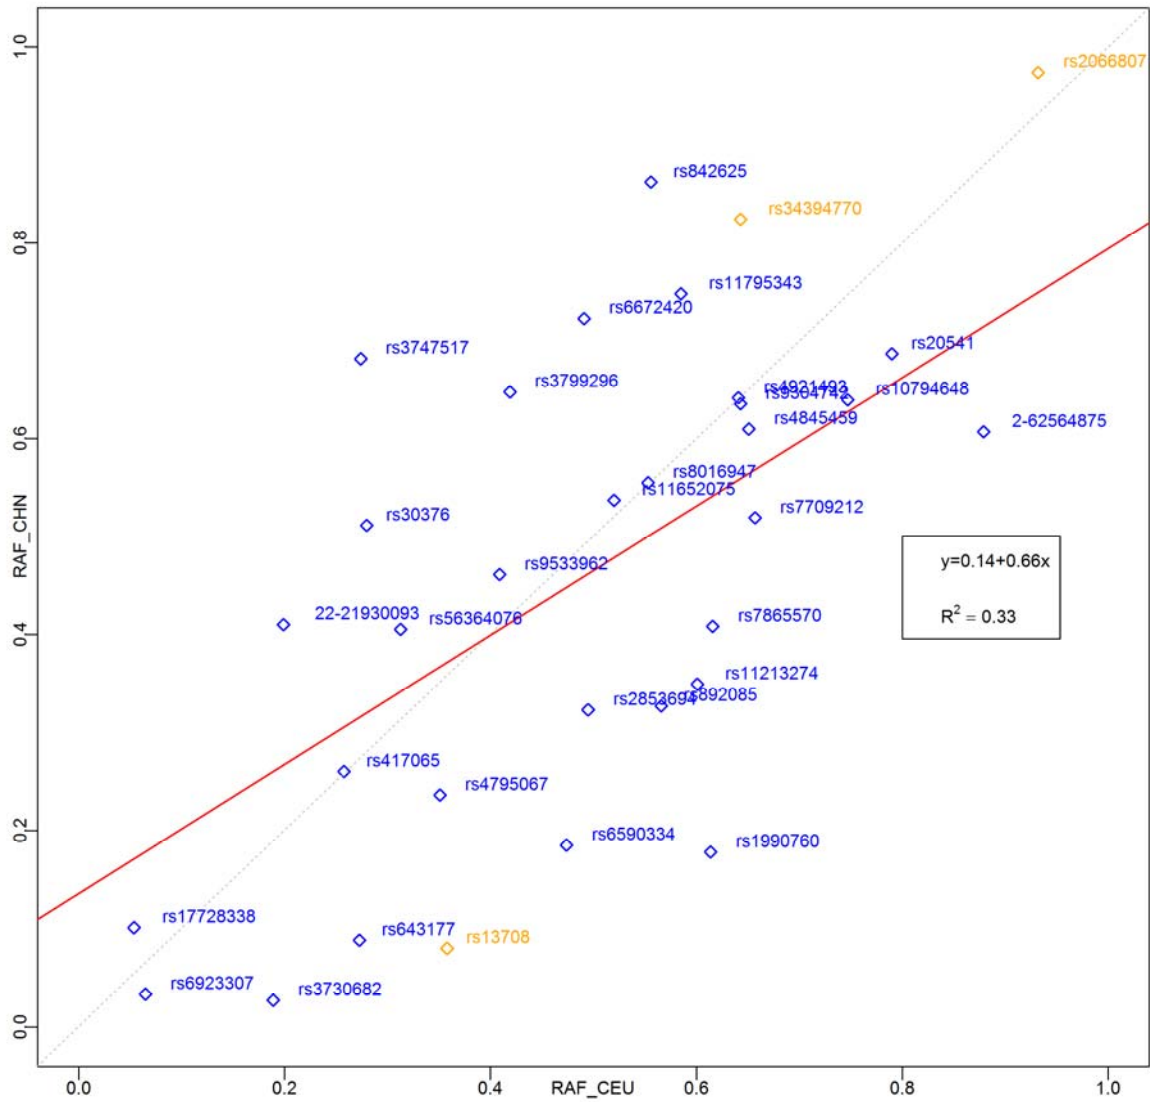

**Supplementary Figure 7: The correlation of risk allele frequencies of 33 SNPs in 30 shared loci and between European and Chinese populations in this study.** The three SNPs (rs13708, rs34394770 and rs2066807) with significant allele frequency heterogeneity were labelled in orange. The 30 SNPs in 27 shared loci were labelled in blue. The risk allele frequencies of 30 SNPs in 27 shared loci between two ancestries were significantly correlated ( $y = 0.14 + 0.66x$ ,  $R^2 = 0.33$ ,  $P = 0.0005$ ),  $P$ -value from linear regression of risk alleles frequencies between in European and in Chinese populations.

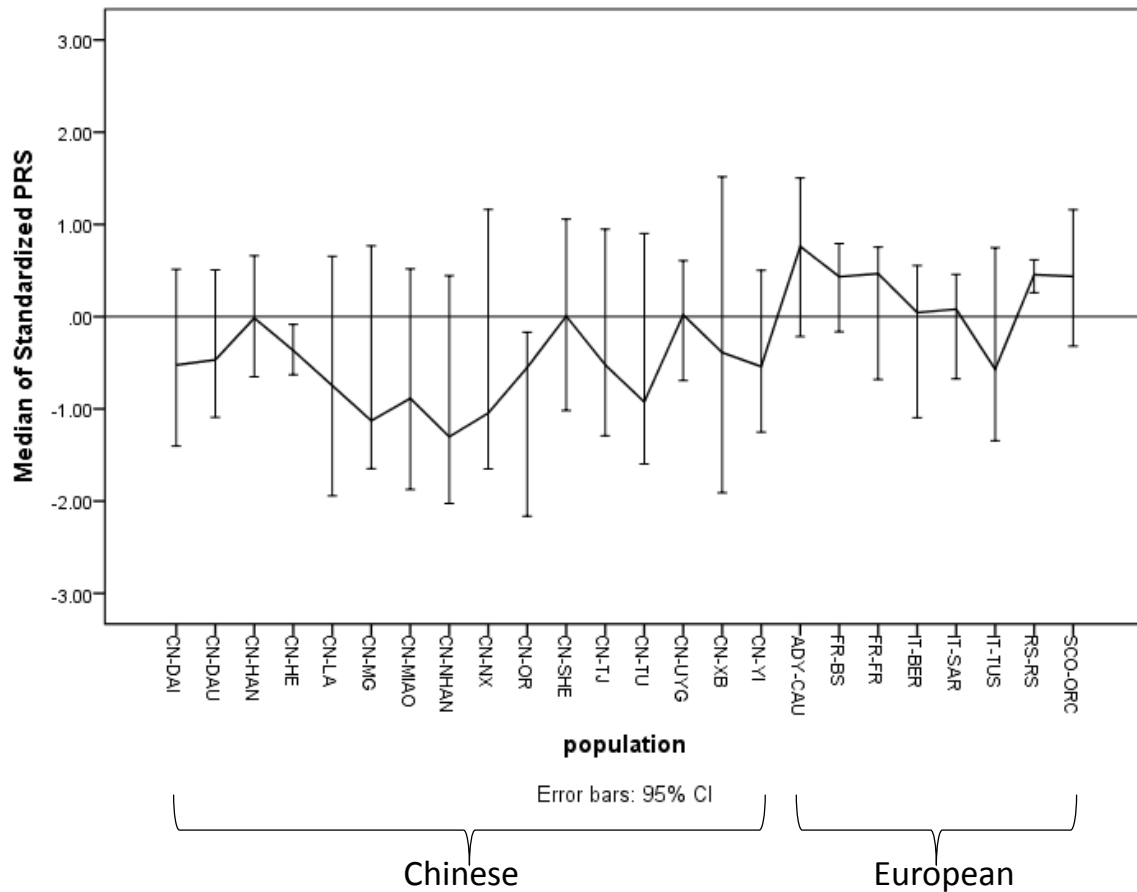

**Supplementary Figure 8: The distribution of median of standardized polygenic risk score (PRS) among Chinese and European in HGDP.** The polygenic risk score (PRS) was calculated as described (Online Method). The *x*-axis indicates the populations. The *y*-axis indicates the median value of standardized PRS. The horizontal line indicates that the median value of standardized PRS is zero. The error bars show the 95% confidential interval. All median value of standardized PRS are connected by a line. Standardized genetic risk score is quite different among 52 HGDP populations with *P* of 1.15E-09 from Kruskal-Wallis test (non-parametric test). And the risk score is negatively correlated with longitude (*P*=3.23E-07), however not related to latitude of populations (*P*=0.053) from the spearman's rank correlation test. The Figure shows that the risk score is lower in Chinese than in European.

**Supplementary Table 1: Power calculation in Chinese sample.** The statistical power was as a function of disease allele frequency and genotype relation risk for the actual Chinese sample size used in our study. The power was calculated by QUANTO.

| Disease Allele Frequency | Genotype Relation Risks(Log-Additive Model) |        |        |        |        |        |        |
|--------------------------|---------------------------------------------|--------|--------|--------|--------|--------|--------|
|                          | 1.10                                        | 1.15   | 1.20   | 1.25   | 1.30   | 1.35   | 1.40   |
| 0.10                     | 0.18%                                       | 4.53%  | 30.62% | 74.19% | 96.21% | 99.80% | 99.99% |
| 0.20                     | 1.87%                                       | 31.65% | 85.90% | 99.51% | 99.99% | 99.99% | 99.99% |
| 0.30                     | 5.37%                                       | 58.10% | 97.46% | 99.99% | 99.99% | 99.99% | 99.99% |
| 0.40                     | 8.61%                                       | 70.90% | 99.15% | 99.99% | 99.99% | 99.99% | 99.99% |
| 0.50                     | 9.66%                                       | 73.57% | 99.33% | 99.99% | 99.99% | 99.99% | 99.99% |

**Supplementary Table 2: The functional annotation of novel SNPs in ENCODE through HaploReg v2**

| SNP        | chr | POS       | r <sup>2</sup> | D'   | Proxy SNPs  | Ref  | Alt | Enhancer histone marks | DNase             | Proteins bound |
|------------|-----|-----------|----------------|------|-------------|------|-----|------------------------|-------------------|----------------|
| rs28512356 | 3   | 189615475 | 1              | 1    | rs28512356  | C    | A   | NHEK, HMEC             | SAEC              | GR,NRSF,POL2 B |
| rs28512356 | 3   | 189617088 | 0.98           | 1    | rs71298526  | GA   | G   | NHEK, HMEC             | NHEK,HEEpi C,SAEC |                |
| rs28512356 | 3   | 189617276 | 1              | 1    | rs28688563  | G    | T   | NHEK, HMEC             |                   |                |
| rs28512356 | 3   | 189623672 | 1              | 1    | rs13081982  | A    | T   |                        |                   |                |
| rs28512356 | 3   | 189627940 | 0.98           | 0.99 | rs36006475  | TA   | T   | NHEK, HMEC, Huvec      |                   |                |
| rs28512356 | 3   | 189637419 | 0.98           | 0.99 | rs12485364  | A    | G   |                        |                   |                |
| rs28512356 | 3   | 189638198 | 0.83           | 0.99 | rs13065424  | G    | A   |                        |                   |                |
| rs28512356 | 3   | 189638887 | 0.94           | 0.98 | rs35822139  | C    | A   |                        |                   |                |
| rs34394770 | 13  | 40299842  | 0.95           | 0.99 | rs35623045  | ATAG | A   |                        |                   |                |
| rs34394770 | 13  | 40300328  | 0.89           | 0.99 | rs9603603   | T    | G   |                        |                   |                |
| rs34394770 | 13  | 40308307  | 0.97           | 0.99 | rs9603605   | T    | C   |                        |                   |                |
| rs34394770 | 13  | 40318819  | 0.99           | 1    | rs9603608   | A    | C   |                        |                   |                |
| rs34394770 | 13  | 40319225  | 0.86           | 0.99 | rs144565908 | T    | A   |                        |                   |                |
| rs34394770 | 13  | 40319954  | 0.99           | 1    | rs28635831  | A    | G   |                        |                   |                |
| rs34394770 | 13  | 40326282  | 0.98           | 1    | rs9943      | A    | G   |                        |                   |                |
| rs34394770 | 13  | 40333369  | 1              | 1    | rs34394770  | T    | C   |                        |                   |                |
| rs34394770 | 13  | 40334852  | 0.99           | 1    | rs9603612   | C    | G   |                        | GM18507,GM19238   | EBF1           |
| rs34394770 | 13  | 40336770  | 0.98           | 1    | rs60120504  | AC   | A   |                        |                   |                |
| rs34394770 | 13  | 40342557  | 0.99           | 1    | rs12875311  | G    | A   | H1                     | H1-hESC,H7-hESC   |                |
| rs34394770 | 13  | 40345356  | 0.99           | 1    | rs7319041   | G    | A   |                        |                   |                |
| rs34394770 | 13  | 40345466  | 0.98           | 0.99 | rs7320598   | C    | T   |                        |                   |                |
| rs34394770 | 13  | 40350912  | 0.99           | 0.99 | rs7993214   | T    | C   | 5 cell types           | 56 cell types     | NFKB,CFOS,P300 |
| rs34394770 | 13  | 40351064  | 0.91           | 0.99 | rs7986796   | G    | T   | 5 cell types           | HRGEC             |                |
| rs34394770 | 13  | 40351094  | 0.99           | 0.99 | rs12876235  | T    | G   | 5 cell types           | HRGEC             |                |
| rs34394770 | 13  | 40351341  | 0.99           | 0.99 | rs9532430   | A    | G   | 6 cell types           | HAEPiC            | MAFK           |
| rs34394770 | 13  | 40352671  | 0.99           | 0.99 | rs9532433   | C    | A   | Huvec                  |                   |                |
| rs34394770 | 13  | 40353230  | 0.99           | 0.99 | rs9548932   | G    | T   | Huvec, GM12878         |                   |                |



|            |    |           |      |      |             |        |   |                     |               |                   |
|------------|----|-----------|------|------|-------------|--------|---|---------------------|---------------|-------------------|
| rs34394770 | 13 | 40354200  | 0.99 | 0.99 | rs12872801  | C      | T | HSMM, Huvec         | 15 cell types |                   |
| rs34394770 | 13 | 40355913  | 0.99 | 0.99 | rs9532434   | T      | C |                     |               |                   |
| rs34394770 | 13 | 40362229  | 0.97 | 0.99 | rs8002731   | A      | C | HSMM, Huvec, H1     |               | MAX               |
| rs34394770 | 13 | 40368069  | 0.89 | 0.96 | rs9603616   | C      | T |                     |               |                   |
| rs34394770 | 13 | 40368444  | 0.87 | 0.95 | rs11618582  | A      | G |                     |               |                   |
| rs34394770 | 13 | 40368601  | 0.89 | 0.96 | rs9594366   | C      | T |                     |               |                   |
| rs9533962  | 13 | 45321621  | 0.92 | 0.97 | rs7982911   | G      | A | HMEC, NHEK          | AG09309       |                   |
| rs9533962  | 13 | 45334194  | 1    | 1    | rs9533962   | C      | T | 6 cell types        | 15 cell types | FOXA1             |
| rs9533962  | 13 | 45342453  | 0.94 | 0.98 | rs1415641   | C      | T | 4 cell types        |               | NFKB              |
| rs9533962  | 13 | 45342796  | 0.95 | 0.98 | rs1415640   | G      | A | 4 cell types        |               |                   |
| rs9533962  | 13 | 45343590  | 0.95 | 0.98 | rs9526002   | A      | G | HMEC, NHEK, GM12878 | 26 cell types | 5 bound proteins  |
| rs9533962  | 13 | 45355541  | 0.85 | 0.98 | rs9533966   | A      | G |                     | Fibrobl       |                   |
| rs2853694  | 21 | 36470865  | 1    | 1    | rs8128234   | C      | T | K562                |               |                   |
| rs2853694  | 2  | 163128824 | 1    | 1    | rs3747517   | T      | C |                     |               |                   |
| rs2853694  | 5  | 158730368 | 1    | 1    | rs4921464   | A      | G |                     |               | SETDB1            |
| rs2853694  | 5  | 158731548 | 1    | 1    | rs1549922   | G      | A |                     |               |                   |
| rs2853694  | 5  | 158733619 | 0.94 | 1    | rs4921213   | G      | A |                     |               |                   |
| rs2853694  | 5  | 158734517 | 1    | 1    | rs11135058  | T      | C |                     | HeLa-S3       |                   |
| rs2853694  | 5  | 158749088 | 1    | 1    | rs2853694   | G      | T |                     |               |                   |
| rs4921493  | 5  | 158833535 | 0.93 | 0.98 | rs12374547  | G      | A | GM12878             |               |                   |
| rs4921493  | 5  | 158834367 | 0.93 | 0.98 | rs60689680  | G      | T |                     |               |                   |
| rs4921493  | 5  | 158835178 | 0.87 | 0.99 | rs200786876 | TTTTTC | T |                     |               |                   |
| rs4921493  | 5  | 158835179 | 0.92 | 0.99 | rs10556150  | TTTTC  | T |                     |               |                   |
| rs4921493  | 5  | 158836107 | 1    | 1    | rs4921493   | T      | C |                     |               |                   |
| rs4921493  | 5  | 158836126 | 0.94 | 0.99 | rs4921494   | G      | A |                     |               |                   |
| rs4921493  | 5  | 158836581 | 0.94 | 1    | rs12655757  | C      | T | GM12878             |               |                   |
| rs4921493  | 5  | 158839217 | 0.98 | 1    | rs1422878   | C      | T | GM12878             |               |                   |
| rs4921493  | 5  | 158839512 | 0.99 | 1    | rs1422877   | A      | G | H1, GM12878         | 21 cell types | NFKB,CEBPB,S TAT3 |
| rs4921493  | 5  | 158839745 | 0.99 | 1    | rs12651787  | T      | C | GM12878, H1         |               | EBF1              |
| rs4921493  | 5  | 158841470 | 0.96 | 0.99 | rs10476296  | C      | T | GM12878             | GM06990       |                   |
| rs4921493  | 5  | 158843235 | 0.89 | 0.96 | rs6863015   | C      | A |                     |               |                   |
| rs4921493  | 5  | 158843253 | 0.86 | 0.96 | rs6888061   | T      | C |                     |               |                   |
| rs4921493  | 5  | 158844232 | 0.92 | 0.97 | rs58368531  | G      | A | K562                |               |                   |
| rs4921493  | 5  | 158846606 | 0.87 | 0.96 | rs72802188  | C      | T |                     |               | CTCF              |
| rs4921493  | 5  | 158848253 | 0.87 | 0.96 | rs4921497   | C      | G |                     |               |                   |
| rs4921493  | 5  | 158848433 | 0.86 | 0.95 | rs4921498   | G      | A |                     |               |                   |
| rs4921493  | 5  | 158849200 | 0.86 | 0.95 | rs11743870  | G      | A |                     |               |                   |

|           |   |           |      |      |            |   |   |              |                         |      |
|-----------|---|-----------|------|------|------------|---|---|--------------|-------------------------|------|
| rs4921493 | 5 | 158849636 | 0.86 | 0.95 | rs10155584 | G | A | 5 cell types |                         |      |
| rs4921493 | 5 | 158849837 | 0.86 | 0.95 | rs4921227  | A | G |              |                         |      |
| rs4921493 | 5 | 158852944 | 0.85 | 0.95 | rs7714401  | T | A | GM12878      | FibroP                  | EBF1 |
| rs4921493 | 5 | 158853941 | 0.85 | 0.95 | rs2012830  | A | T | GM12878      | GM12878,GM12864,GM12865 | BATF |
| rs4921493 | 5 | 158856506 | 0.83 | 0.93 | rs4921501  | C | A |              |                         |      |
| rs4921493 | 5 | 158856513 | 0.83 | 0.94 | rs4921228  | C | A |              |                         |      |

SNP: the reported novel SNP in our study; chr.: chromosome; Pos: physical position in HG19. r2 and D' indicate the linkage status between SNP and proxy SNPs.

**Supplementary Table 3: The known eQTL effect at the four novel loci**

| <b>GWAS SNP</b> | <b>Linked SNP</b> | <b>r<sup>2</sup></b> | <b>D'</b> | <b>Tissue</b>    | <b>P-value</b> | <b>Gene</b> |
|-----------------|-------------------|----------------------|-----------|------------------|----------------|-------------|
| rs34394770      | rs4514547         | 0.7                  | 0.88      | Monocytes        | 9.50E-07       | COG6        |
| rs34394770      | s9943             | 0.934                | 1         | Monocytes        | 3.61E-05       | COG6        |
| rs34394770      | rs12875311        | 0.934                | 1         | Monocytes        | 3.36E-05       | COG6        |
| rs34394770      | rs7993214         | 0.975                | 1         | peripheral blood | 7.11E-06       | KIF18A      |

GWAS SNP: the novel reported SNPs in our study; Linked SNP: the SNPs with high linkage disequilibrium with reported SNPs. r<sup>2</sup> and D' indicate the linkage pair-wise status. P-value indicates the association between the SNP and the respective gene transcript.

**Supplementary Table 4a: Conditional association results of *IL12B* gene region**

| Analysis                                         | rsid      | Chr | BP.B37    | RA | RAF   |       | Caucasian GWAS |                 | Chinese GWAS |                 | Combined All |                 |                |
|--------------------------------------------------|-----------|-----|-----------|----|-------|-------|----------------|-----------------|--------------|-----------------|--------------|-----------------|----------------|
|                                                  |           |     |           |    | EUR   | CHN   | P              | OR (95% CI)     | P            | OR (95% CI)     | P            | OR (95% CI)     | p <sub>0</sub> |
| <b>Unconditional</b>                             | rs7709212 | 5   | 158764177 | T  | 0.657 | 0.519 | 2.83E-20       | 1.37(1.31-1.44) | 1.03E-11     | 1.4(1.31-1.5)   | 1.20E-30     | 1.38(1.33-1.44) | 7.03E-01       |
|                                                  | rs4921493 | 5   | 158836107 | T  | 0.641 | 0.642 | 3.89E-13       | 1.28(1.21-1.34) | 6.89E-05     | 1.24(1.13-1.34) | 2.22E-16     | 1.27(1.21-1.32) | 6.27E-01       |
|                                                  | rs2853694 | 5   | 158749088 | G  | 0.495 | 0.323 | 2.98E-22       | 1.36(1.3-1.42)  | 2.12E-09     | 1.37(1.27-1.48) | 8.61E-30     | 1.36(1.31-1.42) | 8.87E-01       |
| <b>Conditioning on rs7709212</b>                 | rs4921493 | 5   | 158836107 | T  | 0.641 | 0.642 | 2.70E-11       | 1.26(1.19-1.32) | 4.66E-03     | 1.17(1.06-1.28) | 6.80E-13     | 1.23(1.17-1.29) | 2.78E-01       |
|                                                  | rs2853694 | 5   | 158749088 | G  | 0.495 | 0.323 | 7.74E-08       | 1.23(1.16-1.31) | 4.48E-03     | 1.19(1.07-1.31) | 1.22E-09     | 1.22(1.16-1.28) | 5.87E-01       |
| <b>Conditioning on rs7709212 &amp; rs4921493</b> | rs2853694 | 5   | 158749088 | G  | 0.495 | 0.323 | 1.91E-08       | 1.25(1.17-1.32) | 5.24E-03     | 1.18(1.07-1.3)  | 3.79E-10     | 1.23(1.16-1.29) | 4.76E-01       |
| <b>Multivariate analysis</b>                     | rs7709212 | 5   | 158764177 | T  | 0.657 | 0.519 | 5.92E-05       | 1.19(1.09-1.29) | 8.04E-05     | 1.26(1.12-1.42) | 3.35E-08     | 1.21(1.13-1.3)  | 5.38E-01       |
|                                                  | rs4921493 | 5   | 158836107 | T  | 0.641 | 0.642 | 8.14E-12       | 1.26(1.18-1.35) | 6.19E-03     | 1.16(1.04-1.3)  | 3.52E-13     | 1.23(1.17-1.31) | 3.92E-01       |
|                                                  | rs2853694 | 5   | 158749088 | G  | 0.495 | 0.323 | 1.93E-08       | 1.25(1.15-1.34) | 3.82E-03     | 1.19(1.06-1.34) | 4.24E-10     | 1.23(1.15-1.31) | 2.12E-01       |

Chr: chromosome; BP.B37: position based on NCBI build 37; RA: risk/non-risk alleles; RAF: risk allele's frequencies; EUR: European samples; CHN: Chinese samples; P: association P values in the meta, trans ethnic meta analysis or the conditional study (alleles dosages in GWAS studies); OR: odds ratio; 95% CI: 95% confidence interval; p<sub>0</sub>: heterogeneity P values.

There were three independent loci identified: rs7709212, rs4921493, rs2853694.

**Supplementary Table 4b: The pairwise linkage disequilibrium among the three SNPs in *IL12B* locus**

| SNP       | rs4921493             |                       | rs2853694             |                       |
|-----------|-----------------------|-----------------------|-----------------------|-----------------------|
|           | CEU                   | JPT+CHB               | CEU                   | JPT+CHB               |
| rs7709212 | $r^2=0.019, D'=0.206$ | $r^2=0.033, D'=0.209$ | $r^2=0.499, D'=0.854$ | $r^2=0.269, D'=0.892$ |
| rs2853694 | $r^2=0.024, D'=0.19$  | $r^2=0.008, D'=0.103$ | /                     | /                     |

\* The Linkage disequilibrium was calculated based on the samples from CEU population and JPT, CHB populations in HapMap.

**Supplementary Table 4c: Haplotypic association for markers in *IL12B* locus with the risk of psoriasis**

| Haplotype | rs2853694 | rs7709212 | rs4921493 | European GWAS |           |                 |          | Chinese GWAS |           |                 |          | Combined       |          |                |
|-----------|-----------|-----------|-----------|---------------|-----------|-----------------|----------|--------------|-----------|-----------------|----------|----------------|----------|----------------|
|           |           |           |           | Freq_ctrl     | Freq_case | OR (95% CI)     | P        | Freq_ctrl    | Freq_case | OR (95% CI)     | P        | OR (95% CI)    | P        | p <sub>Q</sub> |
| 1         | T         | T         | T         | 15.44%        | 15.37%    | -               | -        | 16.51%       | 20.16%    | -               | -        | -              | -        | -              |
| 2         | G         | C         | C         | 1.69%         | 1.33%     | 0.83(0.63-1.08) | 1.72E-01 | 0.58%        | 0.81%     | 1.56(0.88-2.76) | 1.28E-01 | 0.93(0.73-1.2) | 5.54E-01 | 5.02E-02       |
| 3         | G         | C         | T         | 0.92%         | 1.10%     | 1.15(0.84-1.57) | 3.91E-01 | 1.79%        | 1.58%     | 0.82(0.55-1.22) | 3.22E-01 | 1.01(0.79-1.3) | 9.47E-01 | 1.91E-01       |
| 4         | G         | T         | C         | 14.36%        | 14.76%    | 1.05(0.94-1.17) | 4.08E-01 | 4.58%        | 4.72%     | 0.88(0.68-1.14) | 3.30E-01 | 1.02(0.92-1.1) | 7.14E-01 | 2.21E-01       |
| 5         | G         | T         | T         | 32.66%        | 39.80%    | 1.23(1.12-1.35) | 2.04E-05 | 25.21%       | 32.49%    | 1.17(1.01-1.36) | 3.13E-02 | 1.21(1.12-1.3) | 2.07E-06 | 6.08E-01       |
| 6         | T         | C         | C         | 16.10%        | 11.71%    | 0.73(0.65-0.81) | 5.64E-08 | 24.00%       | 18.35%    | 0.7(0.6-0.82)   | 1.19E-05 | 0.72(0.65-0.8) | 3.21E-12 | 7.39E-01       |
| 7         | T         | C         | T         | 16.01%        | 14.00%    | 0.88(0.78-0.98) | 2.28E-02 | 21.76%       | 18.18%    | 0.78(0.67-0.92) | 2.85E-03 | 0.85(0.77-0.9) | 3.40E-04 | 2.64E-01       |
| 8         | T         | T         | C         | 2.83%         | 1.92%     | 0.68(0.55-0.85) | 7.08E-04 | 5.57%        | 6.30%     | 0.92(0.73-1.17) | 5.03E-01 | 0.79(0.67-0.9) | 3.56E-03 | 6.43E-02       |

Haplotype 1 was set as reference. Freq\_ctrl/Freq\_cases : the haplotype frequency in controls/cases; P: the association P values for each haplotype in the specified population ; OR: odds ratio; 95% CI: 95% confidence interval; P<sub>Q</sub>: heterogeneity P values.

**Supplementary Table 5a: Conditional association results of *IFIH1* gene region**

| Analysis                         | rsid       | Chr | BP.B37    | RA | ARF   |       | Combined European |                 | Combined Chinese |                 | Combined All |                 |                |
|----------------------------------|------------|-----|-----------|----|-------|-------|-------------------|-----------------|------------------|-----------------|--------------|-----------------|----------------|
|                                  |            |     |           |    | EUR   | CHN   | P                 | OR (95% CI)     | P                | OR (95% CI)     | P            | OR (95% CI)     | p <sub>Q</sub> |
| <b>Unconditional</b>             | rs1990760  | 2   | 163124051 | T  | 0.614 | 0.188 | 3.21E-13          | 1.2(1.14-1.26)  | 6.33E-01         | 1.02(0.95-1.08) | 1.92E-09     | 1.12(1.08-1.17) | 3.29E-05       |
|                                  | rs3747517  | 2   | 163128824 | C  | 0.726 | 0.311 | 1.53E-01          | 1.04(0.99-1.1)  | 2.96E-04         | 0.91(0.86-0.96) | 1.12E-01     | 0.97(0.94-1.01) | 3.81E-04       |
|                                  | rs2111485  | 2   | 163110536 | G  | 0.611 | 0.174 | 1.02E-07          | 1.19(1.12-1.27) | 1.59E-01         | 1.1(0.96-1.25)  | 7.20E-08     | 1.17(1.11-1.24) | 2.52E-01       |
|                                  | rs17716942 | 2   | 163260691 | T  | 0.868 | NA    | 7.80E-04          | 1.18(1.07-1.3)  | NA               | NA              | 7.80E-04     | 1.18(1.07-1.3)  | 1.00E+00       |
| <b>Conditioning on rs1990760</b> | rs3747517  | 2   | 163128824 | C  | 0.726 | 0.311 | 2.87E-11          | 0.75(0.69-0.81) | 5.16E-09         | 0.8(0.74-0.86)  | 1.52E-18     | 0.77(0.73-0.82) | 3.26E-01       |
|                                  | rs2111485  | 2   | 163110536 | G  | 0.611 | 0.174 | 5.09E-01          | 1.09(0.84-1.42) | 2.12E-01         | 0.81(0.57-1.13) | 8.08E-01     | 0.97(0.79-1.2)  | 1.65E-01       |
|                                  | rs17716942 | 2   | 163260691 | T  | 0.868 | NA    | 1.62E-01          | 1.08(0.97-1.2)  | NA               | NA              | 1.62E-01     | 1.08(0.97-1.2)  | 1.00E+00       |
| <b>Multivariate analysis</b>     | rs1990760  | 2   | 163124051 | T  | 0.614 | 0.188 | 9.45E-23          | 1.48(1.37-1.6)  | 2.85E-06         | 1.24(1.13-1.35) | 1.39E-25     | 1.37(1.29-1.45) | 1.99E-02       |
|                                  | rs3747517  | 2   | 163128824 | C  | 0.726 | 0.311 | 2.69E-11          | 0.75(0.69-0.81) | 4.23E-09         | 0.80(0.74-0.86) | 1.17E-18     | 0.77(0.73-0.82) | 6.52E-01       |

Chr: chromosome; BP.B37: position based on NCBI build 37; RA: risk/non-risk alleles; RAF: risk allele's frequencies; EUR: European samples; CHN: Chinese samples; P: association P values in the meta, trans-ethnic meta analysis or the conditional study (alleles dosages in GWAS studies); OR: odds ratio; 95% CI: 95% confidence interval; p<sub>Q</sub>: heterogeneity P values.

There were two independent loci identified in our study (Caucasian): rs1990760, rs3747517. The two reported independent loci: rs17716942 and rs2111485, published by Lam et al (Nature Genetics, Nov 2012) are tagged by rs1990760.

**Supplementary Table 5b: Haplotypic association for markers in *IFIH1* locus with the risk of psoriasis**

| Haplotype | rs1990760 | rs3747517 | Combined European |           |                |          | Combined Chinese |           |                 |          | Combined All   |          |                |
|-----------|-----------|-----------|-------------------|-----------|----------------|----------|------------------|-----------|-----------------|----------|----------------|----------|----------------|
|           |           |           | Freq_contrl       | Freq_case | OR (95% CI)    | P        | Freq_contrl      | Freq_case | OR (95% CI)     | P        | OR (95% CI)    | P        | p <sub>Q</sub> |
| 1         | C         | T         | 27.69%            | 27.13%    | -              | -        | 68.22%           | 69.94%    | -               | -        | -              | -        | -              |
| 2         | C         | C         | 12.79%            | 9.27%     | 0.7(0.64-0.78) | 4.66E-12 | 13.05%           | 10.91%    | 0.81(0.75-0.87) | 2.85E-08 | 0.77(0.72-0.8) | 7.90E-18 | 3.26E-02       |
| 3         | T         | C         | 59.50%            | 63.58%    | 1.04(0.97-1.1) | 2.85E-01 | 18.73%           | 19.12%    | 0.98(0.92-1.04) | 4.76E-01 | 1.01(0.96-1.1) | 8.18E-01 | 2.06E-01       |
| 4         | T         | T         | 0.02%             | 0.01%     | 0.59(0.04-8)   | 6.92E-01 | 0.00%            | 0.03%     | NA              | 8.60E-01 | 0.59(0.04-8)   | 6.95E-01 | 8.53E-01       |

Haplotype 1 was set as reference. Freq\_contrl/Freq\_cases: the haplotype frequency in controls/cases; *P*: association *P* values for each haplotype in specified population; OR: odds ratio; 95% CI: 95% confidence interval; p<sub>Q</sub>: heterogeneity *P* values.



**Supplementary Table 5c: The pairwise linkage disequilibrium among the three SNPs in *IFIH1* locus**

| SNP       | rs2111485                 |                         | rs17716942              |                          | rs3747517            |                     |
|-----------|---------------------------|-------------------------|-------------------------|--------------------------|----------------------|---------------------|
|           | CEU                       | JPT+CHB                 | CEU                     | JPT+CHB                  | CEU                  | JPT+CHB             |
| rs1990760 | $r^2 = 0.826, D' = 0.925$ | $r^2 = 0.78, D' = 1.00$ | $r^2 = 0.20, D' = 0.85$ | $r^2 = 0.001, D' = 1.00$ | $r^2=0.409, D'=1.00$ | $r^2=0.453,D'=1.00$ |

\* The Linkage disequilibrium was calculated based on the samples from CEU population and JPT, CHB populations in HapMap.

**Supplementary Table 6: Conditional association results of *ERAPI/ERAP2* gene region**

| Analysis                | rsid      | Chr | BP.B37   | RA | RAF   |       | Combined European |                 | Combined Chinese |                 | Combined All |                 |                |
|-------------------------|-----------|-----|----------|----|-------|-------|-------------------|-----------------|------------------|-----------------|--------------|-----------------|----------------|
|                         |           |     |          |    | EUR   | CHN   | P                 | OR (95% CI)     | P                | OR (95% CI)     | P            | OR (95% CI)     | p <sub>Q</sub> |
| Unconditional           | rs30376   | 5   | 96120259 | C  | 0.286 | 0.503 | 5.31E-05          | 1.12(1.06-1.18) | 1.84E-09         | 1.16(1.11-1.22) | 7.23E-13     | 1.14(1.1-1.18)  | 3.21E-01       |
|                         | rs2910686 | 5   | 96252589 | C  | 0.424 | 0.398 | 7.24E-03          | 1.07(1.02-1.13) | 6.65E-05         | 0.9(0.86-0.95)  | 3.15E-01     | 0.98(0.95-1.02) | 2.57E-06       |
| Conditioning on rs30376 | rs2910686 | 5   | 96252589 | C  | 0.424 | 0.397 | 1.21E-06          | 1.15(1.09-1.22) | 6.74E-01         | 0.99(0.93-1.05) | 1.37E-03     | 1.07(1.03-1.12) | 3.43E-04       |

Chr: chromosome; BP.B37: position based on NCBI build 37; RA: risk/non-risk alleles; RAF: risk allele's frequencies; EUR: European samples; CHN: Chinese samples; *P*: association *P* values in the meta, trans ethnic meta analysis or the conditional study (alleles dosages in GWAS studies); OR: odds ratio; 95% CI: 95% confidence interval; p<sub>Q</sub>: heterogeneity *P* values.

There were two independent signal identified: rs30376 (*ERAPI*, tagged rs27432), rs2910686 (*ERAP2*, reported by Lam et al (Nature Genetics, Nov 2012)). The secondary locus is showing association evidence in Caucasian only.

**Supplementary Table 7: The association results of *HLA* region in Caucasian and Chinese samples**

| Condition on                                  | Variant    | Caucasians |                  |                           | Chinese  |                   |                           |
|-----------------------------------------------|------------|------------|------------------|---------------------------|----------|-------------------|---------------------------|
|                                               |            | MAF all    | OR (95% CI)      | P                         | MAF all  | OR (95% CI)       | P                         |
| None                                          | HLA-C*0602 | 14.80%     | 4.00 (3.62-4.41) | 3.05 x 10 <sup>-167</sup> | 13.80%   | 11.3(9.05-14.11)  | 2.09 x 10 <sup>-101</sup> |
| HLA-C*0602                                    | HLA-A*0207 | 0          | Absent           | Absent                    | 10.70%   | 2.99 (2.54-3.51)  | 5.30 x 10 <sup>-40</sup>  |
| HLA-C*0602 + HLA-A*0207                       | AA_B_67    | 8 to 42%   | omnibus          | 4.31 x 10 <sup>-25</sup>  | 8 to 54% | omnibus           | 8.96 x 10 <sup>-25</sup>  |
| HLA-C*0602 + HLA-A*0207 + AA_B_67             | HLA-A*0201 | 31.40%     | 1.26 (1.17-1.36) | 3.62 x 10 <sup>-10</sup>  | 13.10%   | 1.23 (1.03-1.49)  | 0.026                     |
| HLA-C*0602 + HLA-A*0207 + AA_B_67 + 1 variant | AA_A_114   | 2 to 43%   | omnibus          | 2.46 x 10 <sup>-5</sup>   | 8 to 54% | omnibus           | 6.04 x 10 <sup>-13</sup>  |
|                                               | rs9265656  | 14.30%     | 1.64 (1.39-1.93) | 5.27 x 10 <sup>-9</sup>   | -        | not imputed       | not imputed               |
|                                               | HLA-B*07   | 11.70%     | 0.60 (0.47-0.75) | 1.13 x 10 <sup>-5</sup>   | 1.20%    | 0.70 (0.40-1.21)  | 0.2                       |
|                                               | rs3131857  | 39.40%     | 1.02 (0.95-1.10) | 0.56                      | 22.60%   | 1.63 (1.36 -1.95) | 9.76 x 10 <sup>-8</sup>   |
|                                               | AA_A_144   | 20%        | 0.95 (0.86-1.04) | 0.23                      | 22.60%   | 0.65 (0.55-0.78)  | 1.55 x 10 <sup>-6</sup>   |

MAF: minor allele frequency; OR: odds ratio; 95% CI: 95% confidence interval. *P*: association *P* values in the meta, trans ethnic meta analysis or the conditional study.

**Supplementary Table 8: Haplotypic association for markers in *IL23R* locus with the risk of psoriasis**

| Haplotype | rs2295359 | rs12564022 | Combined European |           |                 |          | Combined Chinese |           |                 |          | Combined All    |          |                |
|-----------|-----------|------------|-------------------|-----------|-----------------|----------|------------------|-----------|-----------------|----------|-----------------|----------|----------------|
|           |           |            | Freq_contrl       | Freq_case | OR (95% CI)     | P        | Freq_contrl      | Freq_case | OR (95% CI)     | P        | OR (95% CI)     | P        | p <sub>Q</sub> |
| 1         | A         | C          | 33.06%            | 32.93%    | -               | -        | 31.75%           | 34.98%    | -               | -        | -               | -        | -              |
| 2         | A         | T          | 1.26%             | 2.16%     | 1.53(1.28-1.83) | 4.51E-06 | 2.58%            | 2.53%     | 0.87(0.74-1.01) | 7.27E-02 | 1.1(0.98-1.24)  | 1.03E-01 | 1.09E-08       |
| 3         | G         | C          | 38.88%            | 35.22%    | 0.88(0.84-0.93) | 6.31E-06 | 10.33%           | 8.78%     | 0.74(0.68-0.81) | 7.04E-11 | 0.84(0.81-0.88) | 4.70E-13 | 7.64E-03       |
| 4         | G         | T          | 26.80%            | 29.69%    | 1.06(1-1.13)    | 3.83E-02 | 55.33%           | 53.71%    | 0.88(0.84-0.93) | 5.86E-06 | 0.96(0.93-1)    | 5.44E-02 | 2.35E-05       |
| 4         | G         | T          | 26.80%            | 29.69%    | -               | -        | 55.33%           | 53.71%    | -               | -        | -               | -        | -              |
| 2         | A         | T          | 1.26%             | 2.16%     | 0.88(0.73-1.05) | 1.64E-01 | 2.58%            | 2.53%     | 0.97(0.83-1.14) | 7.35E-01 | 0.93(0.83-1.05) | 2.48E-01 | 2.29E-06       |
| 3         | G         | C          | 38.88%            | 35.22%    | 0.83(0.77-0.9)  | 1.94E-06 | 10.33%           | 8.78%     | 0.84(0.77-0.91) | 5.01E-05 | 0.83(0.79-0.88) | 4.11E-10 | 6.84E-05       |
| 1         | A         | C          | 33.06%            | 32.93%    | 0.91(0.84-0.99) | 2.46E-02 | 31.75%           | 34.98%    | 1.13(1.07-1.19) | 5.86E-06 | 1.06(1.01-1.11) | 1.24E-02 | 8.08E-08       |

Haplotype 1 was set as reference. Freq\_contrl/Freq\_cases : the haplotype frequency in controls/cases; *P*: association *P* values for each haplotype in the specified population ; OR: odds ratio; 95% CI: 95% confidence interval; p<sub>Q</sub>: heterogeneity *P* values.

**Supplementary Table 9: Results of gene function prediction analysis in 80000 gene expression profiles of identified genes**

| Gene  | Catalog | Term                                                     | P-value  | Annotated |
|-------|---------|----------------------------------------------------------|----------|-----------|
| TP63  | 1       | epidermis development                                    | 1.79E-31 | YES       |
| TP63  | 1       | skin development                                         | 5.63E-20 | YES       |
| RUNX1 | 1       | negative regulation of alpha-beta T cell differentiation | 2.35E-07 | NO        |
| RUNX1 | 1       | negative regulation of immune effector process           | 2.00E-06 | NO        |
| RUNX1 | 1       | regulation of epidermis development                      | 2.61E-06 | NO        |

Phenotypic annotations are obtained from the Mouse Genetics Initiative database ([www.informatics.jax.org](http://www.informatics.jax.org)). Table lists only genes and phenotypic annotations directly related to skin or epidermis development or immunological regulation. P-values refer to the correlation between the Gene principal component profile and the reconstituted phenotypic annotation principal component profile, uncorrected for multiple testing; all reported terms meet False Discovery Rate < 0.05. The Annotated column indicates if the gene has previously been linked to a specific mouse phenotype (Y) or not (N). Results are sorted alphabetically by gene name. The catalog means category of pathway. Pathway terms originate from 6 databases: 1. Gene Ontology Biological Processes; 2. Gene Ontology Cellular Component; 3. Gene Ontology Molecular Function; 4. KEGG; 5. BioCarta; and 6. Reactome.

**Supplementary Table 10: The correlation between *TP63* gene and tissue expression**

| <b>Tissue</b> | <b>No of samples</b> | <b>AUC</b> | <b>P-value</b>       |
|---------------|----------------------|------------|----------------------|
| Skin          | 545                  | 0.89       | $5 \times 10^{-216}$ |
| Keratinocytes | 48                   | 0.85       | $2 \times 10^{-17}$  |
| Epithelium    | 183                  | 0.78       | $9 \times 10^{-39}$  |

Results of the tissue, organ and tissue type specific expression analysis in 80,000 gene expression profiles. The expression profiles were annotation into tissues, organs, or cell types using the MeSH database (<http://www.nlm.nih.gov/mesh/>). Table lists only genes in which show high expression in skin or specific skin relevant cells. Sample count specifies the number of expression profiles annotated with given annotation. AUC (area under the curve) gives the estimate how much of the variation on given gene expression profile is explained by a given tissue, organ or tissue type. *P*-values refer to enriched expression for a given gene in specific tissue, organ or tissue type compared to all other annotation terms.

**Supplementary Table 11: The GO Enrichment Analysis of Implicated genes.**

| <b>Term</b>                                                          | <b>Genes</b>                                                                                                                                                      | <b>P</b> |
|----------------------------------------------------------------------|-------------------------------------------------------------------------------------------------------------------------------------------------------------------|----------|
| GO:0002682:regulation of immune system process                       | DDX58, ERAP1, IRF4,IL12B, IL13, IL28RA, NOS2,NFKBIA, <u><b>RUNX1</b></u> , ETS1                                                                                   | 4.14E-06 |
| GO:0050776:regulation of immune response                             | DDX58, ERAP1, IRF4, IL12B, IL13, IL28RA, NOS2, NFKBIA                                                                                                             | 8.96E-06 |
| GO:0048518:positive regulation of biological process                 | DDX58, KLF4, TRAF3IP2, CARD14, ERAP1,IRF4,IL12B,IL13, ILF3, NOS2, NFKBIA,PSMA6, <u><b>RUNX1</b></u> , RUNX3, STAT3, TNFRSF9, <u><b>TP63</b></u> , ETS1,REL, ZMIZ1 | 1.14E-05 |
| GO:0002376:immune system process                                     | DDX58, TRAF3IP2, ERAP1, ERAP2, IFIH1, IRF4,IL12B, IL13, IL23R, IL23A, NOS2, NFKBIA, <u><b>RUNX1</b></u> , ETS1                                                    | 1.49E-05 |
| GO:0010604:positive regulation of macromolecule metabolic process    | KLF4, CARD14,IRF4,IL12B, ILF3, NFKBIA, PSMA6, <u><b>RUNX1</b></u> , STAT3, <u><b>TP63</b></u> , ETS1, REL, ZMIZ1                                                  | 1.68E-05 |
| GO:0031325:positive regulation of cellular metabolic process         | KLF4, CARD14,IRF4,IL12B, ILF3, NFKBIA, PSMA6, <u><b>RUNX1</b></u> , STAT3, <u><b>TP63</b></u> , ETS1, REL, ZMIZ1                                                  | 2.19E-05 |
| GO:0045893:positive regulation of transcription, DNA-dependent       | KLF4, IRF4, ILF3, NFKBIA, <u><b>RUNX1</b></u> , STAT3, <u><b>TP63</b></u> , ETS1,REL, ZMIZ1                                                                       | 2.31E-05 |
| GO:0051254:positive regulation of RNA metabolic process              | KLF4, IRF4, ILF3, NFKBIA, <u><b>RUNX1</b></u> , STAT3, <u><b>TP63</b></u> , ETS1,REL, ZMIZ1                                                                       | 2.47E-05 |
| GO:0009893:positive regulation of metabolic process                  | KLF4, CARD14, IRF4, IL12B, ILF3, NFKBIA, PSMA6, <u><b>RUNX1</b></u> , STAT3, <u><b>TP63</b></u> ,ETS1, REL, ZMIZ1                                                 | 3.44E-05 |
| GO:0009607:response to biotic stimulus                               | DDX58, ERAP1, IFIH1, IL23A, NOS2, NFKBIA, STAT2, SOCS1, <u><b>TP63</b></u>                                                                                        | 3.46E-05 |
| GO:0051707:response to other organism                                | DDX58, ERAP1, IFIH1, IL23A, NOS2, NFKBIA, STAT2, SOCS1                                                                                                            | 4.47E-05 |
| GO:0010557:positive regulation of macromolecule biosynthetic process | KLF4, IRF4,IL12B, ILF3, NFKBIA, <u><b>RUNX1</b></u> , STAT3, <u><b>TP63</b></u> , ETS1, REL, ZMIZ1                                                                | 4.65E-05 |
| GO:0031328:positive regulation of cellular biosynthetic process      | KLF4, IRF4,IL12B, ILF3, NFKBIA, <u><b>RUNX1</b></u> , STAT3, <u><b>TP63</b></u> , ETS1, REL, ZMIZ1                                                                | 6.86E-05 |
| GO:0006955:immune response                                           | DDX58, TRAF3IP2, ERAP1, ERAP2, IFIH1, IL12B, IL13, IL23R, IL23A, NOS2, ETS1                                                                                       | 7.29E-05 |
| GO:0009891:positive regulation of biosynthetic process               | KLF4, IRF4, IL12B, ILF3, NFKBIA, <u><b>RUNX1</b></u> , STAT3, <u><b>TP63</b></u> ,ETS1, REL, ZMIZ1                                                                | 7.75E-05 |
| GO:0045941:positive regulation of transcription                      | KLF4, IRF4, ILF3, NFKBIA, RUNX1, STAT3, <u><b>TP63</b></u> ,ETS1,REL, ZMIZ1                                                                                       | 8.52E-05 |

The column of Genes lists the genes in each GO term from the input genes. The novel genes in our study were underlined and bonded. The *P* indicates the Fisher's exact test result.
